1

2 **Large, long range tensile forces drive convergence during *Xenopus* blastopore closure and**  
3 **body axis elongation.**

4

5 David R. Shook<sup>1</sup>, Eric M. Kasprovicz<sup>2</sup>, Lance A. Davidson<sup>3</sup>, and Ray Keller<sup>1</sup>

6

7

8 <sup>1</sup>Dept. of Biology, University of Virginia, Charlottesville, VA

9 <sup>2</sup>Dept. of Internal Medicine, Thomas Jefferson University Hospital, Philadelphia, PA

10 <sup>3</sup>Depts. of Bioengineering, Developmental Biology, and Computational and Systems Biology,  
11 University of Pittsburgh, Pittsburgh, PA

12

1 **ABSTRACT**

2 Indirect evidence suggests that blastopore closure during gastrulation of anamniotes, including  
3 amphibians such as *Xenopus laevis*, depends on circumblastoporal convergence forces generated  
4 by the marginal zone (MZ), but direct evidence is lacking. We show that explanted MZs generate  
5 tensile convergence forces up to 1.5  $\mu\text{N}$  during gastrulation and over 4  $\mu\text{N}$  thereafter. These  
6 forces are generated by convergent thickening (CT) until the midgastrula and increasingly by  
7 convergent extension (CE) thereafter. Explants from ventralized embryos, which lack tissues  
8 expressing CE but close their blastopores, produce up to 2  $\mu\text{N}$  of tensile force, showing that CT  
9 alone generates forces sufficient to close the blastopore. Uniaxial tensile stress relaxation assays  
10 show stiffening of mesodermal and ectodermal tissues around the onset of neurulation,  
11 potentially enhancing long-range transmission of convergence forces. These results illuminate  
12 the mechanobiology of early vertebrate morphogenic mechanisms, aid interpretation of  
13 phenotypes, and give insight into the evolution of blastopore closure mechanisms.

14

15

16 **Keywords:** biomechanics, mechanobiology, force, gastrulation, convergent thickening,  
17 convergent extension, blastopore closure, *Xenopus*

18



## 1 INTRODUCTION

2 Major morphogenic (shape-generating) movements in the development of multicellular  
3 organisms occur by integration of local, force-generating activities and force-transmitting  
4 properties of individual cells into “morphogenic machines” that act across the tissue-level length  
5 scale. Understanding the physical aspects of tissue movements is essential for understanding  
6 how cells and gene products function in morphogenesis (Keller et al. 2003; Keller et al. 2008),  
7 and thus biomechanical measurements, mathematical modeling, and rigorous engineering  
8 standards play increasing roles in experimental analyses (see Jacobson and Gordon 1976;  
9 Hardin and Cheng 1986; Priess and Hirsh 1986; Hardin 1988; Hardin and Keller 1988; Koehl  
10 1990; Hutson et al. 2003; Keller et al. 2008; Rodriguez-Diaz et al. 2008; Toyama et al. 2008;  
11 Layton et al. 2009; Varner et al. 2010). Semi-quantitative biomechanical properties of embryonic  
12 cells and tissues have been inferred from responses to micro-dissection (Beloussov 1990;  
13 Fernandez-Gonzalez et al. 2009; Ma et al. 2009; Solon et al. 2009; Martin et al. 2010; Fouchard et  
14 al. 2011), and in other cases, direct quantitative measurements have been made (Adams et al.  
15 1990; Moore 1994; Davidson 1995; Davidson et al. 1995; Moore et al. 1995b; Davidson et al.  
16 1999; Zhou et al. 2009; Zhou et al. 2010; Luu et al. 2011; David et al. 2014; Feroze et al. 2015).

17 A major component of gastrulation in amphibian embryos, such as those of *Xenopus laevis*, in  
18 many species of invertebrates and anamniotes, as well as in a few amniotes (see Stern 2004), is  
19 “blastopore closure”. In amphibians, blastopore closure occurs as the ring of presumptive  
20 mesoderm lying at the margin of the blastopore, called the “Involuting Marginal Zone” (IMZ),  
21 rolls, or “involutes”, over the blastoporal lip and simultaneously converges, or decreases in  
22 circumference, thereby “squeezing” the blastopore shut and internalizing the presumptive  
23 mesoderm in one motion (Figure 1, top panel; Movie 1, left embryo). Blastopore closure is a

1 systems-level process involving mechanical interplay of a number of regional morphogenic  
2 movements in amphibians (Schechtman 1942; Gerhart and Keller 1986; Keller and Shook 2004;  
3 Davidson 2008) and other species as well (Davidson et al. 1995).

4 The role of circumblastoporal tensile force in amphibian blastopore closure was inferred  
5 from the fact that breaking the continuity of the IMZ transverse to the axis of its convergence,  
6 and putative tensile force, results in catastrophic failure of normal involution and blastopore  
7 closure (Schechtman 1942; Keller 1981; Keller 1984; reviewed in Keller et al. 2003). The source  
8 of this tensile force was thought to be Convergent Extension (CE), an autonomous force-  
9 producing process of the IMZ in which its cells express a mediolaterally polarized cell motility, a  
10 resulting in the intercalation of cells along the mediolateral axis to produce a narrower, longer  
11 array, which generates a primary convergence force, and in turn, an extension force (Moore  
12 1994; Zhou et al. 2015). Disrupting this mediolaterally polarized cell motility (called  
13 “mediolateral intercalation behavior”, MIB) by perturbation of the planar cell polarity (PCP)  
14 pathway, blocks convergence in embryos and explants (Djiane et al. 2000; Tada and Smith 2000;  
15 Wallingford et al. 2000; Habas et al. 2001; Goto and Keller 2002; Habas et al. 2003; Ewald et al.  
16 2004). Finally, Feroze and others (2015) measured a convergence force of  $\sim 0.5 \mu\text{N}$  at the  
17 blastopore lip of *Xenopus* embryos, and Zhou and others (2015) measured the extension force  
18 after blastopore closure.

19 Although it was originally thought that CE was the sole source of convergence force in  
20 *Xenopus*, recent work (Shook et al. 2018) shows that a second convergence process, Convergent  
21 Thickening (CT), is also involved. CT was originally defined in explants of the ventral IMZ of  
22 *Xenopus* as an active, radial thickening, perpendicular to the embryonic surface or planar

1 dimension of the tissue, the IMZ in this case, that results in decreasing its planar dimension  
2 (convergence), and it was thought to occur only ventrally (Keller and Danilchik 1988). Recently,  
3 we found that CT occurs throughout the pre-involution IMZ, not just ventrally, and that the cells  
4 expressing CT undergo a transition to express CE at involution (Shook et al. 2018) (see Figure 1).  
5 CT is in many respects the opposite of what is known by convention as radial intercalation (RI),  
6 in which cells intercalate between one another perpendicular to the plane of the tissue, which  
7 results in the thinning (and spreading) of a tissue. The mechanism involves chemotactic  
8 polarization of movement (Szabo et al. 2016), integrin-fibronectin signaling (Marsden and  
9 DeSimone 2001), and boundary capture (Keller 1980; Szabo et al. 2016). During radial  
10 intercalation (often resulting in epiboly) cells enter the surface plane of the tissue, whereas CT is  
11 the reverse in that cells leave the surface of the tissue, minimizing tissue surface area, resulting  
12 in thickening and convergence of the tissue. Coupled with convergence by MIB, RI helps  
13 generate extension; in its absence, MIB could instead lead to thickening (see Keller et al. 2000).  
14 Another major difference between RI and CT is that, like MIB, RI depends on polarized cell  
15 behaviors (Ossipova et al. 2015), whereas our understanding of CT is that the underlying surface  
16 tension based mechanism does not require a polarized cell behavior, only motility to maximize  
17 high-affinity cell-cell contacts (Shook et al. 2018). In the geometric context of the IMZ, however,  
18 the collective result of the cell motility driving CT does result in a polarized, circumblastoporal  
19 tension.

20 Here we use various “giant explants” of normal embryos, including the entire IMZ, to  
21 measure the composite circumblastoporal convergence forces generated by CT and CE, and we  
22 use ventralized embryos lacking the dorsal tissues expressing CE to measure forces generated  
23 by CT alone. Therefore it is important to understand at the outset the different spatial and

1 temporal dynamics of CT and CE expression during early development. In our working model,  
2 CT (Figure 1A, white symbols) occurs throughout the IMZ as gastrulation begins and decreases  
3 the circumference of the IMZ symmetrically from all sides, which tends to push it toward and  
4 over the blastoporal lip, thereby contributing to its involution (Figure 1A, black arrows) and  
5 contributes to blastopore closure by advancing the blastoporal lips across the vegetal endoderm  
6 (Figure 1A, green arrows, VE; Movie 1, left embryo). The early involuting cells of the  
7 presumptive head, heart and lateroventral mesoderm (Figure 1A, B, orange), which expressed  
8 CT in the preinvolution IMZ, transition to migrating directionally across the blastocoel roof  
9 toward the animal pole after involution (Figure 1B, gray arrows, dorsal cutaway) (Winklbauer  
10 and Nagel 1991). In contrast, the following, later-involuting presumptive notochordal and  
11 somitic mesodermal cells (Figure 1A, B, magenta and red, respectively), which also expressed CT  
12 in the preinvolution IMZ, transition on involution to expressing MIB, and thus CE (Figure 1C,  
13 enlargement of 1B, MIB – aligned, black, fusiform cells; CE- green/blue arrows symbol).  
14 Expression of MIB is progressive, beginning anteriorly at the midgastrula (stage 10.5) with the  
15 formation of an arc of intercalating cells just inside the dorsal blastopore, called the “Vegetal  
16 Alignment Zone” (Figure 1C, VAZ). The VAZ spans the dorsal aspect of the blastopore and is  
17 anchored at both ends to the vegetal endoderm near the bottle cells (Figure 1C, asterisks  
18 indicating anchorage point, VE, BCs,). As preinvolution IMZ cells continue to express CT and aid  
19 in involution and blastopore closure throughout gastrulation (Figure 1D), MIB progresses  
20 posteriorly from its anterior origin in the VAZ. As preinvolution cells undergo involution, they  
21 cease expressing CT and begin expressing MIB as they round the blastoporal lip (Figure 1E),  
22 thereby adding to the posterior end of the postinvolution array of MIB expressing cells that span  
23 the roof of the gastrocoel (Figure 1E,F). The array of postinvolution, MIB expressing cells

1 increases in length and number of cells acting in parallel to drive CE (green-blue arrows symbol,  
2 Figure 1E). The cells that are progressively added at the posterior end of this array as the  
3 blastopore closes contribute to a constricting arc or hoop of tension just inside the blastoporal  
4 lip (Figure 1E), just as those that formed the VAZ did initially (Figure 1C). The posterior  
5 progressivity of expression of MIB/CE results in an increasingly anisotropic blastoporal closure  
6 from St. 10.5 (midgastrula) onward, with the dorsal/dorsolateral sides converging faster than  
7 the ventral/ventrolateral sides (green arrows, Figure 1D,E). These events are based on studies  
8 in embryos (Keller 1981; Keller 1984; Keller and Danilchik 1988; Keller et al. 1989; Lane and  
9 Keller 1997), correlation with live imaging of MIB in explants of the marginal zone (Wilson and  
10 Keller 1991; Keller and Winklbauer 1992; Shih and Keller 1992b; Shih and Keller 1992a;  
11 Domingo and Keller 1995), and characterization of CT (Shook et al. 2018).

12 To assay circumblastoporal tensile forces, we use “giant explants” consisting of the entire  
13 IMZ plus posterior ectodermal and neural tissues (Figure 1G), explants that reproduce the major  
14 the movements described above in embryos, excepting involution (Movie 4). CT occurs early  
15 and symmetrically across the entire mediolateral extent of the IMZ, beginning at the onset of  
16 gastrulation, and produces a progressive thickening and convergence of the IMZ (Figure 1G-H,  
17 white symbols; Movie 4) (Shook et al. 2018), a convergence that we believe acts as a preloading  
18 force that pushes the IMZ toward the blastoporal lip and tends to close the blastopore in  
19 embryos as described above. In explants, although IMZ cells do not involute, they nevertheless  
20 progressively stop expressing CT and express *postinvolution behaviors*, including MIB-driven cell  
21 intercalation (resulting in CE) initiated in the form of the VAZ (Figure 1I, black, fusiform shapes),  
22 beginning at the midgastrula stage. Here, in the explant, the ends of the VAZ are unanchored,  
23 ending within the vegetal edge of the explant (Figure 1I, asterisks) and when MIB-driven cell

1 intercalation shortens the arc, it acts with CT in the more posterior portions of the IMZ to  
2 converge the IMZ medially. As MIB progresses, the explant begins to undergo CE (Figure 1I,  
3 green/blue arrows). As MIB spreads posteriorly, it incorporates more of the cells in the IMZ in  
4 CE movements, progressively narrowing and elongating the axial and paraxial mesoderm from  
5 anterior to posterior (Figure 1J, green/blue arrows; Movie 4), as it would in the embryo (Figure  
6 1E). The posterior advance of MIB (Figure 1J, black fusiform shapes flanked by asterisks) marks  
7 the transition zone between the thick zone of continuing CT and the narrowing and extending  
8 zone of CE, and corresponds to the point at which cells would be involuting in an intact embryo.

9 The presumptive pattern of the future, post-involution expression of MIB (Figure 1 E,I,J) is  
10 mapped on to the IMZ of the giant explant at early and late stages (Figure 1K,L) and on the IMZ  
11 of the whole embryo (Figure 1M) to illustrate the A-P progression of MIB driven arc-shortening  
12 that drives CE. This pattern of MIB expression was determined from time-lapse imaging of the  
13 progress of MIB across open-faced explants (Shih and Keller 1992b; Domingo and Keller 1995;  
14 Keller et al. 2000). Congruent with the post-involution CE of the mesoderm, the overlying  
15 posterior neural tissue (spinal cord/hindbrain) also undergoes CE (Figure 1D, dark blue region),  
16 a CE that also occurs in explants (Figure 1D, J) (Elul et al. 1997; Davidson and Keller 1999; Elul  
17 and Keller 2000; Ezin et al. 2003; Ezin et al. 2006; Rolo et al. 2009; Ossipova et al. 2014). MIB  
18 occurs in various forms in ascidians (Munro and Odell 2002), nematodes (Williams-Masson et al.  
19 1998), flies (Irvine and Wieschaus 1994; Bertet et al. 2004), fish (Jessen et al. 2002; Glickman et  
20 al. 2003; Lin et al. 2005), and in the mesoderm (Yen et al. 2009) and neural tissue (Williams et al.  
21 2014) of the mouse.

1 In order to study and measure CT alone, we use giant explants of ventralized *Xenopus*  
2 embryos, which lack notochordal, somitic, and neural tissues and therefore do not express CE.  
3 Such embryos nevertheless involute their IMZ and close their blastopores (Scharf and Gerhart  
4 1980) (Movie 1, right embryo), suggesting that CT alone can close the blastopore (Figure  
5 1N,O)(see Keller and Shook 2004). IMZ explants from ventralized embryos show a rapid, near  
6 uniform CT throughout the IMZ (Figure 1P,Q, Movie 3) (Shook et al. 2018).

7 We assayed forces generated by explants including some or all of the IMZ, expressing CT and  
8 CE, together or alone, using a mechanical measuring device (the “tractor pull” apparatus; see  
9 Methods, Figure 2). We show that the IMZ can generate and maintain large, constant,  
10 convergence forces and transmit them over long distances for long periods. We also use a uni-  
11 axial tensile stress-relaxation test (Wiebe and Brodland 2005; Benko and Brodland 2007; Harris  
12 et al. 2012; Harris et al. 2013) to measure stiffness of embryonic tissues, which defines their  
13 deformation (or “strain”) in response to stress (force per unit area). We also demonstrate a  
14 previously unknown transition in which cells generate most or all of the force around the  
15 blastopore by CT until midgastrulation, when cells begin to progressively involute and generate  
16 force via the expression of MIB. These methods provide a quantitative approach for evaluating  
17 the cellular and molecular mechanisms of developing convergence (tissue shortening) forces  
18 and tensile stiffness. Quantification of tensile convergence force and tensile stiffness offers new  
19 insights into the causes of failure of blastopore closure, body axis extension, and neural tube  
20 closure. Failures of these processes produce common, often linked, but poorly understood  
21 phenotypes, which result from genetic and molecular lesions, notably of the PCP pathway  
22 (Ewald et al. 2004), and are of biomedical importance in neural tube defects.

1 **RESULTS:**

2 ***Giant Sandwich explants recapitulate most of the in vivo convergence movements of the IMZ***

3 Time-lapse movies show that the mesodermal (IMZ) and neural (NIMZ) tissues in  
4 unencumbered (un-restrained) giant sandwich explants (e.g. Movie 4) undergo convergence  
5 similar to that seen in embryos (e.g. Movie 1), except that the rate peaked earlier in explants  
6 (Figure 2-supplementary figure 1) and was only 57% of that in whole embryos during  
7 gastrulation (Table 1). Imaging explants as they were made revealed 600%/hr convergence in  
8 the first three minutes after cutting (Figure 2-supplementary figure 2), two orders of magnitude  
9 faster than that of post-construction explants or embryos (Table 1), suggesting that convergence  
10 against resisting tissues (e.g. the vegetal endoderm) resulted in stored elastic energy in the  
11 embryo, in line with prior findings (Beloussov et al. 1975; Beloussov 1990; Fung 1993).  
12 Therefore rapid, unmeasured convergence of the IMZ occurred when freed of this resistance at  
13 explantation. Unencumbered giants and intact embryos reached a minimal rate of convergence  
14 by 9 hours after the onset of gastrulation (G+9h) (Figure 2-supplementary figure 1), when  
15 involution is complete and convergence occurs only as CE of the involuted mesodermal tissues  
16 and overlying neural tissue. The dorsal tissues in giant sandwiches converged and extended well  
17 (Figure 2-supplementary figure 3), and tissue differentiation was as expected from previous  
18 work, as assayed by markers for notochord and somitic mesoderm (Figure 2-supplementary  
19 figure 4A-H) (see Keller and Danilchik 1988; Poznanski et al. 1997).

20 ***Giant sandwich explants generate a consistent pattern of force during blastopore closure***

21 The generation of force by IMZ tissues lying around the blastopore (circumblastoporally)  
22 was assayed by cutting these tissues from the embryo and making stable constructs (explants)



1 with plastic attachment strips. As this tissue converged mediolaterally, the tension generated  
2 was measured by observing the deflection of a probe pulled by a cleat on one of the attachment  
3 strips (Figure 2, Movie 2). Because we knew the spring constant (force per unit tip  
4 displacement) of the probe, we could calculate the amount of tension generated by the explant  
5 (Figure 3), tension that would be expressed circumblastoporally in the intact embryo.

6 Explants for Giant sandwiches were made by cutting the embryo ventrally and trimming off  
7 most of the vegetal endoderm and some of the animal cap region (Figure 2 A,B). Two  
8 Fibronectin coated plastic strips were then inserted between two such explants and the explants  
9 allowed to adhere to the strips and heal together within the test chamber (Figure 2H). One of  
10 the strips was adhered to the substrate (the “anchor”), while the other was free to move (the  
11 “sled”). The chamber was then positioned on a compound microscope, and an optical fiber  
12 probe was positioned adjacent to a “cleat” attached to the sled (Figure 2I). The explant was  
13 imaged from above at low magnification, while the probe position was imaged from below at  
14 high magnification (see Methods for further details).

15 Assays of standard giant sandwich explants (Figure 2B), beginning between control stages  
16 10.25(G+1hr) and 11.5(G+3.5h), showed a consistent pattern of circumblastoporal  
17 (mediolateral) tensile force increasing with time, in two major phases (Figure 3A, blue & green  
18 lines), using either a stiffer probe (#3, spring constant = 27  $\mu\text{N}/\mu\text{m}$ ) or a less stiff probe (#4,  
19 spring constant = 12  $\mu\text{N}/\mu\text{m}$ ). In the first phase, beginning when the explant pulled the cleat  
20 against the probe (Figure 2I), usually within the first 3 to 30 minutes of the assay, force  
21 increased steadily to over 1  $\mu\text{N}$  by the end of gastrulation in control embryos (stage 13, G+6h)  
22 and increased further by early neurulation (stage 14, G+7.5h) when it plateaued at about 2  $\mu\text{N}$

1 (Figure 3A, blue line). A second phase of force increase began 3 hours later (late neurula stage  
2 18, G+10.5h) with most samples exhibiting a second plateau at about 4 to 5  $\mu$ N by G+15 to 18  
3 (Figure 3A, blue line; Figure 3-supplementary figure 1A). Probe #3 measurements were similar  
4 to those with probe #4 (Figure 3, green line; Figure 3-supplementary figure 1B); they begin  
5 earlier only because explant construction was completed earlier. Animal cap sandwiches, which  
6 do not normally converge or extend, showed no convergence force (Figure 3A, brown line;  
7 Figure 3-supplementary figure 1C), thus ruling out healing and other artifacts. Probe drift and  
8 friction were accounted for (see Appendix 1; Figure 3-supplementary figures 2,3).

9 Immunohistochemical staining showed normal differentiation of somitic and notochordal  
10 tissues undergoing CE in mechanically loaded (encumbered) sandwiches (Appendix 2; Figure 2-  
11 supplementary figure 4A-H). As in unencumbered sandwiches, tissues in each half of the  
12 sandwich were fused with their counterpart in the other half (see Keller and Danilchik 1988;  
13 Poznanski et al. 1997). Notochords were sometimes split posteriorly (Figure 2-supplementary  
14 figure 4C, G), perhaps related to retarded convergence compared to that of unencumbered giants  
15 (Figures 2-supplementary figure 1B, 2-supplementary figure 3). Also the NIMZ, especially the  
16 non-neural portion, converged very little in the tractor pull, as compare to unencumbered giants  
17 (Figures 2-supplementary figures 1B, 2-supplementary figure 3; Movies 2, 4).

### 18 ***Contributions of the changing expression of CT and CE to convergence force.***

#### 19 *CT GENERATES CONVERGENCE FORCE EARLY AND THROUGHOUT GASTRULATION.*

20 Using standard giant explants, and dorsal, ventral, and ventralized explants allowed us to  
21 ferret out the relative contributions of CT and CE during the progressive transition from CT to  
22 CE. Giant explants express CT alone in early gastrula stages, followed by progressive transition

1 to expression of MIB/CE. The IMZ of unencumbered giant explants converges equally across its  
2 mediolateral extent, without anisotropic (dorsally-biased) extension through G+2h (stage 10.5)  
3 (Figure 1G,H; Movie 4, through about 13:34:57). Thus CT is expressed early, from the onset of  
4 gastrulation, and everywhere in the IMZ, rather than just ventrally and later, as previously  
5 thought (Keller and Danilchik 1988). To measure early forces, giant explants were made from  
6 late blastulae (the future dorsal side identified by “tipping and marking”; see Methods), mounted  
7 in the apparatus and measured before gastrulation began and prior to expression of MIB/CE.  
8 Tension appeared as early as stage 10 (Figure 3B, light blue line; Figure 3-supplementary figure  
9 1D) and rose to 0.3  $\mu\text{N}$  of force prior to the onset of MIB, which occurs at G+2h (Shih and Keller  
10 1992b; Lane and Keller 1997), demonstrating that CT alone generates this early force. Ventral  
11  $180^\circ$  sandwich explants (Figure 2D,E) and the entire marginal zone of UV ventralized embryos  
12 (Figure 2F,G), both of which largely lack dorsal, CE expressing tissues (see Appendix 2; Figure 2-  
13 supplementary figure 4M-P), converge equally across their mediolateral extent until reaching an  
14 equilibrium state of convergence and thickening (Movie 3). These ventral sandwich explants  
15 showed initial force increase similar to standard giant explants and plateaued at about 2  $\mu\text{N}$ ,  
16 similar to standard giant explants, but neither exhibited the second phase of force production  
17 (Figure 3D, yellow, orange lines; Figure 3-supplementary figure 1G,H). These results show that  
18 during gastrulation, forces equivalent to those generated by a combination of CE and CT in  
19 standard giants, are generated by CT alone in ventral/ventralized tissues and that CT continues  
20 to operate if not replaced by CE.

21 *EXPLANTS EXPRESSING CE OVER A LARGER PROPORTION OF THEIR MEDIOLATERAL ASPECT HAVE A REDUCED OR NO*  
22 *PLATEAU.*

1 Late giant explants, made as giant sandwich explants (Figure 2A,B) but at the midgastrula  
2 stage, and Dorsal 180 explants (Figure 2A,C), which develop largely dorsal tissues, show a more  
3 continuous increase of tensile force, with a moderate or no decline in the rate of force increase  
4 (Figure 3B and C, magenta and pink lines, respectively; Figure 3-supplementary figure 1 E,F)  
5 during the plateau of normal giants, and they show a final plateau of 3.5 to 4  $\mu\text{N}$  (G+14h; stage  
6 21-22), a little lower and earlier than normal giant explants. This more continuous rise in force  
7 is correlated with absent or reduced ventral/ventrolateral regions lying between dorsal MIB/CE  
8 expressing tissue and the attachment strips, which suggests that the presence of ventrolateral  
9 (presumptive posterior) tissues accounts for the plateau.

10 *THE PLATEAU IS LIKELY DUE TO STRAIN IN THE VENTROLATERAL TISSUES.*

11 Unencumbered giants converge (= negative strain) uniformly along their mediolateral axis  
12 (data not shown; see Movie 4) at 10%/hr (Table 1), whereas encumbered giants converge at  
13 70% of this rate in the dorsal sectors that are expressing CE, but no convergence in the more  
14 ventrolateral sectors not yet expressing CE during the first phase of force increase (Table 1;  
15 Movie 2). Comparison of the rate of shear of the explant with respect to the attachment strips  
16 (the rate of convergence of the edges of the widest part of the IMZ minus the convergence of the  
17 sled toward the anchor (Appendix 3)), showed that shear accounted for substantially more of  
18 explant convergence than did sled movement (Table 1). During the plateau, overall IMZ  
19 convergence dropped by 1.6%/hr for probe 3 while shear dropped by 1.2%/hr, such that it  
20 matched the remaining convergence of 2.5%/hr (Table 1; Appendix 3). By region, the overall  
21 decline in convergence was explained by a 0.6%/hr increase in strain in ventrolateral tissues  
22 and a 0.2%/hr decline in convergence in dorsal tissues. Thus, the plateau is due primarily to the  
23 increased strain of the ventrolateral tissues; this could be explained either by a decline in

1 stiffness, or by a decline or stall of force generation in this region. Also, the end of the plateau in  
2 giant explant assays is associated with significantly increased convergence of the ventrolateral  
3 regions by 2.2%/hr and significantly decreased convergence by 1.5%/hr in dorsal regions  
4 (Table 1), suggesting an increase in stiffness or force generation in these ventrolateral regions  
5 contributes to the end of the plateau.

6 ***Tension developed by explants represents a progressively increasing, instantaneous stall***  
7 ***force***

8 Forces generated by the cells within the tissue increase tension and drive convergence.  
9 Because the probe resists this convergence, tension across the explant increases over time.  
10 Tension increase is limited by the stall force of the motors involved (CT, CE) and by the yield  
11 strength of the tissues involved. We use “stall” here in the sense that cellular convergence can  
12 no longer proceed, e.g. because the tension across individual cells engaged in MIB is high enough  
13 that they can no longer pull themselves between each other; it is less clear what factor limits  
14 convergence by CT. Once the yield stress (force/area) for a tissue is reached, forces generated  
15 by CT and CE result in plastic deformation of that tissue, and convergence in one region is  
16 balanced by strain in another. Understanding the behavior of the explant requires an  
17 understanding of the biomechanically complex structure of the explant, and its dynamic changes  
18 over time. Also, it may be assumed that yield strength and stall force as they apply to the explant  
19 are not “all or nothing” effects; there are likely to be multiple structures with different rates of  
20 viscous flow leading to different rates of plastic deformation across a range of tensions. And  
21 because each cell is a motor, and is differently arranged within the tissue, they will reach their  
22 stall force at different over-all tensions across the explant.

1 We propose that initially (first 20-30 minutes) convergence proceeds rapidly until the stall  
2 force of the machine(s) is reached. At this point, force increase slows, advancing only as  
3 additional cells are recruited, either by the progression of MIB into more posterior tissues, or as  
4 shear allows convergence to proceed such that more MIB expressing cells are acting in parallel  
5 (see Figure 1I,J), increasing the “instantaneous” stall force for the current extent of  
6 morphogenesis. It less clear what effect convergence should be expected to have on an increase  
7 of the overall stall force of CT, but our results from ventralized explants (Figure 3D) suggest that  
8 they too increase stall force with convergence. This slower rate of force advance continues until  
9 the plateau, at which point the level of tension across the explant reaches the yield stress for the  
10 LV region, which results in its observed slight increase in strain rate, while CE continues to drive  
11 convergence in more dorsal tissues.

12 Our model above, that encumbered explants are increasing tensile force as they recruit more  
13 cells into MIB, predicts that applying additional exogenous tension to an explant should prevent  
14 further force generation by the explant until shear has allowed enough convergence such that  
15 the instantaneous stall force rises above the current level of tension. To test this, we applied  
16 additional tension to explants at various stages through the end of the plateau, by increasing the  
17 strain on them (Figure 3-supplementary figure 4A-E). Explants (n = 9) generally showed an  
18 immediate 0.5 to 0.6  $\mu\text{N}$  increase in tension, which decayed quickly over the next 15 to 30  
19 minutes, then remained static until the explant’s projected rise in force prior to being strained  
20 reached its new, current level of tension (e.g. Figure 3-supplementary figure 4 A,B). In no case  
21 did tensioned explants produce higher final amounts, or rates of increase, of force. These results  
22 demonstrate that increased tension stalls the force increase, as predicted, and that while the

1 explant can sustain greater tension, increased tension alone does not trigger increased force  
2 production.

3 If the force developed by the explant at a given time does represent an instantaneous stall  
4 force, we expect that decreasing tension by decreasing strain should allow more rapid  
5 convergence until the system maximum is reached again. Reducing strain by moving the anchor  
6 toward the probe (Figure 3-supplementary figure 4 F-I) enough to decrease tension on the  
7 explant by 1.2 to 1.4  $\mu\text{N}$  resulted in an immediate observed relaxation across the explant of from  
8 0.6 to 1.2  $\mu\text{N}$ , with the remainder corresponding to the rapid recoil of elastic strain during  
9 anchor movement ( $< 1$  second). After the initial, rapid elastic recoil, explants converged at a rate  
10 similar to unencumbered explants (about 10%/hr, see Table 1), until recovering their prior  
11 tension levels (e.g. Figure 3-supplementary figure 4 F,G). Recovery was consistently ( $n = 6$ )  
12 rapid ( $< 15$  minutes) during the first phase of force increase, whereas it was consistently ( $n = 4$ )  
13 slower (30 minutes or more) during the major plateau or during dorsal bottle cell re-expansion.  
14 After recovery during the first phase of force increase, explants converged at rates more typical  
15 of encumbered explants (about 4%/hr, Table 1). This rapid recovery supports our model that  
16 explants generate tension until reaching an instantaneous stall force, with consequently  
17 retarded convergence during all but their initial period of force increase. The slower recovery of  
18 the explants to normal levels of tension during the plateau is consistent with lower levels of  
19 stored elastic energy, across the explant as a whole at this time (Discussion).

20 We tested the idea that less force was being generated during the plateau phase, based on the  
21 premise that reduced force generation results in lower stored elastic energy, which is  
22 presumably continuously dissipated by long term viscous tissue flow, loss to heat, etc. While not

1 quantitative, the immediate, rapid elastic recoil (tension released by anchor movement –  
2 observed tension drop; see Figure 3-supplementary figure 4 F-I), which occurs at a rate much  
3 higher than observed for normal explant convergence, suggesting it is not dependent on  
4 metabolic energy expenditure (Chen 1981), should provide a qualitative assessment of the  
5 relative amount of elastic energy stored. Both the fraction of tension released by anchor  
6 movement that was recovered during rapid recoil and the rate of that recoil were greater during  
7 the first phase of force increase compared to the plateau phase. We compared the fraction of  
8 tension relaxation that was recovered within the first 5 seconds (fractional recoil = immediate  
9 elastic recoil/tension released by anchor movement; see Figure 3-supplementary figure 4 F-I),  
10 and the rate of recoil in the first 5 seconds (recoil rate = immediate recoil distance (as a percent  
11 of total mediolateral explant width)/time). We found that the fractional recoil was 41% (S.E. =  
12 +/- 5%, n = 6) during the first phase of force production, compared to 28% (S.E. = +/- 5%, n = 3)  
13 during the plateau. The recoil rate was 670%/hr (S.E. = +/- 90%/hr; n = 7) during the first phase  
14 of force increase (similar to the recoil rate of 600%/hr seen in explants freshly cut from intact  
15 early gastrulae), compared to 390%/hr (S.E. = +/- 32 %/hr; n = 3) during the plateau. These  
16 results show that during a tractor pull, explants, like the intact embryo, store considerable  
17 elastic strain-energy, more of which is recoverable during the first phase of force increase than  
18 during the subsequent plateau. This is consistent with the idea that ventrolateral tissues have  
19 reduced force accumulation during the plateau (Discussion). Alternatively, the rate of  
20 dissipation may increase during the plateau, e.g. because the tissue has reached its yield stress  
21 and is deforming plastically.



1 ***Structural stiffness increases in all tissues around the end of gastrulation.***

2 In order to develop better models for how embryonic tissues deform in response to the  
3 forces they generate, it is useful to measure embryonic tissue stiffness. As a general concept,  
4 stiffness is measured by asking how much a material stretches along the axis of tension (strains)  
5 when a known amount of tensile stress (force per unit area) is applied to it. Structural stiffness  
6 and the elastic modulus are different specific mechanical properties that describe a material's  
7 stiffness and that can be measured experimentally with similar methods. The **elastic modulus**  
8 is a fundamental property of a particular type material, for example steel, independent of its  
9 specific geometry, and is measured by asking how much a uniform material of known cross-  
10 sectional area (orthogonal to the axis of tension) strains when a known amount of tensile stress  
11 is applied to it. By contrast, **structural stiffness** of a composite structure depends on the  
12 mechanical properties and arrangement of the individual elements that make up the structure,  
13 such as a bridge made of steel beams, or in our case, of the individual tissues and cell types and  
14 ECM that make up the explant. Elastic modulus of the individual elements may be inferred from  
15 a measurement of structural stiffness if the elements and architecture of the structure can be  
16 accurately modeled and the strains in each element measured, an approach that has been  
17 applied to embryonic tissues (e.g. Zhou et al. 2009), but is beyond the scope of the current work.

18 We could not measure a true elastic modulus of embryonic tissues because the tests are not  
19 isometric nor are the explants uniform or homogenous (see Appendix 5). Instead we estimated  
20 structural stiffness along the mediolateral axis of the explants with a uniaxial, tensile stress  
21 relaxation test (Figure 4), and estimated sagittal sectional areas from fixed samples (Figure 5A;  
22 see Appendix 3). In our case, structural stiffness reflects the mechanical properties and

1 organization of the individual tissues and cell types that make up the explant, as well as its  
2 overall geometry. Fixed samples of standard Giant and Dorsal 180° explants show similar  
3 increases in sagittal area (Figure 5A) due to progressive MIB-mediated intercalation (Figures  
4 11,I). Ventral 180° explants increase in sagittal area until about the time of the plateau, then  
5 remain stable, suggesting either that thickening has reached an equilibrium, or is  
6 developmentally programmed to stop.

7 From the time-dependent stress decay (Figure 4C, F), parameters for a network model of  
8 stress relaxation were estimated (Figure 4E; see Appendix 4), including the residual structural  
9 stiffness and constant of spring stiffness for the explant at 180 seconds after strain application  
10 (Figure 5), as well as instantaneous structural stiffness and viscosity (Figure 5-supplementary  
11 figure 1; Appendix 4). A standard 300  $\mu\text{m}$  displacement from the probe produced an average  
12 12% (range = 8 to 14%) strain of the mesodermal region between the sleds by 180 seconds, in  
13 giant explants initially at rest. The modulus estimated from structural stiffness's along the  
14 mediolateral axis of giant explants rose significantly from 14 Pa (Pascals) at late gastrulation  
15 (G+4.8h) to 21 Pa by mid neurulation (G+8.7h) ( $p < 0.01$ , paired t-test,  $n = 6$  vs. 6) (Figure 5B).  
16 After release from tension, explants recoil rapidly and typically returned to near their initial  
17 width within three minutes, with about 25% of the initially applied strain lost to permanent, or  
18 plastic, deformation, leaving them about 3% longer, indicating that while they can store elastic  
19 strain energy, some dissipation occurs, for example by the rearrangement of cells or structural  
20 elements within them.

21 D180° and V180° sandwich explants also showed a trend of increasing stiffness from  
22 gastrula to neurula stages (Figure 5B) with both showing an increase between stages 12 and 14

1 (G+4.3 and 7.6h) but showed no significant differences from each other at any stage.  
2 Presumptive ectodermal (AC) sandwiches strained an average of 24% over 180 seconds showed  
3 increased structural stiffness ( $p < 0.01$ ,  $n = 5$  vs. 3) from gastrula to neurula stages (Figure 5B),  
4 but their stiffness is not significantly different from that of standard giants at either stage. By  
5 late neurulation AC explants also showed plastic deformations of 25% of total strain. AC explants  
6 were substantially more plastic during gastrulation however, with about 65% of the total strain  
7 remaining as plastic deformation, suggesting a lesser ability to store elastic strain energy than  
8 during neurulation.

9 Although a bulk measure for the explant as a whole, our measures of structural stiffness  
10 provide baseline estimates for mechanical behaviors of embryonic tissues. Somewhat  
11 surprisingly, all explants types measured, although comprised of different sets of tissues, exhibit  
12 similar structural stiffness, and their stiffness increases by about the same amount from  
13 gastrulation to neurulation.

14 To understand how differential strain of tissues, as found above in our investigation of the  
15 plateau, relates to blastopore closure, we measured spring stiffness for each explant type over  
16 time. Tissue spring stiffness (force/strain) reflects the deformation or strain that a tissue of a  
17 specific cross sectional area will undergo in response to a force, and so can be used to predict the  
18 strain in different tissues across the explant when subjected to the same tension. Standard  
19 giants, D180°, V180° and AC explants all showed a trend of increasing spring stiffness between  
20 gastrula and neurula stages (Figure 5C). Standard giants did not differ significantly between  
21 gastrula stages but increased significantly from stage to stage thereafter ( $P < 0.01$ ,  $n$ 's = 6 vs. 6;  
22 vs. 3), doubling between G+4.8 and G+8.7. AC sandwich explants also increased significantly ( $P$

1 < 0.05, n = 3 vs. 3) between gastrula and neurula stages. Standard giants had significantly higher  
2 spring stiffness than AC sandwich explants by 5 to 6 fold at all stages ( $p < 0.05$  during  
3 gastrulation,  $p < 0.01$  during neurulation; n's = 3 vs. 3 to 6), indicating that ectodermal tissues  
4 contribute little to the ability of the IMZ to resist tension along the mediolateral axis during  
5 tractor pulls. D180° explants showed greater increases compared to V180° explants and  
6 standard giants, but were not significantly different at any stage. V180° explants were similar to  
7 standard giants until after mid-neurulation when their spring stiffness was moderately (37%)  
8 but significantly lower ( $p < 0.01$ , n = 2 vs. 3). The greater spring stiffness of giants vs. ventral  
9 180° explants by the end of neurulation is consistent with increased overall spring stiffness of  
10 giants as dorsal tissue differentiation progresses laterally. In the context of our sandwich  
11 explants by the time of the plateau, ventrolateral tissues undergo more strain than dorsal  
12 tissues, because dorsal tissues have a larger and increasing sectional area.

13

14

## 1 **DISCUSSION**

### 2 ***The circumblastoporal tissues (IMZ & NIMZ) produce and maintain long-term, long range,*** 3 ***consistent patterns of convergence force throughout early development.***

4 Giant sandwich explants (IMZ & NIMZ) generate and maintain a consistent pattern of  
5 convergence force throughout gastrulation, neurulation, and into the tailbud stage. Correction  
6 for drift of the two probes of different stiffness's yielded similar force profiles, suggesting that  
7 our results are robust to different sources of error. Wound healing at the edges of the explants  
8 (Davidson et al. 2002) or a response to cell lysate from surgery (Joshi et al. 2010; Kim et al.  
9 2014) could generate force, but AC explants, which are also cut and heal, do not generate  
10 significant tensile force, making this unlikely.

### 11 ***CT generates preinvolution, circumblastoporal tension throughout gastrulation.***

12 Previously, post-involution CE was thought to generate the convergence force driving  
13 blastopore closure, as well as the post-involution anterior-posterior extension that elongates the  
14 body axis (Keller and Danilchik 1988; Moore et al. 1995b; Keller et al. 2000). CT was described  
15 in the ventral sector of the *Xenopus* gastrula (Keller and Danilchik 1988) but its force  
16 contribution to gastrulation and the fact that it occurred everywhere in the IMZ was unknown.  
17 Here, several results show that CT generates circumblastoporal tension early and throughout  
18 the IMZ. First, standard giant explants produce force early (Figure 3B), before MIB and CE have  
19 begun (G+2h, stage10.5) (Shih and Keller 1992b; Lane and Keller 1997). Second, ventral 180°  
20 and ventralized giant explants that do not express CE also generate circumblastoporal force  
21 (Figure 3D), which is likely due to their expression of CT. Third, unencumbered ventralized  
22 giants show uniform CT throughout the MZ (Movie 3). Thus CT generates all the IMZ

1 convergence prior to the onset of CE at the early midgastrula stage (stage 10.5, G+2h). Although  
2 force from ventral and ventralized explants levels off during the plateau period of standard  
3 giants, it persists and contributes to blastopore closure throughout gastrulation by decreasing  
4 the circumference of the IMZ and directing it to the point of involution. CT may continue into  
5 neurulation and function in the late involution of the ventrally located, posterior paraxial  
6 mesoderm (Keller and Tibbetts 1989; Wilson et al. 1989). These findings explain how  
7 ventralized *Xenopus* embryos (Scharf and Gerhart 1980) and normal embryos of some  
8 amphibians such as *Gastrotheca riobambae* (del Pino 1996) close their blastopores in the  
9 absence of CE (Keller and Shook 2004; del Pino et al. 2007) and symmetrically, as are CT  
10 movements in normal *Xenopus* embryos. These results establish CT as a morphogenic machine  
11 independent of CE, and raise the question of how widely it occurs and how it is integrated with  
12 other movements, in amphibians as well as other species, (see below).

13 ***The force profile reflects the transition from CT to CE and illuminates the mechanics of***  
14 ***gastrulation.***

15 Analysis of the force profiles of the various explants, in the context of the degree to which they  
16 express CT and CE, illuminates much about the mechanics of gastrulation and blastopore closure.  
17 We represent the capacity of CT and CE to generate and transmit tensile force in the explants at  
18 different stages of expression of CT and CE (A-D) as a linear array of motors and springs (light  
19 ones representing CT, darker ones CE/MIB, Figure 6B'-D')). First, the fact that these tissues can  
20 generate, transmit, and maintain tensile force across the millimeters of tissue (Figure 6E)  
21 indicates that there is a global, large-scale mechanical integration of forces, meaning that  
22 morphogenic movements anywhere throughout the 1.2 mm diameter embryo could affect one

1 another mechanically. The tension generated by the motor and the stiffness of the spring  
2 determines the convergence or strain experienced by each element of the array as well as  
3 neighboring elements and, integrated across the explant, of the explant as a whole. Second, based  
4 on the mediolaterally uniform convergence during CT, prior to the onset of CE (Shook et al. 2018),  
5 we assume that mechanical properties and behavior within the IMZ are uniform before CE begins,  
6 and the evidence shows that CT is expressed uniformly across the mediolateral extent of the  
7 explant, prior to the onset of CE and thus accounts for all the measured force up to G+2h (Figure  
8 6B', gray arrow to E, blue force trace of early giants). The same is true of ventralized embryos,  
9 expressing CT throughout the IMZ (Figure 6B', gray arrow to E, black force trace of ventralized  
10 embryos). The timing of CT in explants argues that this force occurs in the pre-involution IMZ of  
11 the embryo (Figure 6B, gray arrow to 6F, embryonic preinvolution IMZ), and its uniform  
12 dorsoventral expression accounts for the relatively uniform convergence of the blastopore during  
13 early gastrulation of normal embryos and throughout gastrulation in ventralized embryos (Figure  
14 1A,N, green arrows).

15 At stage 10.5, cells begin to undergo a progressive, patterned transition from CT to MIB (CE) as  
16 they involute, beginning in the presumptive anterior somitic mesoderm with formation of the  
17 Vegetal Alignment Zone (VAZ), and progressing medially and posteriorly (Shih and Keller 1992b)  
18 (Figure 6C). At this point the explant becomes morphogenically heterogeneous, with a  
19 presumptive anterior region of MIB driving CE located centrally (Figure 6C, black fusiform cells,  
20 green, blue arrows), and a presumptive posterior region of CT uniformly expressed across the  
21 remaining posterior of the IMZ (Figure 6C, white symbols). In this phase, the central CE/MIB  
22 region is initially linked to the sled and anchor strips only via the lateral, CT expressing regions of  
23 the explant (Figure 6C, C'), and force generation by the central region of MIB results in the

1 observed, continued convergence of this region while the lateral region expressing CT, with its  
2 lower spring stiffness, undergoes strain. The weaker spring-motor combination of the CT  
3 expressing regions thus limits the transmission of force to the measuring apparatus (Figure 6 C',  
4 gray+black arrow to E, plateau in green force trace), eventually leading to the observed plateau  
5 (Figure 3), when the lower yield strength of the CT region (as reflected in its lower spring  
6 stiffness) is reached. As the transition of MIB/CE spreads further posteriorly, it reaches the sled  
7 and anchor strips at the end of the plateau (G+10.5h), the weaker CT regions are replaced by  
8 stronger MIB/CE regions (as reflected by their higher spring stiffness), the weaker link is  
9 removed, and the force rises again (Figure 6C-D, C'-D', black arrow to E, green line in E). This  
10 interpretation is supported by our observations that ventral giant explants, which only express  
11 CT, reach but never advance beyond the same plateau level of force as standard giant explants  
12 containing the lateral regions (Figure 6E, black and green force traces, respectively), that dorsal  
13 explants, which have MIB directly connected to the sleds, show no plateau and that late giants,  
14 which already express MIB across a greater mediolateral span of the marginal zone when initially  
15 placed under tension, show only moderately decreased force increase during the plateau period of  
16 standard explants (Figure 6E, pink and purple force traces, respectively).

17 In the embryo, however, the stronger MIB/CE region never acts in direct series with an  
18 intervening, weaker CT region; instead MIB originates at the lateral boundary of the somitic  
19 mesoderm at its junction with the vegetal endoderm, and is anchored there (Figure 6G,H,  
20 asterisks), thereby forming a continuous, uniform convergence mechanism based on CE (D'),  
21 which acts as a coherent system in the embryo (Figure 6D', black arrow to G, H), a situation  
22 achieved in the post-plateau explant (Figure 6D, black line to 6E, post-plateau standard giant,  
23 green, dorsal 180 explants (pink), and late explants (magenta) force traces).



1 The influence of the post-involution expansion of MIB expression posteriorly from its onset in  
2 the VAZ is reflected in the progressively more anisotropic blastopore closure from stage 10.5  
3 onward, and in the dorsal region of the IMZ dominating closure, something that cannot be  
4 accounted for by the isotropic convergence of pre-involution CT (Figure 1A,D, green arrows).

5 Unlike CT, the total force generated by CE (MIB) is under-estimated by our measurements,  
6 because CE results in extension of many of the cells expressing MIB away from the zone directly  
7 between the sleds, and these cells therefore pull on the sled/anchor system at an increasing angle  
8 (Figure 6D). However, the same is true in the embryo, as progressively more of the population of  
9 MIB expressing cells lie far anterior of the posterior progress zone of MIB at blastoporal lip (Keller  
10 1984; Keller et al. 1989; Keller and Tibbetts 1989; Wilson and Keller 1991)(Figure 6G, H), and  
11 thus the force measured with the giant explant may reasonably approximate that generated at the  
12 blastoporal lip through the end of gastrulation.

13 The convergence of the somitic mesoderm during late neurulation involves MIB but also  
14 columnarization (thickening) (see Keller et al. 1989; Wilson et al. 1989), which forms converging  
15 “somitic buttresses” that may contribute to folding neural plate (Schroeder 1971; Keller 1976).  
16 Our force measurements of convergence forces exerted by the intact embryo during this time are  
17 unquestionably a substantial underestimate (see also Estimates of Force/cell, below), both for the  
18 reasons listed above, and because embryos have assembled their mesoderm and neural tissues  
19 into laminar aligned structures that have undergone the full extent of normal convergence  
20 movements, in contrast to the retarded convergence of our explants.

21 Finally, when we explant tissue it expends its stored elastic energy as it converges rapidly,  
22 and consequently its subsequent convergence is slower than intact embryos and the additional

1 force is measured. Observed force is further reduced by friction, perhaps by 0.2  $\mu\text{N}$ , despite the  
2 slick agarose pad beneath the explant and by the glass beads beneath the sled. Therefore force  
3 measured here should moderately underestimate that generated at the instantaneous stall force  
4 or yield strength of the embryo, for a given extent of morphogenic progress.

## 5 ***Explant stiffness***

6 *Xenopus* embryonic tissues stiffen about 2 fold along their mediolateral axis around the  
7 end of gastrulation, regardless of the tissue type, suggesting a systemic mechanism. Such  
8 increases may have many causes, such as increased ECM deposition (Davidson et al. 2004;  
9 Skoglund et al. 2006), increased cell-cell adhesion, or stiffness of cytoskeletal architecture  
10 (Zhou et al. 2009). The high plasticity after strain of the ectodermal tissue during gastrulation  
11 is consistent with its response to strain during epiboly, when its area is increased by about 2  
12 fold (Keller 1975; Chien et al. 2015). Whatever the causes, the increase in the stiffness of all  
13 the tissues at the end of gastrulation may cause decreased plasticity, as well as the resetting  
14 of pseudo-elasticity to a thinner epithelial set point (Luu et al. 2011). Previous estimates of  
15 AP compressive stiffness of dorsal isolates at stage 11.5 (about 14 Pascals, Moore et al. 1995a;  
16 Zhou et al. 2009), are very similar to ML tensile structural stiffness at stage 11.5 (G+3.5h)  
17 measured here (Figure 5B), suggesting that the same mechanical elements may be resisting  
18 ML widening in both cases. In explants, the constant of spring stiffness for dorsal tissue  
19 continues to rise after early neurulation while that for ventral tissue does not (Figure 5C), in  
20 part because the transverse sectional area of tissue between the attachment strips increases in  
21 the former but not in the later (Figure 5A). More reliable measurements will be required to  
22 properly resolve the relative stiffness of ventrolateral or posterior tissues expressing CT  
23 compared to dorsal tissues expressing CE. In any case, the observed transmission of forces

1 across the full length of the IMZ makes it clear that tissue stiffness links the entire embryo  
2 into a mechanical “mechanome” (Kamm 2006; Lang 2007) in which major regional  
3 morphogenic movements can affect one another. This accounts for the fact that molecular  
4 interdictions of epiboly of the animal cap can affect blastopore closure on the other pole of  
5 the embryo, although no molecular perturbation was made there, and that the blastopore  
6 closure defect can be rescued by cutting off the animal cap, thus breaking the mechanical link  
7 (e.g. Eagleson et al. 2015). Lastly, the tissue connectivity of force-producing regional  
8 morphogenic movements is an important parameter for successful embryonic  
9 morphogenesis. For example, direct linkage of MIB/CE to the sleds, rather than linkage  
10 through CT regions, eliminates the plateau in measured force increase, suggesting that the  
11 direct anchor-points of MIB in the vegetal endoderm in the embryo are an important aspect  
12 of its architecture.

### 13 ***Accommodation to load and stall force***

14 Some evidence suggests that tissues modulate their force production in response to changes  
15 in load. The mechanical properties of embryonic tissues from different clutches vary (von  
16 Dassow and Davidson 2009), yet gastrulation proceeds at roughly the same rate, suggesting that  
17 force production accommodates to the tissue properties encountered. Explants of dorsal tissues  
18 embedded in gels of increasing stiffness respond by producing more force (Zhou et al. 2015).  
19 Time-lapse recordings of blastopore closure show occasional decreases in rate, including  
20 temporarily stalling out and then recovering rapidly, as if transient overloads of resistance were  
21 being overcome by increased force production (personal observation). However, in our  
22 experiments increasing tension did not result in greater convergence force, and instead,  
23 temporarily stalled force increase until further morphogenesis had occurred. We suggest that

1 this is because our explants are already at their instantaneous stall force (see below and  
2 Appendix 6).

3 Our results suggest that explanted tissue builds tension relatively rapidly when initially  
4 encumbered, until it reaches its stall force. Further force increase is then limited by the rate at  
5 which the number of cells expressing MIB increases and by their rate of intercalation, such that  
6 more pull in parallel, rather than in series. Intercalation is in turn limited by the roughly 4%/hr  
7 rate of convergence allowed by explant shear off the attachment strips, lateral strain, and, to a  
8 much smaller extent, probe movement. We predict that allowing more rapid convergence should  
9 allow force to rise more rapidly. It is not clear how force generation by CT would be expected to  
10 change as tissue thickens, but the ventral/ventralized tractor pulls show that force increase  
11 correlates with thickening, until both cease once reaching the plateau.

12 Mesodermal tissues in normal embryos are probably rarely at their stall force, since  
13 convergence occurs more rapidly. When convergence is impeded, tension comparable to that  
14 generated in tractor pulls accumulates around the blastopore during gastrulation (Feroze et al.  
15 2015), suggesting these are also measures of force at their instantaneous stall force. A more  
16 accurate reflection of forces in the embryo might be obtained by looking at points along the  
17 force-velocity curve more closely resembling the situation in the embryo, e.g. by starting with  
18 about 0.2  $\mu\text{N}$  of tension and moving the anchor strip toward the probe at 1 or 2%/hr.

### 19 ***Estimation of forces generated per cell and tensional stress of convergence***

20 To estimate the force generated per engaged cell, we determined the average effective  
21 sagittal-sectional area (SSA) of the deep mesoderm, the cell population we expect is effective  
22 in bulk force production during the tractor pull (Table 2). We estimate that the mean

1 mediolateral tensile force per cell rises during the first half of gastrulation and stabilizes by  
2 mid gastrulation at around 2.3 nN/cell, where it remains (Table 2). These values assume  
3 negligible contribution from neural tissues and give equal weight to each cell within the  
4 effective SSA, although different proportions of cells may express CT, CE or no force  
5 generating behavior and may direct force mediolaterally more or less efficiently. We assume  
6 a constant cell size, although some cell division occurs in the somitic mesoderm during  
7 gastrulation and neurulation. The constant force per cell is consistent with the idea that  
8 increasing stage-specific maximal force generation is limited primarily by morphogenesis, as  
9 it increases the SSA. We also calculated tensional stress within the effective SSA (Table 2),  
10 which was roughly 4-fold lower than the mediolateral tensile stress estimated from extension  
11 forces exerted by dorsal tissues in a gel (Zhou et al. 2015), which is not surprising given that  
12 their measurements capture all of the force generated during late neurula stages in tissue that  
13 has undergone normal morphogenesis, compared to our which primarily capture forces  
14 generated around the blastopore, as described above.

### 15 ***CT to CE, a major morphogenic, regulatory, and evolutionary transition in the Amphibia***

16 The temporal, spatial parameters of the CT to CE transition, and its biomechanical  
17 implications, represent a major morphogenic and regulatory transition. The force traces show  
18 that CT-generated forces occur early and throughout the IMZ prior to its involution, whereas CE,  
19 and its underlying cell behavior, MIB, are expressed after involution and progressively, with  
20 increasing numbers of cells acting in parallel with time (Shih and Keller 1992b). This  
21 progressive CT to CE transition at involution in *Xenopus* (Figure 1, 6) explains the dominance of  
22 the symmetric circumblastoporal forces of CT in the pre-involution region of the early gastrula,  
23 and the dominance of the asymmetric, CE forces in the post-involution region of *Xenopus*

1 embryos beginning from the midgastrula stage (Keller and Danilchik 1988). At the other end of  
2 the spectrum of CT-CE transition, *Gastrotheca riobambae* delays all CE until neurulation and has  
3 a completely symmetrical blastopore closure, both externally and internally (del Pino 1996).  
4 Others, such as the direct developing *Eleutherodactylus coqui* and *Epipedobates tricolor*, show  
5 intermediate CT-CE transitions (D. Shook, personal observations). In ongoing work, we are  
6 testing the idea that the deployment of CT and CE varies with the egg size and the amount and  
7 distribution of yolk and the mechanical challenges changes in these parameters present to the  
8 morphogenic machines of gastrulation.

## 9 **Conclusions**

10 Our findings illustrate that CT is one of the morphogenic machines that contribute to  
11 blastopore closure, along with CE and Vegetal Rotation (Winklbauer and Schuerfeld 1999) and  
12 that CT is capable of closing the blastopore on its own in the absence of CE patterning, as in  
13 ventralized embryos. If we assume that the cell motility driving CT is not dependent on the PCP  
14 pathway, since it does not depend on polarized motility, it appears that CT clearly can not  
15 reliably close the blastopore in the presence of patterned but non-functional CE (Djiane et al.  
16 2000; Tada and Smith 2000; Wallingford et al. 2000; Habas et al. 2001; Goto and Keller 2002;  
17 Habas et al. 2003; Ewald et al. 2004), a hypothesis we test elsewhere (Shook et al. 2018).  
18 Presumably, blocking CT while allowing CE to occur in an inappropriate context would also  
19 block blastopore closure. Normal blastopore closure is the result of the coordinated expression  
20 of this system of machines in an appropriately configured biomechanical context, and is thus a  
21 problem in systems biology. Our demonstration of the role of CT in this system furthers our  
22 understanding and ability to study this system. Failure of amphibian blastopore closure is not a

1 “non-specific phenotype”, but result from a failure of some part of this system, which as we have  
2 shown here, can be teased apart biomechanically.

3

## 1 **METHODS**

### 2 ***Embryo culture, manipulation and explant construction***

3 *X. laevis* embryos were obtained and cultured by standard methods (Kay and Peng 1991),  
4 staged according to Nieuwkoop and Faber (Nieuwkoop and Faber 1967), and cultured in 1/3X  
5 MBS (Modified Barth's Saline). For explants made before stage 10 the embryos were tipped and  
6 marked to identify the dorsal side (Sive et al. 2000). Standard "giant" sandwich explants were  
7 made at stage 10 to 10.25 as described previously (Shook et al. 2004)(see also Figure 2-  
8 supplementary figure 2A), and modifications for Dorsal 180°, and Ventral 180° explants are  
9 described here (Figure 2A-E). Explants are cultured in Danilchik's for Amy (DFA) (Sater et al.  
10 1993). Ventralized giant explants were made from ventralized embryos (see below) (Figure  
11 2F,G) without reference to "dorsal" as these embryos are symmetrical about the blastopore  
12 (Scharf and Gerhart 1980)(Movie 1). "Unencumbered" explants were those without a load (e.g.  
13 unrestrained in the measuring apparatus, below). For explants made before bottle cells had  
14 formed, the vegetal endoderm was cut away from the circumblastoporal region just below the  
15 transition in cell size, above which most bottle cells will form (Keller 1981). Explants were  
16 staged by time elapsed from stage 10 control embryos, and when the dorsal bottle cells began to  
17 re-spread (stage 11) (Hardin and Keller 1988). Animal cap sandwiches were made from the  
18 ventral portion of the blastocoel roof of stage 10 embryos (not shown).

### 19 ***Ventralization of embryos.***

20 De-jellied embryos were placed in dishes made of 15 mm transverse sections of 60 mm  
21 diameter PVC pipe with Saran wrap stretched across the bottom, irradiated 6 or 7 minutes from  
22 below at about 35 minutes post fertilization on a UV trans-illuminator (analytical setting



1 (Fotodyne Inc. Model 3-3500) and left undisturbed for at least an hour to avoid accidentally  
2 rotating and thus dorsalizing them (Black and Gerhart 1986). Embryos were also ventralized by  
3 injecting  $\beta$ -catenin morpholino vegetally into the first two blastomeres (Heasman et al. 2000).  
4 Embryos forming bottle cells asymmetrically or earlier than the majority of ventralized embryos  
5 were discarded as being insufficiently ventralized. Control, ventralized embryos were cultured  
6 to control stage 35-38 and scored for their DAI (Kao and Elinson 1988) or to control stage 28  
7 and stained for dorsal markers (Appendix 2) to evaluate the effectiveness of ventralization.

### 8 ***Image analysis***

9 Explant morphometrics (see Appendix 3) were done with NIH Image 1.6 software (Wayne  
10 Rasband, National Institutes of Health; available at <http://rsb.info.nih.gov/nih-image/>;  
11 RRID:SCR\_003073), Object Image (Norbert Vischer, University of Amsterdam; available at  
12 <https://sils.fnwi.uva.nl/bcb/Object-Image/object-image.html>; RRID:SCR\_015720) or Image J  
13 (<http://rsb.info.nih.gov/ij/>; RRID:SCR\_003070).

### 14 ***“Tractor Pull” biomechanical measurement apparatus***

15 Explants were attached to two polyester shim stock strips (Small Parts, Inc. cat. # SHSP-010),  
16 both 25  $\mu$ m thick x 0.8 to 1.5 mm wide, and one, the “anchor”, 4 to 8 mm long, and the other, the  
17 “sled”, 3 to 5 mm long (Figure 2H). A cleat of shim stock (Small Parts, Inc. cat# SHSP-200), 500  
18  $\mu$ m thick x  $\sim$  500  $\mu$ m on a side, was glued to the sled with clear fingernail polish (Sally Hansen  
19 “Hard as Nails”) (Figure 2H). The anchor and sled were coated with fibronectin (Roche cat # 11  
20 080 938 00, at 20  $\mu$ g/ml, in 1/3X MBS for 30-60 minutes at 37°C) and inserted 0.5 to 1.0 mm  
21 (15-30% of the mediolateral extent of the explant) between the inner faces of the lateral ends of  
22 the sandwich to allow attachment (30-60 minutes) (Figure 2H). The explant was placed over a

1 window of cover glass (#1.5) in a 100 mm culture dish, and the anchor was attached to the  
2 window with high vacuum silicone grease (Dow Corning, Inc.) (Figure 2I). Using the stage  
3 controls, the cleat on the sled was moved adjacent to a calibrated optical fiber probe (40-50 mm  
4 by 120  $\mu\text{m}$ , Mouser, Inc. stock 571-5020821) mounted on the end of an aluminum rod fixed to an  
5 XYZ micromanipulator attached to an IX70 Olympus inverted microscope. The spring constants  
6 of these cantilever probes were calibrated by measuring deflection upon hanging short lengths  
7 of wire of known length/mass on a reference probe, which was then used to calibrate other  
8 probes. Five probes were made; the first two were discarded because of damage or  
9 unsuitability, probes #3 and #4 were used for measurements here, while probe #5 was used as  
10 the reference probe. Tension on the explant was measured by probe deflection recorded in  
11 high-resolution movies from below the window (40x objective, Olympus IZ70) and its behavior  
12 recorded simultaneously by time-lapse imaging from above (Olympus stereoscope). Glass beads  
13 (106  $\mu\text{m}$  diameter, Sigma Cat#G-4649) between the sled and the window and a 200 to 300  $\mu\text{m}$   
14 thick, 1% agarose bed between the explant and the window lowered friction (Figure 2I). (note:  
15 since doing these experiments, we have learned that beads of about 250  $\mu\text{m}$  diameter give lower  
16 friction). Probe drift and sled-substrate friction were characterized (Appendix 1).

### 17 ***Force Measurement Test***

18 Mediolateral tensile force was measured as the explants pulled the cleat of the sled against  
19 the probe. In most cases, the probe was placed adjacent to the cleat such that both probe and  
20 explant were unloaded at the start of the experiment. In others, the explant was “pre-strained”  
21 about 25%, by moving the cleat against the probe, and then away from it, or the explant was left  
22 under a pre-tension. Measurements were made to tailbud stages (~20hr) when the probe

1 deflection generally ceased to increase significantly. The cleat was then backed off from the  
2 probe to determine the resting position of the probe. Tension could be adjusted during a force  
3 measurement by moving the anchor away from or toward the sled, to decrease or increase strain  
4 (as in Figure 4 A-D).

5 Probe position was recorded every six minutes, and probe displacement was translated into  
6 force by the following:

$$7 \quad F_{(t)} = D_{(t)} \cdot M \cdot K_P \quad (1)$$

8 where D is displacement in pixels, M is the magnification scale in  $\mu\text{m}/\text{pixel}$  and  $K_P$  is the spring  
9 constant of the probe in  $\mu\text{N}/\mu\text{m}$ . Drift was determined from the unstressed position of the probe  
10 before and after the assay, the difference interpolated linearly over the duration of the test and  
11 subtracted from the probe movement. Means of force traces were plotted, with the mean of  
12 hourly intervals and the standard error of the hourly mean shown as error bars.

### 13 ***Structural Tensile Stiffness Measurement: Uniaxial Tensile Stress Relaxation Test***

14 For estimates of stiffness (Wiebe and Brodland 2005), anchor-explant-sled preparations  
15 were mounted as for force tests, and strain was applied along their mediolateral  
16 (circumblastoporal) axis by moving the stage  $300 \mu\text{m}$  (10-12% strain) over one to a few  
17 seconds. Relaxation was allowed for 5 minutes, the stage was withdrawn  $400 \mu\text{m}$  from the  
18 probe, and any further shape change were recorded (recovery). Probe positions were recorded  
19 every 0.5 to 30 seconds, and the anchor-explant-sled assembly was imaged every 1-10 seconds.  
20 The stage position was determined by a calibrated Metamorph image processor. The strain  
21 imposed on the explant was based on the relative position of two points in the explant that lay

1 above the medial edges of the attachment strips. The explants were tested periodically during  
2 gastrulation and neurulation with unstressed periods (> 1 hour) between tests.

3 We modeled the time (t) dependent structural stiffness (SS(t), Pascals) using the following  
4 viscoelastic spring and dashpot model (Findley et al. 1989; Moore et al. 1995b)(Appendix 4):

$$5 \quad SS(t) = S_{inf} + S_{sp} \cdot e^{(-t/\tau)} \quad (2)$$

6 where the parameters are  $S_{inf}$  or stiffness at infinite time (residual stiffness),  $S_{sp}$  or  
7 instantaneous stiffness, and  $\tau$ , the relaxation time constant, representing the half life of stress-  
8 relaxation.  $\varepsilon$ , the coefficient of viscosity, is related to  $\tau$  by:

$$9 \quad \varepsilon = \tau \cdot S_{inf}$$

10 The model assumes that instantaneous stiffness is reduced by viscous flow or remodeling of  
11 intra- or inter-cellular structures, until a residual stiffness, representing stable elastic elements  
12 of intra- or inter-cellular structure, is reached. SS(t) was calculated using the cross-sectional  
13 area of the tissue, force measurement, and observed strain over time, and two analytical  
14 techniques were used to generate the parameters  $S_{inf}$ ,  $S_{sp}$  and  $\tau$  (Appendix 5). Alternatively, an  
15 explant “spring stiffness” constant ( $K_E$ ) was also calculated. See Appendix 4 for further details.

## 16 **ACKNOWLEDGEMENTS**

17 We dedicate this work to the memory of two Professor Emeritus Antone G. Jacobson (1929-  
18 2017), University of Texas, Austin, a true pioneer in the biomechanical analysis of  
19 morphogenesis, notably its cellular basis and mechanical coupling between tissues (Jacobson  
20 and Gordon 1976), and to the memory of Professor Lev V. Beloussov (1935-2017), Lomonosov

1 Moscow State University, Moscow, whose insightful analysis of mechanical stresses in frog  
2 embryos (Beloussov et al. 1975) inspired this work. We thank Rudi Winklbauer and three  
3 anonymous reviewers for helpful suggestions that improved the manuscript.

#### 4 **COMPETING INTERESTS**

5 None of the authors have competing interests.

6

## 1 REFERENCES

- 2 Adams, D. S., R. Keller and M. A. R. Koehl (1990). "The mechanics of notochord  
3 elongation, straightening and stiffening in the embryo of *Xenopus laevis*."  
4 Development **110**: 115-130.
- 5 Belousov, L. V. (1990). "Mechanics of animal development." Riv Biol (THD) **83**(2-3):  
6 303-322, 227-345.
- 7 Belousov, L. V., J. G. Dorfman and V. G. Cherdantzev (1975). "Mechanical stresses and  
8 morphological patterns in amphibian embryos." J Embryol Exp Morphol **34**(3):  
9 559-574.
- 10 Benko, R. and G. W. Brodland (2007). "Measurement of in vivo stress resultants in  
11 neurulation-stage amphibian embryos." Ann Biomed Eng **35**(4): 672-681.  
12 DOI.org/10.1007/s10439-006-9250-1
- 13 Bertet, C., L. Sulak and T. Lecuit (2004). "Myosin-dependent junction remodelling  
14 controls planar cell intercalation and axis elongation." Nature **429**(6992): 667-  
15 671. DOI.org/10.1038/nature02590
- 16 Black, S. D. and J. C. Gerhart (1986). "High-frequency twinning of *Xenopus laevis*  
17 embryos from eggs centrifuged before first cleavage." Developmental Biology  
18 **116**: 228-240.
- 19 Bolce, M. E., A. Hemmati-Brivanlou, P. D. Kushner and R. M. Harland (1992). "Ventral  
20 ectoderm of *Xenopus* forms neural tissue, including hindbrain, in response to  
21 activin." Development **115**(3): 681-688.
- 22 Chen, W. T. (1981). "Mechanism of retraction of the trailing edge during fibroblast  
23 movement." J Cell Biol **90**(1): 187-200.
- 24 Chien, Y. H., R. Keller, C. Kintner and D. R. Shook (2015). "Mechanical strain  
25 determines the axis of planar polarity in ciliated epithelia." Curr Biol **25**(21):  
26 2774-2784. DOI.org/10.1016/j.cub.2015.09.015
- 27 David, R., O. Luu, E. W. Damm, J. W. Wen, M. Nagel and R. Winklbauer (2014). "Tissue  
28 cohesion and the mechanics of cell rearrangement." Development **141**(19):  
29 3672-3682. DOI.org/10.1242/dev.104315
- 30 Davidson, L. A. (1995). Biomechanics of Sea Urchin Primary Invagination. Biophysics.  
31 Berkeley, University of California at Berkeley: 227.
- 32 Davidson, L. A. (2008). "Integrating morphogenesis with underlying mechanics and  
33 cell biology." Curr Top Dev Biol **81**: 113-133. DOI.org/S0070-2153(07)81003-  
34 9 [pii]
- 35 10.1016/S0070-2153(07)81003-9
- 36 Davidson, L. A., A. M. Ezin and R. Keller (2002). "Embryonic wound healing by apical  
37 contraction and ingression in *Xenopus laevis*." Cell Motil Cytoskeleton **53**(3):  
38 163-176. DOI.org/10.1002/cm.10070
- 39 Davidson, L. A., R. Keller and D. W. Desimone (2004). "Assembly and remodeling of the  
40 fibrillar fibronectin extracellular matrix during gastrulation and neurulation in  
41 *Xenopus laevis*." Developmental Dynamics: An Official Publication Of The  
42 American Association Of Anatomists **231**(4): 888-895.  
43 DOI.org/10.1002/dvdy.20217

- 1 Davidson, L. A. and R. E. Keller (1999). "Neural tube closure in *Xenopus laevis* involves  
2 medial migration, directed protrusive activity, cell intercalation and  
3 convergent extension." Development **126**(20): 4547-4556.
- 4 Davidson, L. A., M. A. Koehl, R. Keller and G. F. Oster (1995). "How do sea urchins  
5 invaginate? Using biomechanics to distinguish between mechanisms of  
6 primary invagination." Development **121**(7): 2005-2018.
- 7 Davidson, L. A., G. F. Oster, R. E. Keller and M. A. Koehl (1999). "Measurements of  
8 mechanical properties of the blastula wall reveal which hypothesized  
9 mechanisms of primary invagination are physically plausible in the sea urchin  
10 *Strongylocentrotus purpuratus*." Developmental Biology (Orlando) **209**(2):  
11 221-238.
- 12 del Pino, E. M. (1996). "The expression of brachyury (T) during gastrulation in the  
13 marsupial frog *Gastrotheca riobambae*." Developmental Biology **177**: 64-72.
- 14 del Pino, E. M., M. Venegas-Ferrin, A. Romero-Carvajal, P. Montenegro-Larrea, N.  
15 Saenz-Ponce, I. M. Moya, I. Alarcon, N. Sudou, S. Yamamoto and M. Taira  
16 (2007). "A comparative analysis of frog early development." Proc Natl Acad Sci  
17 USA **104**(29): 11882-11888. DOI.org/10.1073/pnas.0705092104
- 18 Djiane, A., J. Riou, M. Umbhauer, J. Boucaut and D. Shi (2000). "Role of frizzled 7 in the  
19 regulation of convergent extension movements during gastrulation in *Xenopus*  
20 *laevis*." Development **127**: 3091-3100.
- 21 Domingo, C. and R. Keller (1995). "Induction of notochord cell intercalation behavior  
22 and differentiation by progressive signals in the gastrula of *Xenopus laevis*."  
23 Development **121**(10): 3311-3321.
- 24 Eagleson, G., K. Pfister, A. L. Knowlton, P. Skoglund, R. Keller and P. T. Stukenberg  
25 (2015). "Kif2a depletion generates chromosome segregation and pole  
26 coalescence defects in animal caps and inhibits gastrulation of the *Xenopus*  
27 embryo." Mol Biol Cell **26**(5): 924-937. DOI.org/10.1091/mbc.E13-12-0721
- 28 Elul, T. and R. Keller (2000). "Monopolar protrusive activity: a new morphogenic cell  
29 behavior in the neural plate dependent on vertical interactions with the  
30 mesoderm in *Xenopus*." Developmental Biology **224**(1): 3-19.
- 31 Elul, T., M. A. R. Koehl and R. Keller (1997). "Cellular mechanism underlying neural  
32 convergent extension in *Xenopus laevis* embryos." Developmental Biology **191**:  
33 243-258.
- 34 Ewald, A. J., S. M. Peyrot, J. M. Tyszka, S. E. Fraser and J. B. Wallingford (2004).  
35 "Regional requirements for Dishevelled signaling during *Xenopus* gastrulation:  
36 separable effects on blastopore closure, mesendoderm internalization and  
37 archenteron formation." Development (Cambridge, England) **131**(24): 6195-  
38 6209. DOI.org/10.1242/dev.01542
- 39 Ezin, A. M., P. Skoglund and R. Keller (2003). "The midline (notochord and notoplate)  
40 patterns the cell motility underlying convergence and extension of the  
41 *Xenopus* neural plate." Dev Biol **256**(1): 101-114.
- 42 Ezin, A. M., P. Skoglund and R. Keller (2006). "The presumptive floor plate (notoplate)  
43 induces behaviors associated with convergent extension in medial but not  
44 lateral neural plate cells of *Xenopus*." Developmental Biology **300**(2): 670-686.  
45 DOI.org/10.1016/j.ydbio.2006.09.004



- 1 Fernandez-Gonzalez, R., M. Simoes Sde, J. C. Roper, S. Eaton and J. A. Zallen (2009).  
2 "Myosin II dynamics are regulated by tension in intercalating cells." Dev Cell  
3 **17**(5): 736-743. DOI.org/10.1016/j.devcel.2009.09.003
- 4 Feroze, R., J. H. Shawky, M. von Dassow and L. A. Davidson (2015). "Mechanics of  
5 blastopore closure during amphibian gastrulation." Dev Biol **398**(1): 57-67.  
6 DOI.org/10.1016/j.ydbio.2014.11.011
- 7 Findley, W. N., J. S. Lai and K. Onaran (1989). Creep and relaxation of nonlinear  
8 viscoelastic materials. New York, Dover Publications, Inc.
- 9 Fouchard, J., D. Mitrossilis and A. Asnacios (2011). "Acto-myosin based response to  
10 stiffness and rigidity sensing." Cell Adh Migr **5**(1).  
11 DOI.org/10.4161/cam.5.1.13281
- 12 Fung, Y. C. (1993). Biomechanics : mechanical properties of living tissues. New York,  
13 Springer-Verlag.
- 14 Gerhart, J. and R. Keller (1986). "Region-specific cell activities in amphibian  
15 gastrulation." Annu Rev Cell Biol **2**: 201-229.
- 16 Glickman, N. S., C. B. Kimmel, M. A. Jones and R. J. Adams (2003). "Shaping the  
17 zebrafish notochord." Development **130**(5): 873-887.
- 18 Goto, T. and R. Keller (2002). "The planar cell polarity gene strabismus regulates  
19 convergence and extension and neural fold closure in *Xenopus*." Dev Biol  
20 **247**(1): 165-181.
- 21 Habas, R., I. B. Dawid and X. He (2003). "Coactivation of Rac and Rho by Wnt/Frizzled  
22 signaling is required for vertebrate gastrulation." Genes & Development **17**(2):  
23 295-309.
- 24 Habas, R., Y. Kato and X. He (2001). "Wnt/Frizzled activation of Rho regulates  
25 vertebrate gastrulation and requires a novel Formin homology protein  
26 Daam1." Cell **107**(7): 843-854.
- 27 Hardin, J. (1988). "The role of secondary mesenchyme cells during sea urchin  
28 gastrulation studied by laser ablation." Development **103**(2): 317-324.
- 29 Hardin, J. and R. Keller (1988). "The behaviour and function of bottle cells during  
30 gastrulation of *Xenopus laevis*." Development **103**(1): 211-230.
- 31 Hardin, J. D. and L. Y. Cheng (1986). "The Mechanisms and Mechanics of Archenteron  
32 Elongation during Sea-Urchin Gastrulation." Developmental Biology **115**(2):  
33 490-501.
- 34 Harris, A. R., J. Bellis, N. Khalilgharibi, T. Wyatt, B. Baum, A. J. Kabla and G. T. Charras  
35 (2013). "Generating suspended cell monolayers for mechanobiological  
36 studies." Nat Protoc **8**(12): 2516-2530. DOI.org/10.1038/nprot.2013.151
- 37 Harris, A. R., L. Peter, J. Bellis, B. Baum, A. J. Kabla and G. T. Charras (2012).  
38 "Characterizing the mechanics of cultured cell monolayers." Proc Natl Acad Sci  
39 U S A **109**(41): 16449-16454. DOI.org/10.1073/pnas.1213301109
- 40 Heasman, J., M. Kofron and C. Wylie (2000). "Beta-catenin signaling activity dissected  
41 in the early *Xenopus* embryo: a novel antisense approach." Dev Biol **222**(1):  
42 124-134.
- 43 Hutson, M. S., Y. Tokutake, M.-S. Chang, J. W. Bloor, S. Venakides, D. P. Kiehart and G. S.  
44 Edwards (2003). "Forces for morphogenesis investigated with laser  
45 microsurgery and quantitative modeling." Science **300**(5616): 145-149.



- 1 Irvine, K. D. and E. Wieschaus (1994). "Cell intercalation during *Drosophila* germband  
2 extension and its regulation by pair-rule segmentation genes." Development  
3 **120**(4): 827-841.
- 4 Jacobson, A. G. and R. Gordon (1976). "Changes in the shape of the developing  
5 vertebrate nervous system analyzed experimentally, mathematically and by  
6 computer simulation." J Exp Zool **197**(2): 191-246.
- 7 Jessen, J. R., J. Topczewski, S. Bingham, D. S. Sepich, F. Marlow, A. Chandrasekhar and  
8 L. Solnica-Krezel (2002). "Zebrafish trilobite identifies new roles for  
9 Strabismus in gastrulation and neuronal movements." Nat Cell Biol **4**(8): 610-  
10 615. DOI.org/10.1038/ncb828
- 11 Joshi, S. D., M. von Dassow and L. A. Davidson (2010). "Experimental control of  
12 excitable embryonic tissues: three stimuli induce rapid epithelial contraction."  
13 Exp Cell Res **316**(1): 103-114. DOI.org/10.1016/j.yexcr.2009.08.005
- 14 Kamm, R. D. (2006). "The role of molecular mechanics in intracellular signaling:  
15 Mechanisms and models." Journal of Biomechanics **39**, supplement 1: S4.  
16 DOI.org/10.1016/S0021-9290(06)82879-4
- 17 Kao, K. R. and R. P. Elinson (1988). "The entire mesodermal mantle behaves as  
18 Spemann organizer in dorsoanterior enhanced *Xenopus laevis* embryos."  
19 Developmental Biology **127**: 64-77.
- 20 Kay, B. K. and H. B. Peng (1991). Methods in Cell Biology. New York, Academic Press.
- 21 Keller, R., M. S. Cooper, M. Danilchik, P. Tibbetts and P. A. Wilson (1989). "Cell  
22 intercalation during notochord development in *Xenopus laevis*." J Exp Zool  
23 **251**(2): 134-154.
- 24 Keller, R. and M. Danilchik (1988). "Regional expression, pattern and timing of  
25 convergence and extension during gastrulation of *Xenopus laevis*."  
26 Development **103**(1): 193-209.
- 27 Keller, R., L. Davidson, A. Edlund, T. Elul, M. Ezin, D. Shook and P. Skoglund (2000).  
28 "Mechanisms of convergence and extension by cell intercalation." Philos Trans  
29 R Soc Lond B Biol Sci **355**(1399): 897-922. DOI.org/10.1098/rstb.2000.0626
- 30 Keller, R., L. A. Davidson and D. R. Shook (2003). "How we are shaped: The  
31 biomechanics of gastrulation." Differentiation **71**: 171-205.  
32 DOI.org/10.1046/j.1432-0436.2003.710301.x
- 33 Keller, R. and D. Shook (2004). Gastrulation in Amphibians. Gastrulation: From Cells  
34 to Embryo. C. D. Stern. Cold Spring Harbor, NY, Cold Spring Harbor Laboratory  
35 Press: 171-204.
- 36 Keller, R., D. Shook and P. Skoglund (2008). "The forces that shape embryos: physical  
37 aspects of convergent extension by cell intercalation." Phys Biol **5**(1): 15007.  
38 DOI.org/10.1088/1478-3975/5/1/015007
- 39 Keller, R. and P. Tibbetts (1989). "Mediolateral cell intercalation in the dorsal, axial  
40 mesoderm of *Xenopus laevis*." Dev Biol **131**(2): 539-549.
- 41 Keller, R. and R. Winklbauer (1992). "Cellular basis of amphibian gastrulation."  
42 Current Topics in Developmental Biology **27**: 39-89.
- 43 Keller, R. E. (1975). "Vital dye mapping of the gastrula and neurula of *Xenopus laevis*.  
44 I. Prospective areas and morphogenetic movements of the superficial layer."  
45 Developmental Biology **42**(2): 222-241.

- 1 Keller, R. E. (1976). "Vital dye mapping of the gastrula and neurula of *Xenopus laevis*.  
2 II. Prospective areas and morphogenetic movements of the deep layer."  
3 Developmental Biology **51**(1): 118-137.
- 4 Keller, R. E. (1980). "The cellular basis of epiboly: an SEM study of deep-cell  
5 rearrangement during gastrulation in *Xenopus laevis*." J Embryol Exp Morphol  
6 **60**: 201-234.
- 7 Keller, R. E. (1981). "An experimental analysis of the role of bottle cells and the deep  
8 marginal zone in gastrulation of *Xenopus laevis*." Journal of Experimental  
9 Zoology **216**(1): 81-101.
- 10 Keller, R. E. (1984). "The cellular basis of gastrulation in *Xenopus laevis*: active,  
11 postinvolution convergence and extension by mediolateral interdigitation."  
12 Amer. Zool. **24**: 589-603.
- 13 Kim, Y., M. Hazar, D. S. Vijayraghavan, J. Song, T. R. Jackson, S. D. Joshi, W. C. Messner,  
14 L. A. Davidson and P. R. LeDuc (2014). "Mechanochemical actuators of  
15 embryonic epithelial contractility." Proc Natl Acad Sci U S A **111**(40): 14366-  
16 14371. DOI.org/10.1073/pnas.1405209111
- 17 Kintner, C. R. and J. P. Brookes (1984). "Monoclonal antibodies identify blastemal cells  
18 derived from dedifferentiating muscle in newt limb." Nature **308**: 67-69.
- 19 Koehl, M. A. R. (1990). "Biomechanical approaches to morphogenesis." Seminars in  
20 Developmental Biology **1**: 367-378.
- 21 Kushner, P. D. (1984). "A Library of Monoclonal-Antibodies to Torpedo Cholinergic  
22 Synaptosomes." Journal of Neurochemistry **43**(3): 775-786.
- 23 Lane, M. C. and R. Keller (1997). "Microtubule disruption reveals that Spemann's  
24 organizer is subdivided into two domains by the vegetal alignment zone."  
25 Development **124**: 895-906.
- 26 Lang, M. (2007). "Lighting up the mechanome." Bridge **37**: 11-16.
- 27 Layton, A. T., Y. Toyama, G. Q. Yang, G. S. Edwards, D. P. Kiehart and S. Venakides  
28 (2009). "Drosophila morphogenesis: tissue force laws and the modeling of  
29 dorsal closure." Hfsp J **3**(6): 441-460. DOI.org/10.2976/1.3266062
- 30 Lin, F., D. S. Sepich, S. Chen, J. Topczewski, C. Yin, L. Solnica-Krezel and H. Hamm  
31 (2005). "Essential roles of G $\alpha$ <sub>12/13</sub> signaling in distinct cell behaviors  
32 driving zebrafish convergence and extension gastrulation movements." J Cell  
33 Biol **169**(5): 777-787. DOI.org/10.1083/jcb.200501104
- 34 Luu, O., R. David, H. Ninomiya and R. Winklbauer (2011). "Large-scale mechanical  
35 properties of *Xenopus* embryonic epithelium." Proc Natl Acad Sci U S A  
36 **108**(10): 4000-4005. DOI.org/10.1073/pnas.1010331108
- 37 Ma, X., H. E. Lynch, P. C. Scully and M. S. Hutson (2009). "Probing embryonic tissue  
38 mechanics with laser hole drilling." Phys Biol **6**(3): 036004.  
39 DOI.org/10.1088/1478-3975/6/3/036004
- 40 Marsden, M. and D. W. DeSimone (2001). "Regulation of cell polarity, radial  
41 intercalation and epiboly in *Xenopus*: novel roles for integrin and fibronectin."  
42 Development **128**(18): 3635-3647.
- 43 Martin, A. C., M. Gelbart, R. Fernandez-Gonzalez, M. Kaschube and E. F. Wieschaus  
44 (2010). "Integration of contractile forces during tissue invagination." Journal of  
45 Cell Biology **188**(5): 735-749. DOI.org/10.1083/jcb.200910099

- 1 Moore, S. W. (1994). "A fiber optic system for measuring dynamic mechanical  
2 properties of embryonic tissues." *IEEE Trans Biomed Eng* **41**(1): 45-50.
- 3 Moore, S. W., R. E. Keller and M. A. Koehl (1995a). "The dorsal involuting marginal  
4 zone stiffens anisotropically during its convergent extension in the gastrula of  
5 *Xenopus laevis*." *Development* **121**(10): 3131-3140.
- 6 Moore, S. W., R. E. Keller and M. A. R. Koehl (1995b). "The dorsal involuting marginal  
7 zone stiffens anisotropically during its convergent extension in the gastrula of  
8 *Xenopus laevis*." *Development* **121**(10): 3131-3140.
- 9 Munro, E. M. and G. M. Odell (2002). "Polarized basolateral cell motility underlies  
10 invagination and convergent extension of the ascidian notochord."  
11 *Development* **129**(1): 13-24.
- 12 Nieuwkoop, P. D. and J. Faber (1967). *Normal Table of Xenopus laevis (Daudin)*.  
13 Amsterdam, North Holland Publishing Company.
- 14 Ossipova, O., C. W. Chu, J. Fillatre, B. K. Brott, K. Itoh and S. Y. Sokol (2015). "The  
15 involvement of PCP proteins in radial cell intercalations during *Xenopus*  
16 embryonic development." *Dev Biol*. DOI.org/10.1016/j.ydbio.2015.06.013
- 17 Ossipova, O., K. Kim, B. B. Lake, K. Itoh, A. Ioannou and S. Y. Sokol (2014). "Role of  
18 Rab11 in planar cell polarity and apical constriction during vertebrate neural  
19 tube closure." *Nat Commun* **5**: 3734. DOI.org/10.1038/ncomms4734
- 20 Poznanski, A., S. Minsuk, D. Stathopoulos and R. Keller (1997). "Epithelial cell wedging  
21 and neural trough formation are induced planarly in *Xenopus*, without  
22 persistent vertical interactions with mesoderm." *Developmental Biology* **189**:  
23 256-269.
- 24 Priess, J. R. and D. I. Hirsh (1986). "Caenorhabditis elegans morphogenesis: the role of  
25 the cytoskeleton in elongation of the embryo." *Dev Biol* **117**(1): 156-173.
- 26 Rodriguez-Diaz, A., Y. Toyama, D. L. Abravanel, J. M. Wiemann, A. R. Wells, U. S. Tulu, G.  
27 S. Edwards and D. P. Kiehart (2008). "Actomyosin purse strings: renewable  
28 resources that make morphogenesis robust and resilient." *Hfsp J* **2**(4): 220-  
29 237. DOI.org/10.2976/1.2955565
- 30 Rolo, A., P. Skoglund and R. Keller (2009). "Morphogenetic movements driving neural  
31 tube closure in *Xenopus* require myosin IIB." *Dev Biol* **327**(2): 327-338.  
32 DOI.org/10.1016/j.ydbio.2008.12.009
- 33 Sater, A. K., R. A. Steinhardt and R. Keller (1993). "Induction of neuronal  
34 differentiation by planar signals in *Xenopus* embryos." *Developmental*  
35 *Dynamics* **197**: 268-280.
- 36 Scharf, S. R. and J. C. Gerhart (1980). "Determination of the dorsal-ventral axis in eggs  
37 of *Xenopus laevis*: complete rescue of uv-impaired eggs by oblique orientation  
38 before first cleavage." *Dev Biol* **79**(1): 181-198.
- 39 Schechtman, A. M. (1942). "The mechanism of amphibian gastrulation. I. Gastrulation-  
40 promoting interactions between various region of an anuran egg (*Hyla*  
41 *regilla*)." *Univ. Calif. Publ. Zool.* **51**: 1-39.
- 42 Schroeder, T. E. (1971). "Mechanisms of morphogenesis: the embryonic neural tube."  
43 *International Journal of Neuroscience* **2**(4): 183-197.
- 44 Sherrod, P. H. (1995). Nonlinear Regression Analysis Program (NLREG). Nashville, TN.
- 45 Shih, J. and R. Keller (1992a). "Cell motility driving mediolateral intercalation in  
46 explants of *Xenopus laevis*." *Development* **116**(4): 901-914.

- 1 Shih, J. and R. Keller (1992b). "Patterns of cell motility in the organizer and dorsal  
2 mesoderm of *Xenopus laevis*." Development **116**(4): 915-930.
- 3 Shook, D. R., C. Majer and R. Keller (2004). "Pattern and morphogenesis of  
4 presumptive superficial mesoderm in two closely related species, *Xenopus*  
5 *laevis* and *Xenopus tropicalis*." Developmental Biology **270**(1): 163-185.
- 6 Shook, D. R., J. Wen, A. Rolo, B. Francica, D. Dobins, P. Skoglund, D. DeSimone, R.  
7 Winklbauer and R. Keller (2018). "Characterization of convergent thickening, a  
8 major convergence force producing morphogenic movement in amphibians."  
9 bioRxiv. DOI.org/10.1101/270892
- 10 Sive, H., R. Grainger and R. Harland (2000). Early development of *Xenopus laevis*: a  
11 laboratory manual. Cold Spring Harbor, NY, Cold Spring Harbor Laboratory  
12 Press.
- 13 Skoglund, P., B. Dzamba, C. R. Coffman, W. A. Harris and R. Keller (2006). "Xenopus  
14 fibrillin is expressed in the organizer and is the earliest component of matrix at  
15 the developing notochord-somite boundary." Dev Dyn **235**(7): 1974-1983.  
16 DOI.org/10.1002/dvdy.20818
- 17 Solon, J., A. Kaya-Copur, J. Colombelli and D. Brunner (2009). "Pulsed forces timed by a  
18 ratchet-like mechanism drive directed tissue movement during dorsal  
19 closure." Cell **137**(7): 1331-1342. DOI.org/10.1016/j.cell.2009.03.050
- 20 Stern, C. D., Ed. (2004). Gastrulation: From Cells to Embryo. Cold Spring Harbor, NY,  
21 Cold Spring Harbor Laboratory Press.
- 22 Szabo, A., I. Cobo, S. Omara, S. McLachlan, R. Keller and R. Mayor (2016). "The  
23 Molecular Basis of Radial Intercalation during Tissue Spreading in Early  
24 Development." Dev Cell **37**(3): 213-225.  
25 DOI.org/10.1016/j.devcel.2016.04.008
- 26 Tada, M. and J. C. Smith (2000). "Xwnt11 is a target of *Xenopus* Brachyury: regulation  
27 of gastrulation movements via Dishevelled, but not through the canonical Wnt  
28 pathway." Development **127**(10): 2227-2238.
- 29 Toyama, Y., X. G. Peralta, A. R. Wells, D. P. Kiehart and G. S. Edwards (2008). "Apoptotic  
30 force and tissue dynamics during *Drosophila* embryogenesis." Science  
31 **321**(5896): 1683-1686. DOI.org/10.1126/science.1157052
- 32 Varner, V. D., D. A. Voronov and L. A. Taber (2010). "Mechanics of head fold formation:  
33 investigating tissue-level forces during early development." Development  
34 **137**(22): 3801-3811. DOI.org/10.1242/dev.054387
- 35 von Dassow, M. and L. A. Davidson (2009). "Natural variation in embryo mechanics:  
36 gastrulation in *Xenopus laevis* is highly robust to variation in tissue stiffness."  
37 Dev Dyn **238**(1): 2-18. DOI.org/10.1002/dvdy.21809
- 38 Wallingford, J. B., B. A. Rowning, K. M. Vogeli, U. Rothbacher, S. E. Fraser and R. M.  
39 Harland (2000). "Dishevelled controls cell polarity during *Xenopus*  
40 gastrulation." Nature **405**(6782): 81-85.
- 41 Wiebe, C. and G. W. Brodland (2005). "Tensile properties of embryonic epithelia  
42 measured using a novel instrument." J Biomech **38**(10): 2087-2094.
- 43 Williams, M., W. Yen, X. Lu and A. Sutherland (2014). "Distinct apical and basolateral  
44 mechanisms drive planar cell polarity-dependent convergent extension of the  
45 mouse neural plate." Dev Cell **29**(1): 34-46.  
46 DOI.org/10.1016/j.devcel.2014.02.007

- 1 Williams-Masson, E. M., P. J. Heid, C. A. Lavin and J. Hardin (1998). "The cellular  
2 mechanism of epithelial rearrangement during morphogenesis of the  
3 *Caenorhabditis elegans* dorsal hypodermis." Dev Biol **204**(1): 263-276.  
4 DOI.org/10.1006/dbio.1998.9048
- 5 Wilson, P. and R. Keller (1991). "Cell rearrangement during gastrulation of *Xenopus*:  
6 direct observation of cultured explants." Development **112**(1): 289-300.
- 7 Wilson, P. A., G. Oster and R. Keller (1989). "Cell rearrangement and segmentation in  
8 *Xenopus*: Direct observation of cultured explants." Development **105**: 155-166.
- 9 Winklbauer, R. and M. Nagel (1991). "Directional mesoderm cell migration in the  
10 *Xenopus* gastrula." Developmental Biology **148**: 573-589.
- 11 Winklbauer, R. and M. Schuerfeld (1999). "Vegetal rotation, a new gastrulation  
12 movement involved in the internalization of the mesoderm and endoderm in  
13 *Xenopus*." Development **126**: 3703-3713.
- 14 Yen, W. W., M. Williams, A. Periasamy, M. Conaway, C. Burdsal, R. Keller, X. Lu and A.  
15 Sutherland (2009). "PTK7 is essential for polarized cell motility and  
16 convergent extension during mouse gastrulation." Development **136**(12):  
17 2039-2048. DOI.org/10.1242/dev.030601
- 18 Zhou, J., H. Y. Kim and L. A. Davidson (2009). "Actomyosin stiffens the vertebrate  
19 embryo during crucial stages of elongation and neural tube closure."  
20 Development **136**(4): 677-688. DOI.org/10.1242/dev.026211
- 21 Zhou, J., H. Y. Kim, J. H. Wang and L. A. Davidson (2010). "Macroscopic stiffening of  
22 embryonic tissues via microtubules, RhoGEF and the assembly of contractile  
23 bundles of actomyosin." Development **137**(16): 2785-2794.  
24 DOI.org/10.1242/dev.045997
- 25 Zhou, J., S. Pal, S. Maiti and L. A. Davidson (2015). "Force production and mechanical  
26 accommodation during convergent extension." Development **142**(4): 692-701.  
27 DOI.org/10.1242/dev.116533

28

29



## 1 TABLES

|                                               | Average Rate of Convergence ( $\mu\text{m}/\text{min}$ ) (n) | Average Rate of Convergence (%/hr) (n) (SEM) | Strain of Dorsal tissue (%/hr) (n) (SEM) | Strain of LV tissue (%/hr) (n) (SEM) | Shear w.r.t. attachment strips (%/hr) |
|-----------------------------------------------|--------------------------------------------------------------|----------------------------------------------|------------------------------------------|--------------------------------------|---------------------------------------|
| Intact embryo, LI, 2 to 7 hours               | 10<br>(2 to 7)                                               | 17.5<br>(2 to 7)<br>(1.8)                    |                                          |                                      |                                       |
| Giant explant, unencumbered, LI, 0 to 7 hours | 5<br>(3 to 10)                                               | 10<br>(3 to 10)<br>(1.5)                     |                                          |                                      |                                       |
| Standard pull, probe 3 (2 to 7.5 h)           |                                                              | 4.1<br>(4 to 5)<br>(0.7)                     | -7.2<br>(6)<br>(1.5)                     | 1.1<br>(6)<br>(1.5)                  | 3.7                                   |
| Standard pull, probe 3 (7.5 to 10.5 h)        |                                                              | 2.5<br>(5)<br>(0.8)                          | -7.0<br>(6)<br>(2.1)                     | 1.7<br>(6)<br>(1.9)                  | 2.5                                   |
| Standard pull, probe 3 (10.5 to 15.5)         |                                                              | 3.7<br>(5)<br>(0.7)                          | -5.5<br>(6)<br>(1.6)                     | -0.5<br>(6)<br>(1.3)                 | 3.2                                   |
| Standard pull, probe 4 (2.5 to 7.5 h)         |                                                              | 4.5<br>(2 to 4)<br>(0.7)                     |                                          |                                      | 3.1                                   |
| Standard pull, probe 4 (7.5 to 10.5 h)        |                                                              | 1.7<br>(4)<br>(0.8)                          |                                          |                                      | 1.7                                   |
| Standard pull, probe 4 (10.5 to 16.5)         |                                                              | 3.0<br>(4)<br>(0.6)                          |                                          |                                      | 2.1                                   |

2

3 Table 1. Convergence and strain. Negative strains indicate convergence. "Standard Pull" refers  
4 to standard giant explants that have developed tension within the tractor pull apparatus.

5

6

7

1

| Time from onset of gastrulation (hours) | Force ( $\mu\text{N}$ (n, +/- SEM)) | Effective SSA ( $\text{mm}^2$ (n, +/- SEM)) | Estimated Force/cell (nN) | Force per effective SSA (Pascals) |
|-----------------------------------------|-------------------------------------|---------------------------------------------|---------------------------|-----------------------------------|
| 1                                       | 0.25 (3, 0.08)                      | 0.12 (1, n/a)                               | 1.3                       | 2.1                               |
| 2.1                                     | 0.31 (3, 0.09)                      | 0.11 (4, 0.014)                             | 1.7                       | 2.8                               |
| 2.9                                     | 0.49 (4, 0.16)                      | 0.13 (4, 0.018)                             | 2.3                       | 3.8                               |
| 4.3                                     | 0.94 (4, 0.04)                      | 0.27 (3, 0.024)                             | 2.2                       | 3.5                               |
| 6.5                                     | 1.6 (5, 0.11)                       | 0.41 (3, 0.020)                             | 2.5                       | 3.9                               |
| 11.8                                    | 2.6 (6, 0.19)                       | 0.68 (3, 0.051)                             | 2.4                       | 3.8                               |

2 Table 2. Estimates of force per cell and tensional stress within effective sagittal section area  
3 (SSA) (deep mesoderm only). Based on a mean cell sectional area of  $625 \text{ nm}^2$ .

4

5

6

1 **FIGURE LEGENDS**

2 **Figure 1. Diagrams illustrate the spatial and temporal aspects of the expression of**  
3 **Convergent Thickening (CT) and Convergent Extension (CE) in embryos and explants.**

4 In the top panel, a vegetal view at the onset of gastrulation (A; Movie 1, 285 min) shows  
5 expression of CT (white symbols, implying circumferential convergence and thickening  
6 perpendicular to the surface of the embryo) in the Involuting Marginal Zone (IMZ), and the effect  
7 of its convergence in producing involution (black arrows) and blastopore closure (green arrows,  
8 A). A cutaway of the dorsal sector of a midgastrula, showing post-involution IMZ tissues (B). An  
9 enlargement (C) show the onset of CE (green arrows = convergence, blue arrow = the resulting  
10 extension). CE is produced by expression of mediolateral intercalation behavior (MIB) which is  
11 expressed initially in the shape of an arc of elongated, intercalating cells (the Vegetal Alignment  
12 Zone, VAZ) attached at both ends (asterisks) to the vegetal endoderm (VE) in the region of the  
13 bottle cell (BCs). A vegetal view of the late gastrula (D; Movie 1, 525 min) shows continued  
14 expression of CT in the IMZ. A cutaway of the same stage (E) shows the progressive, posterior  
15 expansion of the array of MIB-expressing cells, which advances with the closing blastopore as  
16 more cells involute and are added to the array. MIB arcing across the inside of the blastopore  
17 (flanked by asterisks) drives CE that acts with CT outside to close the blastopore. Enlargement  
18 (F) showing a cross-section at the level of the yellow bar in (E) showing continued expression of  
19 MIB anteriorly, which converges and extends the post-involution notochordal and somitic  
20 mesoderm along the length of the axis, which lies between the posterior neural plate and the  
21 gastrocoel roof (GR) in embryos.



1 In the middle panel, diagrams of explants of the circumblastoporal region show expression of CT  
2 movements at the early gastrula (G-H; Movie 4, 12:26:04 to 13:46:56), the onset of CE (and MIB)  
3 to form the VAZ at the midgastrula stage (I), and the posterior progression of CE/MIB, as cells  
4 expressing CT transition into expressing MIB and CE (J; Movie 4, after 13:46:56). In explants,  
5 MIB/CE pulls the unanchored lateral margin of the somitic mesoderm medially while extending  
6 and narrowing the somitic and notochordal mesoderm (I-J). CT feeds cells into the A-P  
7 progressive expression of MIB (I-J). Note that MIB occurs in the deep layers of the IMZ,  
8 underneath the superficial epithelium, so is not visible in movies of explants shown here,  
9 although the resulting CE movements are visible.

10 The bottom panel shows the progressive transition of cells expressing CT to expressing CE and  
11 MIB from anterior to posterior (yellow arrows) and the progressive pattern of anterior-to-  
12 posterior hoop stress (green hoops) in explants at the midgastrula stage (K), the late gastrula (L)  
13 and the presumptive pattern mapped on the midgastrula embryo (M).

14 The last panel shows expression of CT in ventralized embryos, which lack presumptive somitic,  
15 notochordal and neural tissue, and thus lacking CE/MIB, and express only CT, which closes the  
16 blastopore symmetrically (N-vegetal view; O-sectional view). Explants from such embryos show  
17 only CT (P-Q, Movie 3).

18 Presumptive tissues are indicated (orange- head, heart, lateroventral mesoderm; magenta-  
19 notochord; red- somitic mesoderm ; dark blue-posterior neural, hindbrain, spinal cord; light  
20 blue-forebrain; gray-epidermis; yellow- vegetal endoderm). Shading from dark to light, where  
21 used, indicates progressively more anterior (A) to posterior (P) position, respectively.

22

1 **Figure. 2. Explant construction.**

2 Giant sandwich explants are made by cutting early gastrula stage embryos mid-ventrally, then  
3 vegetally just below the lower edge of the IMZ, such that the bottle cells are included, then  
4 animally roughly 30° above the equator (dashed lines, A; see also Figure 2-supplementary figure  
5 2). Two such explants are then recombined, inner face to inner face, to make a Giant Sandwich  
6 explant (B, H). Giant explants contain presumptive notochordal mesoderm (magenta), somitic  
7 mesoderm (red), posterior neural tissue (hindbrain-spinal cord), as well as presumptive brain  
8 (light blue), epidermis (grey), and migratory leading edge mesoderm (orange). Dorsal 180°  
9 explants are made the same way as standard giant explants, with the right and left quarters cut  
10 off (C). Ventral 180° sandwich explants are constructed similarly, except the IMZ is cut dorsally  
11 rather than ventrally (dashed lines, D). Ventralized giant explants are made from UV irradiated  
12 embryos, and thus they form no or very limited dorsal tissues (F, G). For mechanical  
13 measurements with the tractor-pull apparatus, the two halves of the sandwich are apposed with  
14 their inner, deep surfaces next to one another, with fibronectin coated plastic strips, one bearing  
15 a raised cleat, inserted at each end (H). The explant is allowed to heal and attach to the strips,  
16 and then positioned above a cover slip window in a culture chamber (I). The stationary “anchor”  
17 strip is attached to the window with silicone high vacuum grease (magenta), and the explant is  
18 placed over an agarose pad (green). The moveable “sled” strip rests on glass beads resting on a  
19 cover slip filler layer (blue). An XYZ positioner is used to move a calibrated optical fiber probe,  
20 mounted on an aluminum bar, near the cleat, and the imaging chamber, which rests on a  
21 motorized stage, is then moved such that the cleat is as close to the probe tip as possible without  
22 deflecting the probe (See Movie 2).

1

2 **Figure 2-supplementary figure 1. Comparison of convergence along the limit of**  
3 **involution (LI).**

4 (A) The rates of convergence along the circumference or mediolateral extent of the LI  
5 in whole embryos, unencumbered giants and giants in tractor pulls under probe #3 or  
6 4. (B) The extent of convergence at the limit of involution by G+7.5h of giant  
7 sandwich explants is retarded in the tractor pull (right), compared to an  
8 unencumbered giant (left). Red lines indicate the position of the strips.

9 **Figure 2-supplementary figure 1-source data legend:** Source data for  
10 Convergence Rates.

11

12 **Figure 2-supplementary figure 2. Convergence during explant construction.**

13 Embryos rapidly contract along their circumferential axis upon being cut. An example  
14 is shown (A), tracing the length of the equatorial (yellow) and sub-equatorial (cyan)  
15 circumference of the embryo, corresponding roughly to the limit of involution and the  
16 middle of the marginal zone. Stills are shown immediately before (0') and one minute  
17 after the embryo is initially cut (1', arrow head), after the removal of further vegetal  
18 endoderm at two minutes (2') and after flattening (3'), in preparation to construct a  
19 giant sandwich. Scale bar = 1mm. Comparing the circumferential lengths to that  
20 immediately prior to cutting (B; "Proportion" = proportion of initial length) shows a  
21 rapid contraction along the mediolateral (former circumferential) axis. The explant in

1 A was combined with another such explant to make a giant sandwich and gently  
2 pressed together under a cover glass to heal.

3 **Figure 2-supplementary figure 2-source data legend:** Source data for  
4 Convergence during explant construction.

5

6 **Figure 2-supplementary figure 3. Comparison of morphogenesis in embryos,**  
7 **giants and tractor pulls.**

8 Intact embryos (top) are compared to unencumbered giants (middle) and standard  
9 giants in tractor pulls (bottom). Time of controls are as indicated at bottom. Scale for  
10 embryos = 250  $\mu\text{m}$ , for giants and tractor pulls = 1 mm.

11

12 **Figure 2-supplementary figure 4. Notochordal and somitic tissue in tractor pull**  
13 **explants.**

14 Sandwich explants used in tractor pulls were fixed after the force measurement assay  
15 was finished (stage 25-30) (A, E, I, M) and stained for somitic tissue with the 12/101  
16 antibody (B, F, J, N) and for notochordal tissue with the Tor70 antibody (C, G, K, O).  
17 The two staining patterns are also shown juxtaposed D, H, L, P). In a standard giant  
18 explant (A-D), a dorsal 180° explant (E-H) and a standard giant explant that had  
19 additional tension imposed on it (0.6 $\mu\text{N}$ , at G+5h) (I-L), both somitic and notochordal  
20 staining are evident. In a ventral 180° explant, (M-P) a small amount of somitic tissue

1 at the lateral edge of the explant is observed, but no notochordal tissue. Tor70 signal  
2 in 0 is typical of that seen in the remnant of the blastocoel cavity of ventralized  
3 embryos with no axial tissues, and does not correspond to notochordal tissue. Scale  
4 bars = 1mm.

5

### 6 **Figure 3. Force vs. time traces for tractor pulls.**

7 Mean force production over time is indicated (A-D; solid lines). Time is measured from the onset  
8 of gastrulation at stage 10, and the correspondence with developmental stage is shown (E).  
9 Hourly means are shown as symbols, with standard errors of the hourly means indicated. The  
10 onset of individual traces represents the time at which the sled was initially pulled against the  
11 probe, with the exception of the Animal Cap explants. All pulls were against probe #3, except  
12 “Standard Giants, probe #4” (green, A and D) and the “Ventralized Giants” and “Ventral 180s”  
13 (orange and yellow respectively, D). The force trace for Standard Giant explants vs. probe #3  
14 (blue) is included for all graphs except where only probe #4 was used (D). Gaps in force traces  
15 represent points at which different numbers of explants are included in the mean force trace.  
16 Controls (A) included Standard Giant sandwich explants (vs. probe #3, dark blue, n = 2 up to 2  
17 hours, n = 4 through 15 hours; vs. probe #4, green, n = 6 through 12 hours, n = 5 through 18  
18 hours), Animal Cap sandwich explants (purple, n = 4 from 5 to 17 hours, 2 to 3 otherwise). Early  
19 and Late tractor pulls (B) include Early Giant explants (from stage 10; light blue, n = 3) and Late  
20 Giant explants (from stage 12.5 ; purple, n = 5). Dorsal tractor pulls (C) include Dorsal 180°  
21 explants (pink, n = 3). Ventral tractor pulls (D) include UV ventralized explants (orange, n = 3 at  
22 4 hours, 4 from 5 to 7 hours, 5 from 8 to 9 hours and 4 from 10 to 20 hours), ventral 180°

1 explants (yellow, n = 3 at 3 hours, 4 from 4 to 20 hours) and are compared to Standard Giant  
2 explants vs. probe #4.

3

4 **Figure 3-supplementary figure 1. Plots of all the individual force traces.**

5 For each tractor pull condition, the force traces of each pull are plotted (thin lines), as  
6 well as the mean of the pulls (thick line), with error bars representing standard error.

7 The accuracy of the plots along the time axis is approximately +/- 30 minutes. For

8 Late Giants, UV Giant Pulls and Ventral 180° pulls, plots using both probes #3 and #4

9 are shown, as no significant difference was seen between the two probes for these

10 conditions.

11 **Figure 3-supplementary figure 1-source data legend:** Source data for all

12 individual force traces; data for each panel (A-H) broken down by sheets within the

13 Excel file.

14

15 **Figure 3-supplementary figure 2. Probe drift tests.**

16 Probe drift over time was assayed with the probe immersed in culture media or

17 water. Probe movement was translated into force equivalents, to determine how

18 much it would influence tractor pull and stress-relaxation test measurements.

19 Representative plots with probe #3 (A) showed substantially less tendency to drift

20 than with probe #4 (B, C). Drift was greatest immediately after immersion (C).

1 **Figure 3-supplementary figure 2-source data legend:** Source data for probe drift  
2 tests; data for each panel (A-C) broken down by sheets within the Excel file.

3

4 **Figure 3-supplementary figure 3. Sled friction tests.**

5 Representative force plots for sled friction on three different substrates: cover glass in  
6 a 0.1% solution of BSA, a 1% agarose pad, or 100  $\mu\text{m}$  glass beads.

7 **Figure 3-supplementary figure 3-source data legend:** Source data for sled friction  
8 tests

9

10 **Figure 3-supplementary figure 4. Response of explants in tractor pull after**  
11 **tension increase or relaxation.**

12 The anchor strip was moved 50  $\mu\text{m}$  away from the probe to increase tension on the  
13 explant by 0.5 to 0.6  $\mu\text{N}$  (A, B). Two examples (green and red in A, B) are compared to  
14 mean control values (blue in A, B).

15 The anchor strip was moved 100  $\mu\text{m}$  toward the probe to relax tension on the explant  
16 by 0.7  $\mu\text{N}$  (F,G). In all cases, the point of maximum deflection is indicated by \*. Two  
17 examples (blue and red in F, G) are compared to mean control values (green in F, G).  
18 Close-ups of the time period around the tension adjustment are shown in B, G.

19 Tension increase via anchor movement (red arrow; C), resulted in an immediate  
20 increase in the deflection of the probe (black arrow; C); as the explant underwent

1 stress-relaxation (double headed green arrow; D), tension was reduced (green arrow;  
2 D). Eventually, continued convergence (double headed blue arrow; E) added  
3 additional tension to the system (blue arrow; E).

4 Tension reduction via anchor movement (red arrow; H), resulted in an immediate  
5 decrease in the deflection of the probe (red arrow; I); rapid elastic recoil (< 5 seconds)  
6 of the explant as stored elastic energy was released resulted in convergence of the  
7 explant (double headed blue arrow; I), and increased deflection of the probe (blue  
8 arrow, I). Further morphogenic convergence of the explant occurred subsequently  
9 (as in E).

10 **Figure 3-supplementary figure 4-source data legend:** Source data for Increased tension or  
11 Relaxation during tractor pulls, panels A,B and F,G on different sheets within Excel file.

12

13 **Figure 4. Schema of movements and measures involved in stress-relaxation test.**

14 Start position, with cleat adjacent to probe. Stage is moved 300 microns (A, red arrow) against  
15 probe, to impose stress, with resulting probe deflection (A, black arrow). The explant shows an  
16 instantaneous strain (B, green arrow), then exhibits viscoelastic decay, or “relaxation” over time  
17 (C, green arrows), reducing the deflection of the probe (B, black arrow), until tension equals  
18 residual stiffness (in practice,  $E_{180}$ ). Finally, the stage is moved back 400 microns (C, red  
19 arrow), which de-stresses the explant and allows the probe to return to its starting position (C,  
20 black arrow). The explant shows elastic recovery (D, green arrows). (E) A model of the explant  
21 as a viscoelastic material, with springs representing instantaneous ( $E_{SP}$ ) and residual ( $E_{180}$ )



1 stiffness, and a dashpot representing the viscosity, with relaxation time (half-time of decay), tau  
2 ( $\tau$ ). In an example of a stress-relaxation test (F), the stage, to which the anchor strip (left) is  
3 attached, is moved (F, red line) to impose a stress, by pulling the cleat against the probe (as in A,  
4 B). This imposes a strain (F, green line) on the explant, and deflects the probe (F, black line), as  
5 in (A). The explant continues to undergo strain, as in C, until it reaches its residual stiffness. The  
6 movement of the sled (F, magenta) initially parallels that of the probe, until the stage is moved  
7 away from the probe (as in C, D) at about 300 seconds, at which point the explant shows elastic  
8 recovery of the imposed strain (as in D), pulling the sled with it.

9 In order to estimate  $E_{sp}$  and  $\tau$  we used non-linear regression curve fitting of the stress relaxation  
10 phase (B, C, green arrows; F, green line).

11 **Figure 4-source data legend:** Source data for Stress Test Example, Panel F.

12

13 **Figure 5. Stress-relaxation tests.**

14 The sagittal sectional area (SSA) for different kinds of unencumbered explants was determined  
15 at points throughout gastrulation and neurulation from confocal z-series of RDA labeled explants  
16 (A, inset; scale bar = 1 mm in intact giant, 0.5 mm for sagittal cross section (at yellow line in  
17 giant)). Standard giant (magenta squares) and Dorsal 180° sandwich explants (blue diamonds)  
18 show similar progressions of SSA; a regression on both (violet dashed regression line,  $0.085$   
19  $\text{mm}^2/\text{hour} * (\text{hours after } G_0) + 0.24 \text{ mm}^2$ ) was used to estimate stage specific SSA for both kinds  
20 of explants in stress-relaxation tests. The increase in SSA for V180° explants tended to plateau  
21 by about 8 to 10 hours, so a first order polynomial regression (green dashed line,  $-0.0042$

1  $\text{mm}^2/\text{hour}^2 * (\text{hours after G0})^2 + 0.085 \text{ mm}^2/\text{hour} * (\text{hours after G0}) + 0.25 \text{ mm}^2$ , or  $0.68 \text{ mm}^2$  at  
2 10 hours or later) was use to estimate the stage specific SSA for V180° explants in stress-  
3 relaxation tests. The SSA of animal cap explant sandwiches was a consistent  $0.16 \text{ mm}^2$ .  
4 Estimated SSA, measured force on the probe at 180 seconds, and measured proportional strain  
5 on the explant at 180 seconds were used to determine the stiffness ( $E_{180}$ ) at several times during  
6 gastrulation and neurulation (B). Standard giant sandwich explants (dark green line), as well as  
7 Dorsal 180° (light blue) and Ventral 180° (orange) sandwich explants and animal cap sandwich  
8 explants (Yellow) were tested. In order to compare the force-bearing capacity of different  
9 tissues, a bulk spring stiffness (Force at 180 s / Strain at 180 s) was plotted (C). Error bars =  
10 standard error of the mean, n's = 3 to 6, except where no error bar is shown, where n =1.

11 **Figure 5-source data legend:** Source data for Sagittal Sectional Area (A) and Structural  
12 Stiffness and Spring Stiffness (B, C), on separate panels within Excel file.

13

14 **Figure 5-supplementary figure 1. Instantaneous Structural Stiffness and**  
15 **Viscosity of standard giant sandwich explants.** Parameters for the spring and  
16 dashpot model (Figure 4E), calculated using two different methods (NLREG or Log  
17 Transform).

18 **Figure 5-supplementary figure 1-source data legend:** Source data for  
19 Instantaneous Stiffness and Viscosity measures.

20

1 **Figure 6. Model of how the convergence forces measured in the tractor pull are related to**  
2 **modules of cell behavior in explants and embryos.**

3 Early convergence forces are generated largely by the CT machine (CT symbols, B-D). The CT  
4 symbol implies ML tensile force, represented by the inward pointing arrows, and radial  
5 compressive force, represented by the dot and indicating force directed in and out along the  
6 radial axis of the embryo (see 3D representation of CT). As CE begins, MIB (fusiform, black cells)  
7 progressively replaces the CT machine from presumptive anterior to posterior (CE symbol:  
8 green convergence, blue extension arrows, C, D) while CT continues in more posterior tissues  
9 (CT symbol, C, D). At or shortly after the onset of mesodermal MIB, MIB and CE begin in the  
10 posterior neural tissue (blue tissue, CE symbols, C, D).

11 Thus the IMZ tissues express a changing combination of CT and CE as development progresses.  
12 We represent CT and CE as modules, expressing distinctive spring constants (grey or black coils)  
13 and motor strengths (red and grey or black symbols), with the lighter spring and motor  
14 indicating CT and the darker CE (B'-D'). Force plots in (E) are means from Figure 3: blue = Early  
15 Giants; pink = Dorsal 180s; green = Standard Giants, Probe #4; purple = Late Giants; black =  
16 ventralized giants). Initially, up to about G+2hr, the entire IMZ is comprised of CT-modules (B'),  
17 which represents the situation and generates the forces seen in the first two hours of early pulls  
18 (follow grey arrow from B' to E, blue line). These forces likely approximate force generated in  
19 the preinvolution (uninvoluted) IMZ of the whole embryo (follow the gray arrow to F, CT  
20 symbols). As MIB begins, a CE module lies centrally, flanked by CT-modules in series (C') with  
21 lateral edges attached to the strips (C), which represents the situation and generates the forces  
22 measured from G+2 to 10.5h, including the period during the plateau in standard pulls (follow

1 black/gray dashed arrows to E, green line), but with an increasing contribution from CE vs. CT  
2 modules after G+2h. As more cells express MIB, the number pulling in parallel increases,  
3 increasing the spring constant and motor strength of the CE module.

4 Because the VAZ forms as an arc it does not initially pull directly on the attachment strips (C;  
5 green arrows at edge) but on the intervening CT modules. The nascent CE module is initially  
6 small and weaker than the adjacent CT modules, but becomes larger over time, resulting in both  
7 increasing spring constant and motor strength. This eventually overpowers the shrinking CT  
8 modules, such that their convergence is reduced (C', more open coils), which dissipates some of  
9 the tension generated by the CE module, and thereby contributing to the plateau. In contrast, in  
10 the embryo, the CE (MIB) module is, from the beginning, always anchored to the endoderm at  
11 both ends, with only an indirect connection to CT modules in the lateral and ventral portion of  
12 the MZ (not shown in F; see H, G, asterisks). Thus CT acts as a continuous but diminishing ring of  
13 converging tissue outside the blastopore, while CE-expressing tissue inside the blastopore,  
14 primarily in series with the relatively inert endodermal tissue, acts in parallel with this ring.

15 The transient decline rather than plateau in the rate of force increase during late pulls (E, purple  
16 line) can be explained by a larger domain comprised of CE modules and smaller domains  
17 comprised of CT modules, compared to standard control pulls at the onset of the plateau, such  
18 that not all force generated by the CE domain was absorbed by reduced convergence in the CT  
19 domain. Once MIB progresses laterally to points of attachment with the strips (D, D'), the decline  
20 ends; this represents the situation during the second phase of force increase (follow black arrow  
21 to E, magenta line and to H, G). At this point, all the force generated by CE and MIB in posterior  
22 tissues are transmitted to the attachment strips, while, with the progression of MIB posteriorly,

1 force from more anterior tissues is transmitted progressively more indirectly, at an angle (green  
2 arrows; D). Dorsal pulls show no plateau, because they contain little or no tissue comprised of  
3 CT modules (D') by the onset of the plateau (follow solid black arrow to E, pink line).  
4 Ventralized giant pulls show maximal force generation at the level of the plateau, being  
5 comprised of only CT modules (B'; follow the gray line to E, black line).

6

7 **RICH MEDIA FILES:**

8

9 **Movie 1.** Movie comparing gastrulation and BP closure in normal (left) and  
10 ventralized (right) embryos. Timestamp shows minutes elapsed. The movie begins  
11 during cleavage stages and runs through neurulation. Gastrulation begins at control  
12 stage 10 (G0) at 285 min, stage 10.5 (G+2h) at 405 min.

13

14 **Movie 2.** Movie showing standard giant in tractor pull apparatus. Probe, sled and  
15 anchor are indicated in the first frame. Timestamp shows hh:mm:ss. Movie begins  
16 shortly after st. 10.5 (G+2h)

17

18 **Movie 3.** Movie showing ventralized giant sandwich explant. Timestamp shows  
19 hh:mm:ss

20

1 **Movie 4.** Movie showing unencumbered giant sandwich explant. Timestamp shows  
2 hh:mm:ss. Stage 10.5 (G+2h) at about 13:34:57.

3

4

## 1 **APPENDIX 1 - DRIFT & FRICTION:**

2 Probes were placed in distilled water and imaged every 3 minutes. Force equivalents  
3 for the observed drift were calculated, for purposes of comparing different probes and the  
4 effect of drift on force measurements. Probe #3 showed minimal drift, within +/- 0.5 $\mu$ N  
5 over 6 hours (Figure 3-supplementary figure 2A). In most cases the most rapid drift  
6 occurred within the first 60 minutes. Probe #4 shows much greater drift (Figure 3-  
7 supplementary figure 2B), especially when recorded from shortly after the dry probe was  
8 immersed (Figure 3-supplementary figure 2C). However, in nearly all cases, within 30  
9 minutes of immersion probe #4 showed drift that was near linear over the range of forces  
10 we consider. When probe #4 was allowed to soak overnight, it had reduced probe drift  
11 (turquoise line that reaches 0.5 $\mu$ N, Figure 3-supplementary figure 2B). Drift for probe #4  
12 may have to do with hydration and/or temperature equilibration of some element of the  
13 probe-holder assembly. By soaking the probes for 60 minutes prior to use and correcting  
14 for any remaining drift (as measured at the end of the tractor pull, upon the release of the  
15 explant from the probe) by interpolating over the period of force measurement, we  
16 minimized the error contributed by drift.

17

18 To evaluate the friction between the sled and the under-laying substrate, we moved the  
19 stage holding the tractor pull chamber such that the cleat on an unattached sled was  
20 pushed against a stationary probe, recorded the probe position every 100-200 seconds and  
21 calculated the force exerted on the probe at each time for 2-6 hours. We compared the  
22 friction of the sled with the substrate, 1) on bare glass, 2) with an agarose pad of roughly

1 50-100% larger area under the sled and 3) with a sparse layer of 100 $\mu$ m glass beads under  
2 the sled. Tests were done in DFA, which contains 0.1% BSA. A representative example of  
3 test runs on different substrates is shown (Figure 3-supplementary figure 3). Treatment of  
4 the glass beforehand (e.g. by acid-ethanol wash and/or coating with BSA) appeared to have  
5 minimal effect. For glass, agarose and beads ( $n$ 's = 4, 5 and 7), the average median forces  
6 were 0.41, 0.48 and 0.25  $\mu$ N respectively. The average minimum forces were 0.27, 0.36 and  
7 0.00  $\mu$ N. The average standard deviation was 0.10, 0.07 and 0.14  $\mu$ N. The force on the  
8 probe was below 0.32, 0.40, and 0.09  $\mu$ N 10% of the time. And the fraction of the time  
9 forces were below 0.25  $\mu$ N was 12, 23 and 64%. Although the 1.5 to 2-fold differences in  
10 the median friction force was only a moderate improvement, the difference in the time the  
11 friction force was at or near 0  $\mu$ N on beads was dramatic. Rather than experiencing a fairly  
12 steady approximately 0.4 to 0.5  $\mu$ N of friction in the case of glass or agarose, sleds over  
13 beads experienced lower friction much more frequently. For this reason, we used a sparse  
14 layer of beads in all force measurement and stress-relaxation tests. We assume that force  
15 measurements are approximately 0.2  $\mu$ N below the force explants could produce at a given  
16 time.

17

## 18 **APPENDIX 2 - IMMUNOHISTOCHEMISTRY & VENTRALIZED EMBRYOS.**

19 For immunohistochemistry, embryos and explants were fixed at stage 26-28 in MEMFA  
20 (Kay and Peng 1991) overnight at 4°C and transferred to methanol for storage at -20°C.  
21 Fluorescent staining for notochord with Tor70 (temporary Antibody ID is AB\_2715462,  
22 Kushner 1984) and for somitic mesoderm with 12/101 (RRID:AB\_531892, Kintner and



1 Brockes 1984) was done as previously described (Bolce et al. 1992). Notochord and  
2 somites in giants from tractor pulls were generally elongated orthogonal to the  
3 mediolateral axis, although to a lesser extent than in an unencumbered giant. In standard  
4 giant or D180° sandwich explants from tractor pulls, the posterior ends of the two  
5 notochords frequently did not fuse, and in some cases most of the notochords were  
6 separate, but co-linear (Figure 2-supplementary figure 4 A-H). The two files of somites do  
7 fuse (Figure 2-supplementary figure 4 A-H). In tractor pull explants where an additional  
8 strain was imposed, both posterior notochord and somites often did not fuse, and  
9 sometimes elongate non-orthogonally to the axis of pull (Figure 2-supplementary figure 4  
10 I-L); in a few cases, the two sets of notochords and somites remained largely independent,  
11 which tended to be coupled with generally aberrant morphogenesis.

12 UV ventralization for 5 to 7 minutes gave an average DAI of 1.8 (n = 318). Embryos of  
13 DAI score 0 to 3 generally manifested little or no evidence of CE prior to the end of  
14 neurulation, indicating that we had effectively eliminated CE in our embryos during the  
15 period of force measurement. Ventralized sandwich explants in some cases contain small  
16 amounts of somitic tissue, but rarely show any notochordal tissue (Figure 2-supplementary  
17 figure 4 M-P). Among unselected embryos, some notochord appeared infrequently (4%, n  
18 = 56) while some somite appeared more frequently (40%, n = 54). When ventralized giant  
19 sandwich explants did have some dorsal tissue, it generally didn't manifest (show any sign  
20 of CE) until after the plateau had been reached, and generally detracted rather than added  
21 to the force.

22

## 1 **APPENDIX 3 - MORPHOMETRICS.**

2 The sagittal sectional area of unconstrained giants sandwiches was determined from  
3 RDA-labeled explants (50 ng/embryo), cultured to control stages 10.5 to 19, fixed in  
4 MEMFA and imaged in the laser scanning confocal. Minimal changes in explant dimensions  
5 were seen after fixation (< 5%, n = 6). The Z-step distance of the confocal was calibrated  
6 using a coverslip fragment of known thickness immersed in a solution of RDA. En face  
7 confocal images for the entire explant were obtained, re-sliced to show the mid-sagittal  
8 sectional plane, and the area of these plotted against stage. A regression was plotted on the  
9 sagittal sectional area (SSA) of several explants, and this was used to estimate the sagittal  
10 sectional area of the explants used in the stress-relaxation test. To estimate the effective  
11 SSA, explants were sliced parasagittally and parasagittal confocal images were collected,  
12 from which the area of the deep mesoderm was estimated, constrained by cell size and  
13 distance from the bottle cells.

14 Proportional convergence or strain in sandwich explants along the entire mediolateral  
15 axis of the IMZ or for defined sub regions was measured with respect to the distance  
16 between specific cells or distinctively pigmented regions along the widest part of the IMZ  
17 (generally, near the limit of involution) at the onset of time-lapse recording ( $L(i)$ ), and  
18 thereafter ( $L(t)$ ). Time specific strain was calculated as:

19 
$$S(t) = (L(t)-L(i))/L(i)$$

1 Rates were then  $S(t)/\Delta t$ . Convergence is expressed as strain \* -1. Rates of convergence  
2 during giant construction were instead with respect to the initial circumference in the  
3 intact embryo.

4 Shear rate of explant with respect to attachment strips for a given time period was  
5 calculated as:

$$6 \text{ Shear rate} = (\Delta W - \Delta D)/W(i)/\Delta t * 100\%$$

7 where  $W(i)$  is the initial width of the widest part of the mesendoderm at the onset of the  
8 assay,  $\Delta W$  is the change in width during the time period,  $\Delta D$  is the displacement of the sled  
9 strip toward the anchor strip during the time period and  $\Delta t$  is the elapsed time.

10

#### 11 **APPENDIX 4 – ESTIMATION OF PARAMETERS**

12 Two alternative methods were used to determine parameters for the spring and  
13 dashpot model

$$14 \text{ SS}(t) = SS_{INF} + SS_{SP} * e^{(-t/\tau)} \quad (2, \text{ from main text})$$

15 based on the observed time ( $t$ , in seconds) dependent structural stiffness ( $SS$ ), calculated  
16 as:

$$17 \text{ SS}(t) = F(t) / (SSA * S(t)) \quad (3)$$

1 where time specific force ( $F(t)$ ) was as calculated in eq. 1 (main text), SSA was the  
2 estimated stage specific sagittal sectional area (see Appendix 3), and  $S(t)$  the time specific  
3 strain (see Appendix 3) was measured from the mediolateral extent of the mesodermal  
4 component of the explant spanning the gap between the strips to which they were  
5 attached.

6 In the first method (“log transform”),  $SS_{INF}$  is assumed to be  $0.97 * SS_{(180)}$  because  
7 stress decay has stabilized by 180 seconds, and active convergence is likely to overwhelm  
8 further relaxation. Given eq. 2, a linear regression on

$$9 \quad y(t) = \ln(SS(t) - SS_{INF})$$

10 then yields the line

$$11 \quad y(t) = (-1/\tau) * t + \ln(SS_{SP})$$

$$12 \quad \text{and } SS_{INF} / SS_{(180)} = \sim 0.97$$

13 (see Appendix 4-figure 1A)

14 In the second method, a curve-fitting program (NLREG, RRID:SCR\_015722, available at  
15 <http://www.nlreg.com>, Sherrod 1995) was used to generate the parameters  $SS_{INF}$ ,  $SS_{SP}$   
16 and  $\tau$ . NLREG tended to generate a higher  $SS_{SP}$  and a correspondingly more rapid time  
17 relaxation constant (Appendix 4-figure 1).

18 In both cases, viscosity ( $\eta$ ) is determined as:

1         $\eta = \text{SSSP} * \tau$

2        Viscosity and instantaneous stiffness derived using the log transform method both  
3 show a significant increase between late gastrulation and mid-neurulation (Figure 5-  
4 supplementary figure 1 A,B, green), whereas using NLREG, they show no significant  
5 difference (Figure 5-supplementary figure 1 A,B, orange). These viscosity estimates are  
6 roughly an order of magnitude lower than those measured by David et al. (David et al.  
7 2014) on deep tissue alone. The major difference in the current study is that explants are  
8 deep tissue enclosed in superficial epithelium, which should lower the tissue surface  
9 tension.

10        The log transform method tends to match the later part of the stress-relaxation curve,  
11 giving a lower instantaneous stiffness and higher viscosity, whereas the reverse is true of  
12 the NLREG method (Appendix 4-figure 1B). The two methods highlight the fact that  
13 viscosity appears to be much lower during the first 10-15 seconds of stress relaxations  
14 than thereafter. This may reflect a change in the cellular elements that are viscously  
15 flowing over time, with very low viscosity elements flowing first, followed by successively  
16 higher viscosity elements. Because tissues in the embryo are already tension bearing, the  
17 viscosity derived from log regression more accurately reflects the relevant mechanical  
18 properties over developmental time scales.

19        An explant “spring stiffness” constant ( $K_E$ ) was also calculated:

20         $K_E = F(180) / (L(180) - L(0))$

1 with  $F(t)$  and  $L(t)$  as described above.

2

### 3 **Appendix 4-Figure Legend**

#### 4 **Appendix 4-figure 1. Comparison of methods for estimating parameters.**

5 (A) Example of estimation of parameters from linear regression on log transform of time-  
6 dependent stiffness data. Blue: plot of  $\ln(\text{measured } SS(t) - \text{measured } SS(180) * 0.97)$ .  
7 Black: linear regression plot on log transformed data. green: plot of  $\ln(SS_{sp} * e^{(-t/\tau)} -$   
8  $E180)$ , with parameters as estimated by NLREG.

9 (B) Comparison of Model vs. Measured Stiffness for the case in A, above. Blue: measured  
10 time dependent structural stiffness ( $SS(t)$ ). Magenta: plot of  $E(180) + SS(sp) * e^{(-t/\tau)}$ , with  
11 the later two parameters based on linear regression on log transform, as in A, above.  
12 Green: plot with all parameters from NLREG.

13 **Appendix 4-figure 1-source data legend:** Source Data for Parameter Estimation Method  
14 Examples.

15

### 16 **APPENDIX 5 - CAVEATS**

17 Our stiffness measurements represent an approximation of composite structural  
18 stiffness, rather than the true stiffness of a uniform material. Giant sandwich explants are  
19 composed of presumptive endodermal and mesodermal tissues vegetally and ectodermal  
20 tissues animally, of different presumptive mesodermal (notochord, somite, etc.),

1 ectodermal (epidermal, neural) and endodermal (vegetal, suprablastoporal) along both  
2 mediolateral and animal-vegetal axes, and different basic tissue types (epithelial,  
3 mesenchymal) along their radial dimension (perpendicular to the plane of the explant) so  
4 are not homogeneous in any dimension. Additionally, especially after CE begins at stage  
5 10.5 (G+2h), the shape of the sagittal sectional area (SSA) begins to vary along the  
6 mediolateral extent of giant sandwich explants (Figure 2-supplementary figure 3; Movie 2).  
7 As a consequence of these inhomogeneities, stiffness measures are biased toward the least  
8 stiff regions along the mediolateral axis.

9 In D180 and V180 explants at later stages, the mesodermal tissue rounded up to some  
10 extent, with a relatively circular cross section across the AP axis, with the attachment strips  
11 inserted part way into the circle. Stretch resulted in both over-all strain of the mesodermal  
12 tissue, but also flattening of the circular cross section. Probably as a consequence, later  
13 stiffness measurements from D180° explants in particular are more variable (Figure 5C).  
14 We found that straining these rounded tissues 600 rather than 300 microns gave more  
15 consistent results for stiffness measurements, and so those results are reported.

## 16 **APPENDIX 6 – SUPPLEMENTARY DISCUSSION**

17 The nature of convergence by MIB may offer an alternative or complementary explanation  
18 as to why an increase in compressive load results in increased force whereas an increase in  
19 tensile load does not. The cell intercalation process is self-reinforcing in that it increases  
20 the number of units in the parallel, pulling array, but depends on the generation of  
21 additional tension in order for cells to pull themselves in between one-another. Thus some  
22 threshold of unresolved tensile load may retard further convergence via intercalation and

1 thus limit additional force production, whereas an increased compressive load driving  
2 extension, the output of convergence, may activate compression-sensitive accommodation  
3 mechanisms while not immediately limiting the progress of intercalation. The differences  
4 in responses to compressive and tensile loads should be evaluated further.



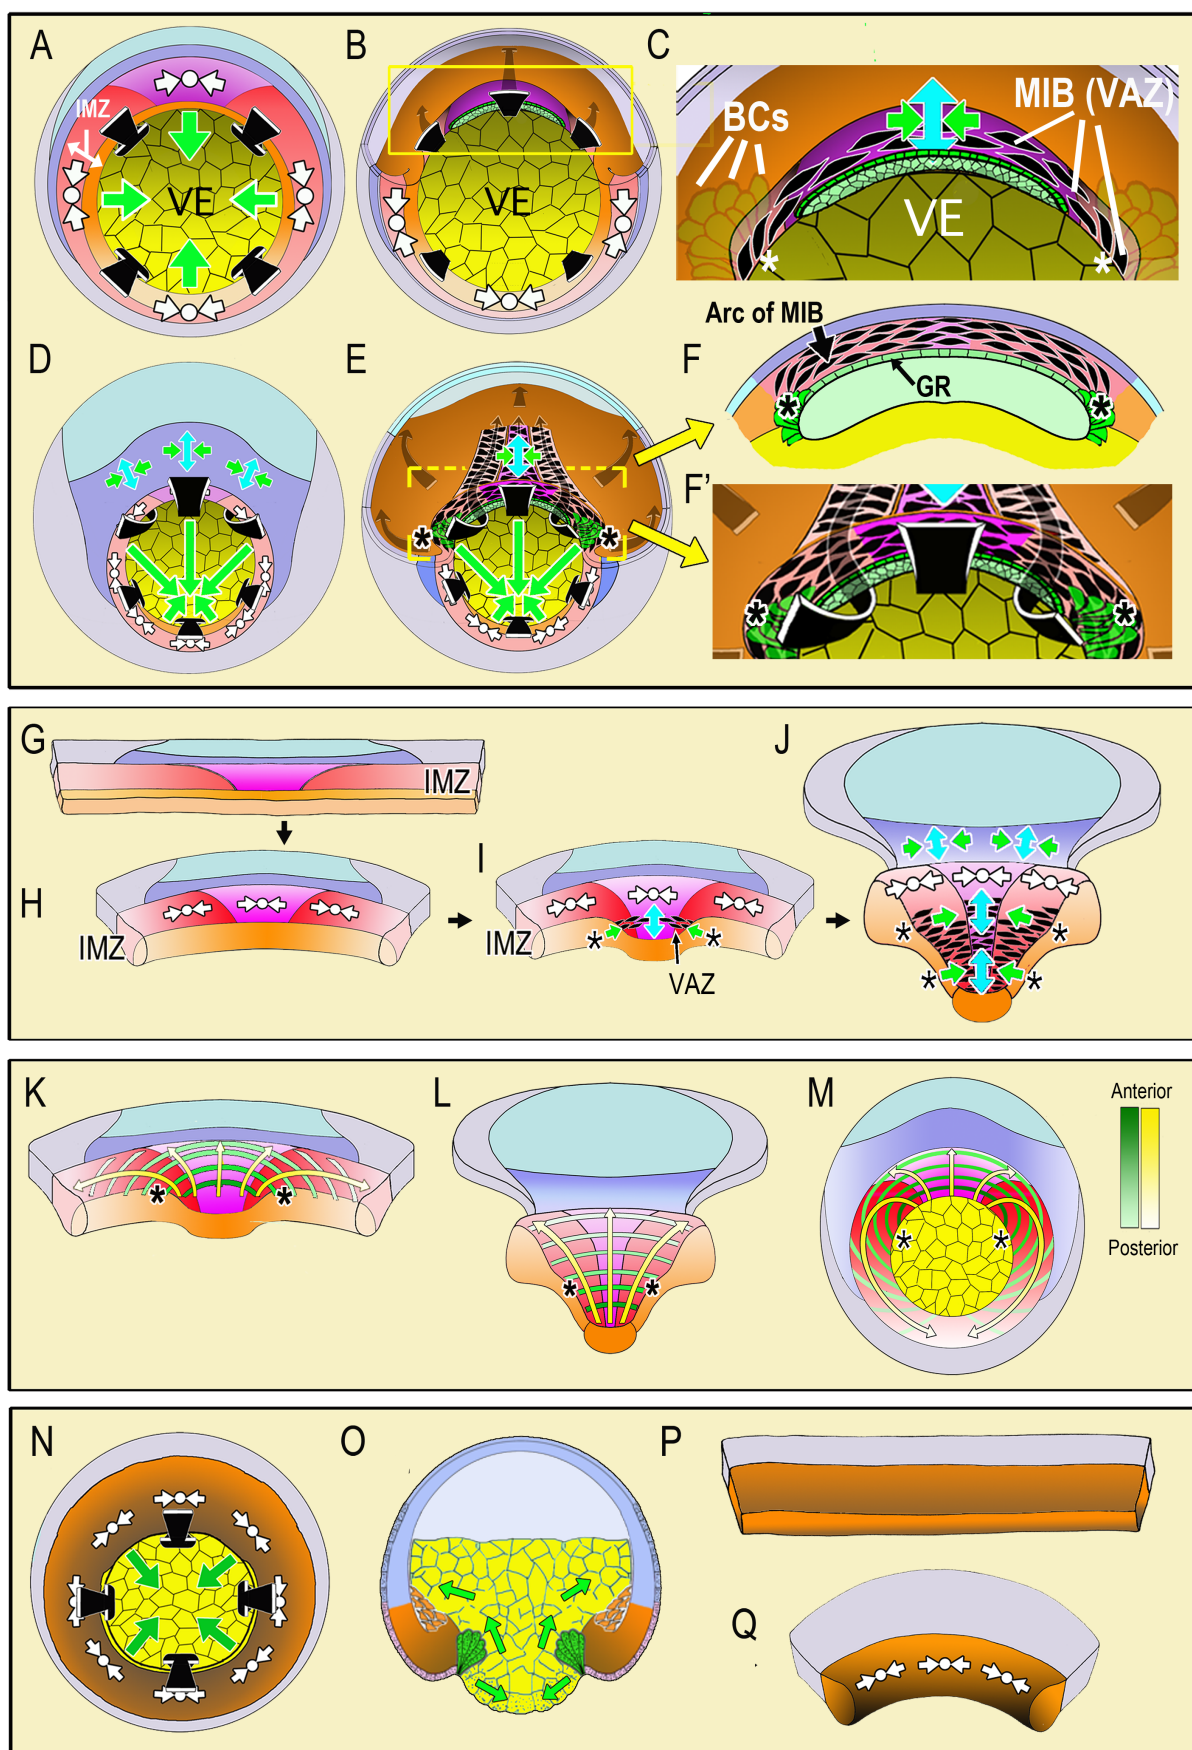

Fig. 1 Shook et al., 2017

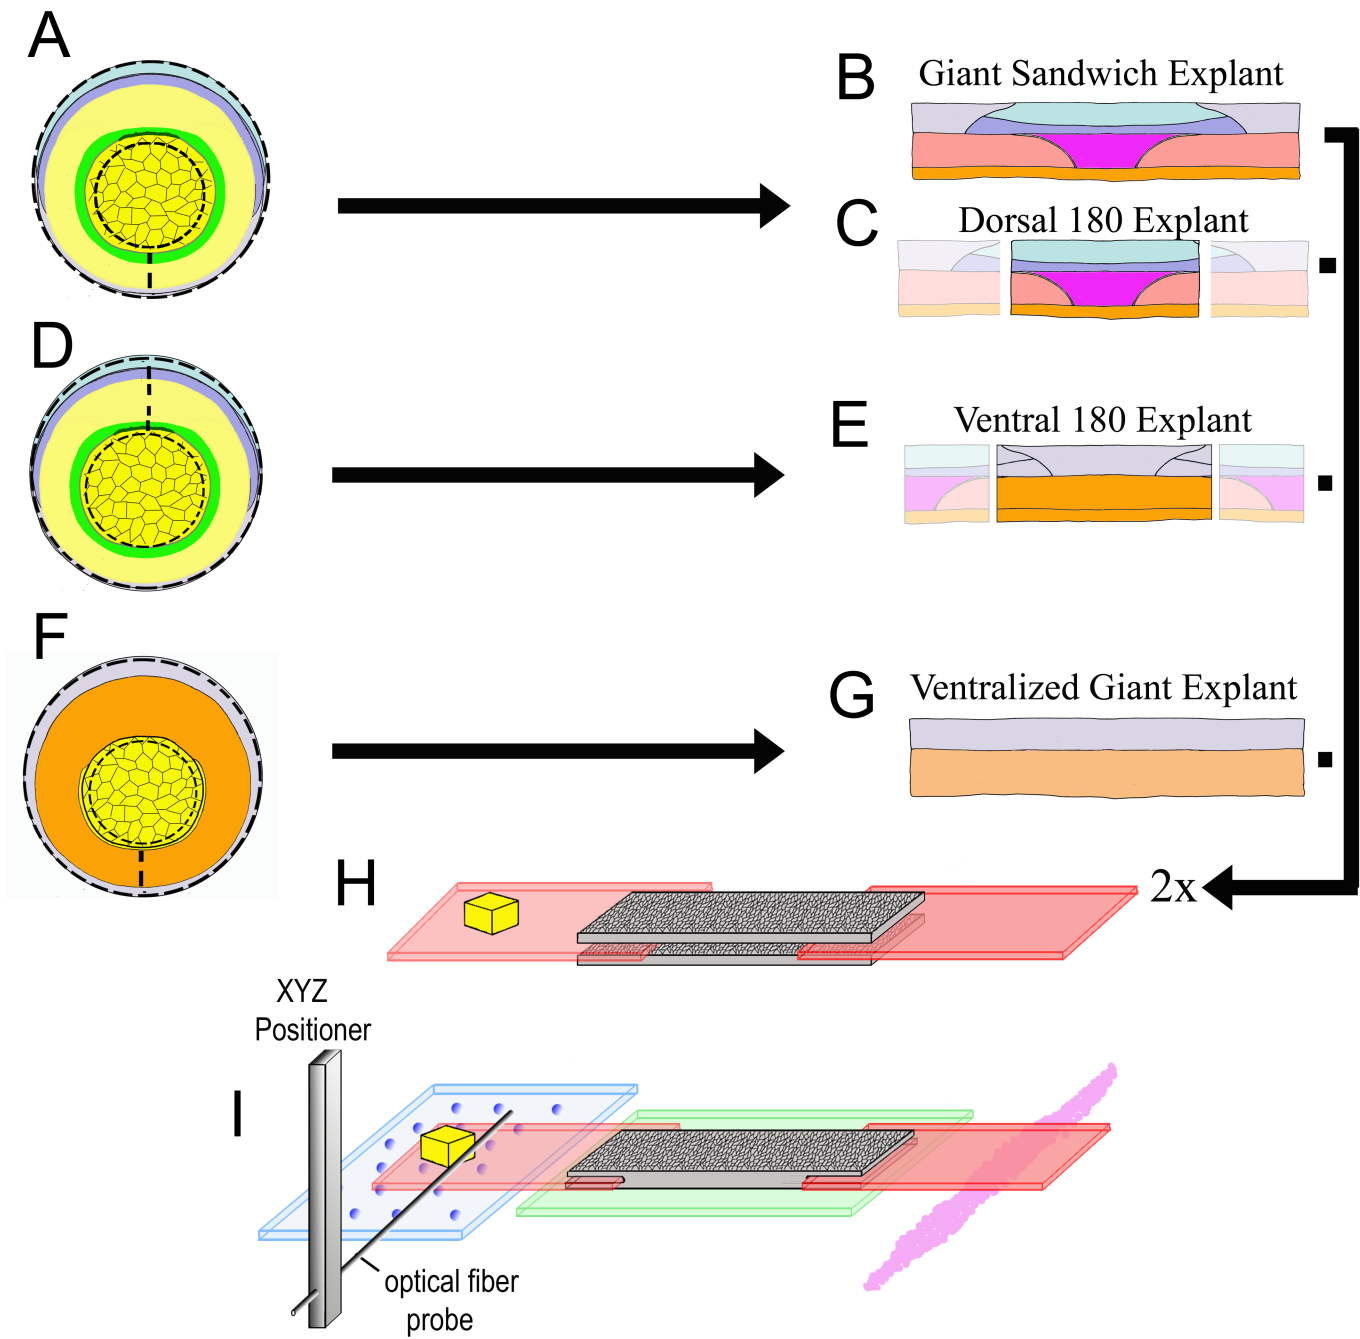

Figure 2

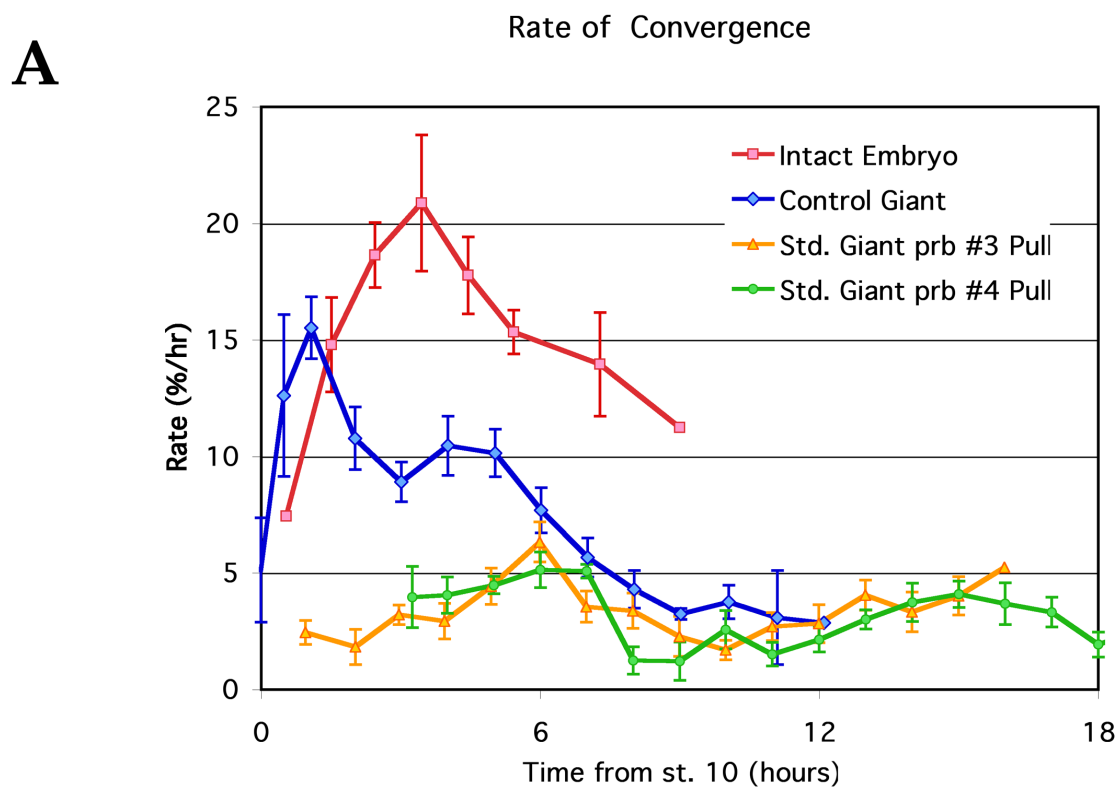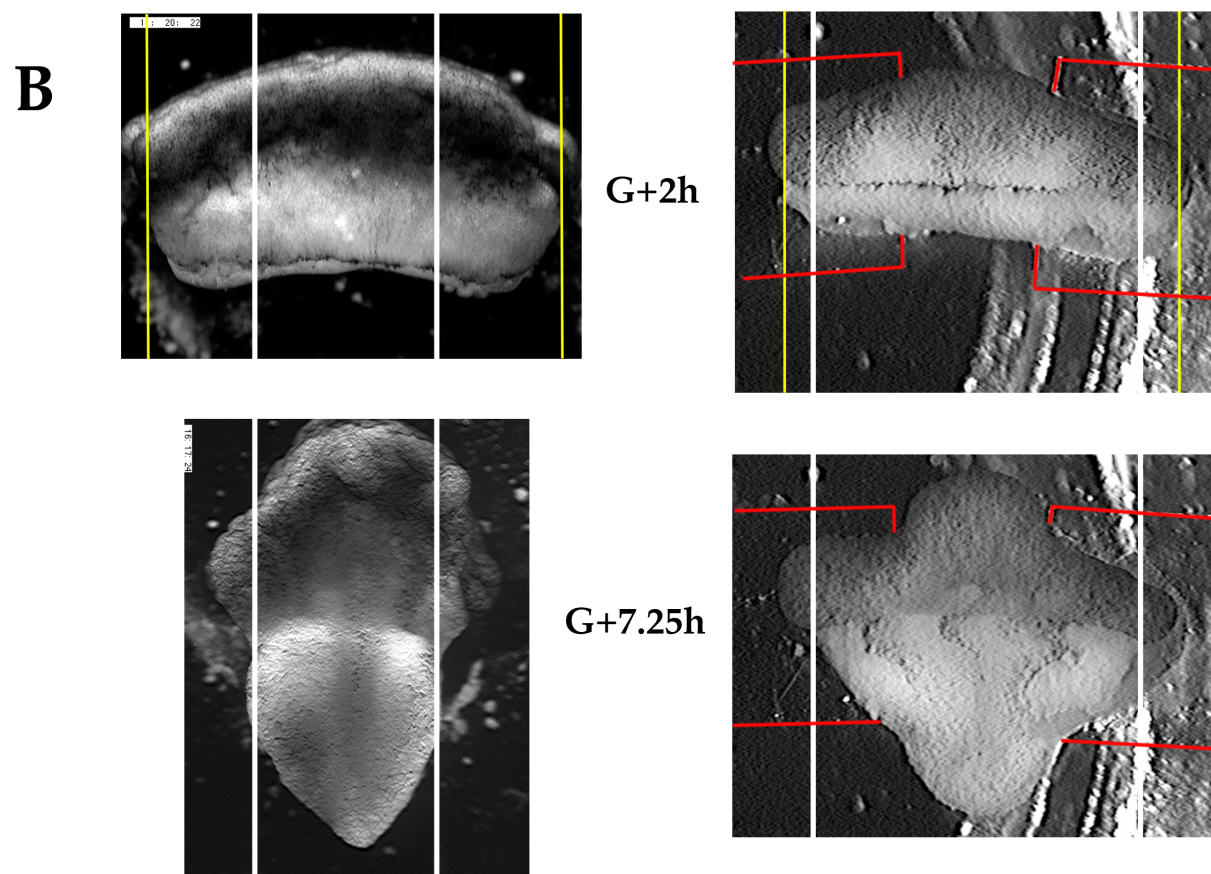

Figure 2-supplementary figure 1



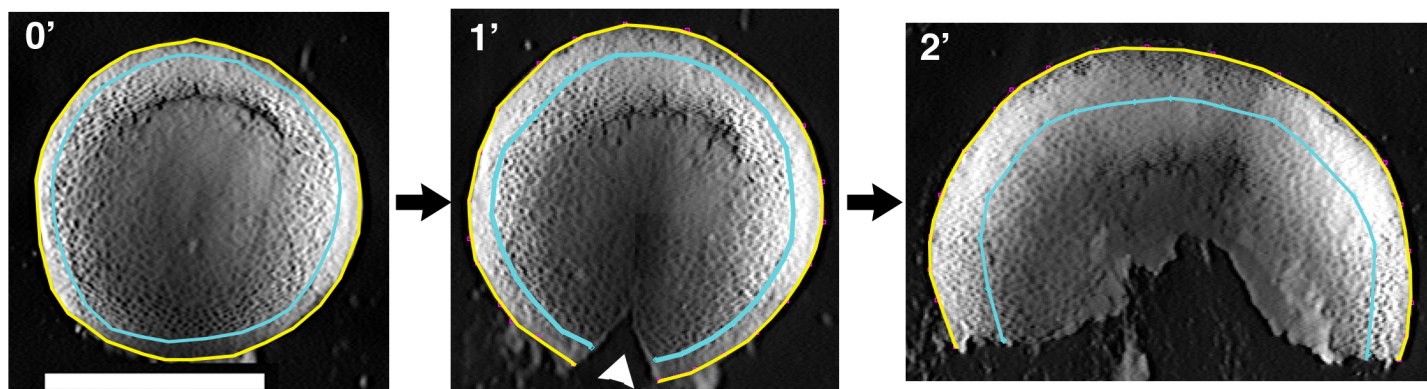

**A**

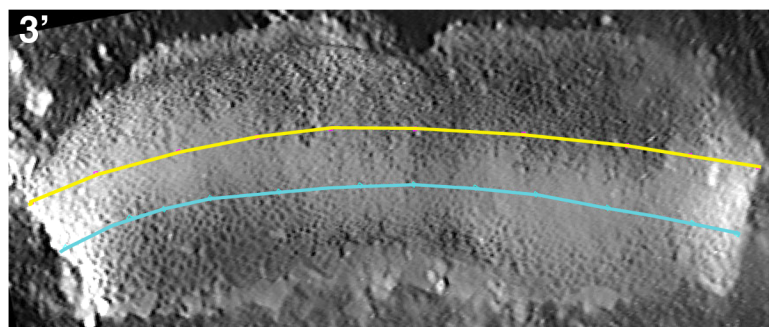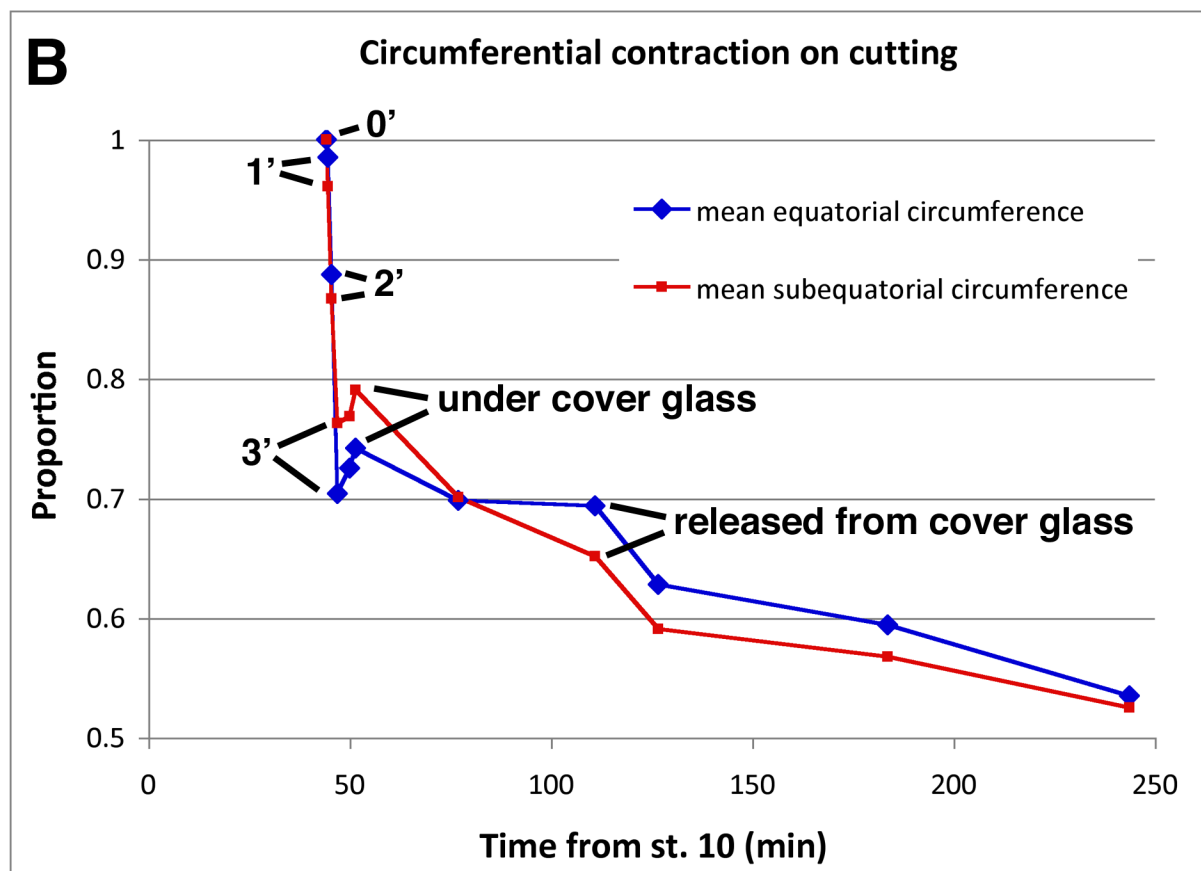

Figure 2-supplementary figure 2

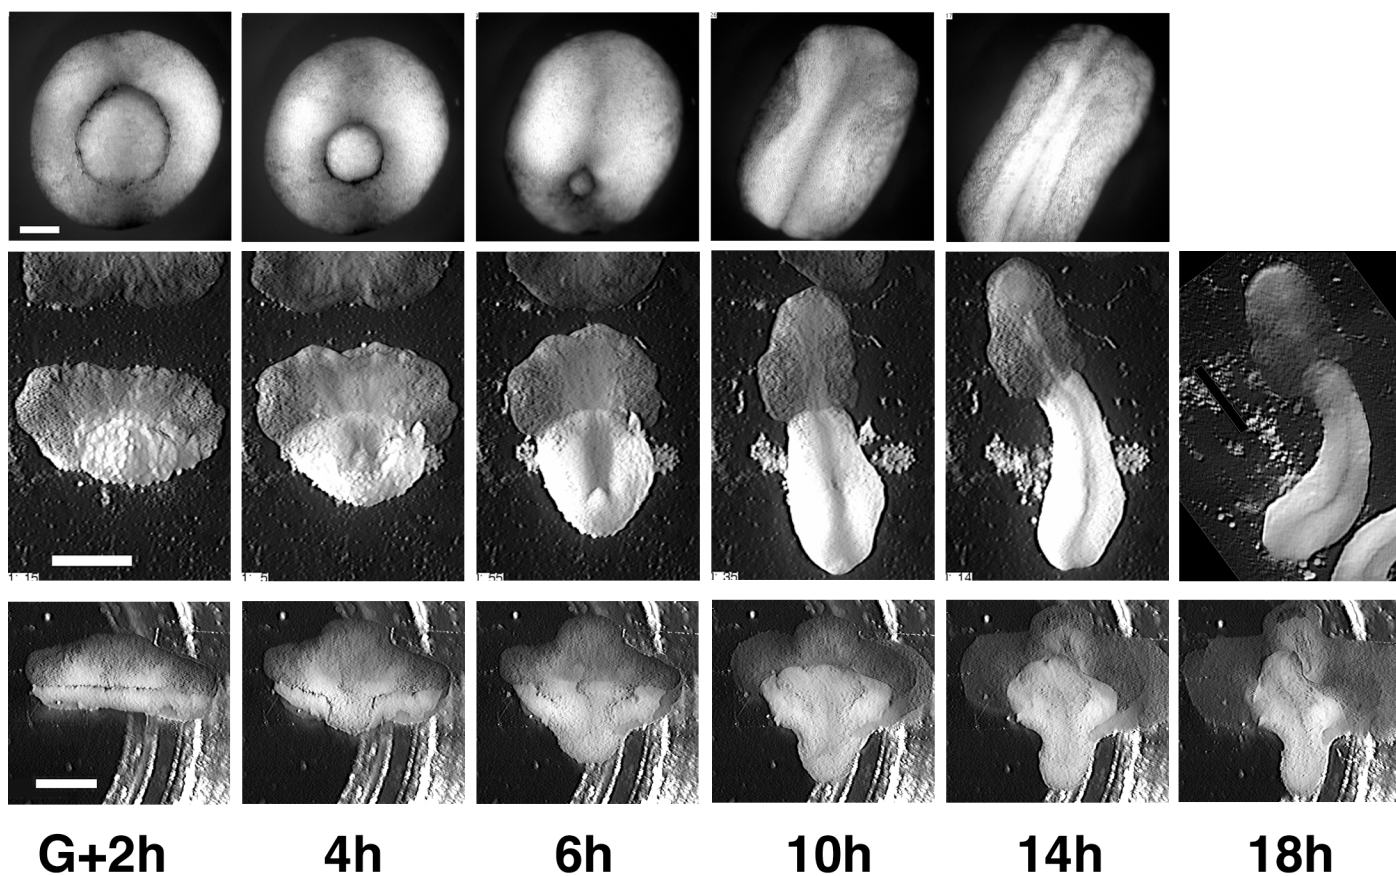

Figure 2-supplementary figure 3



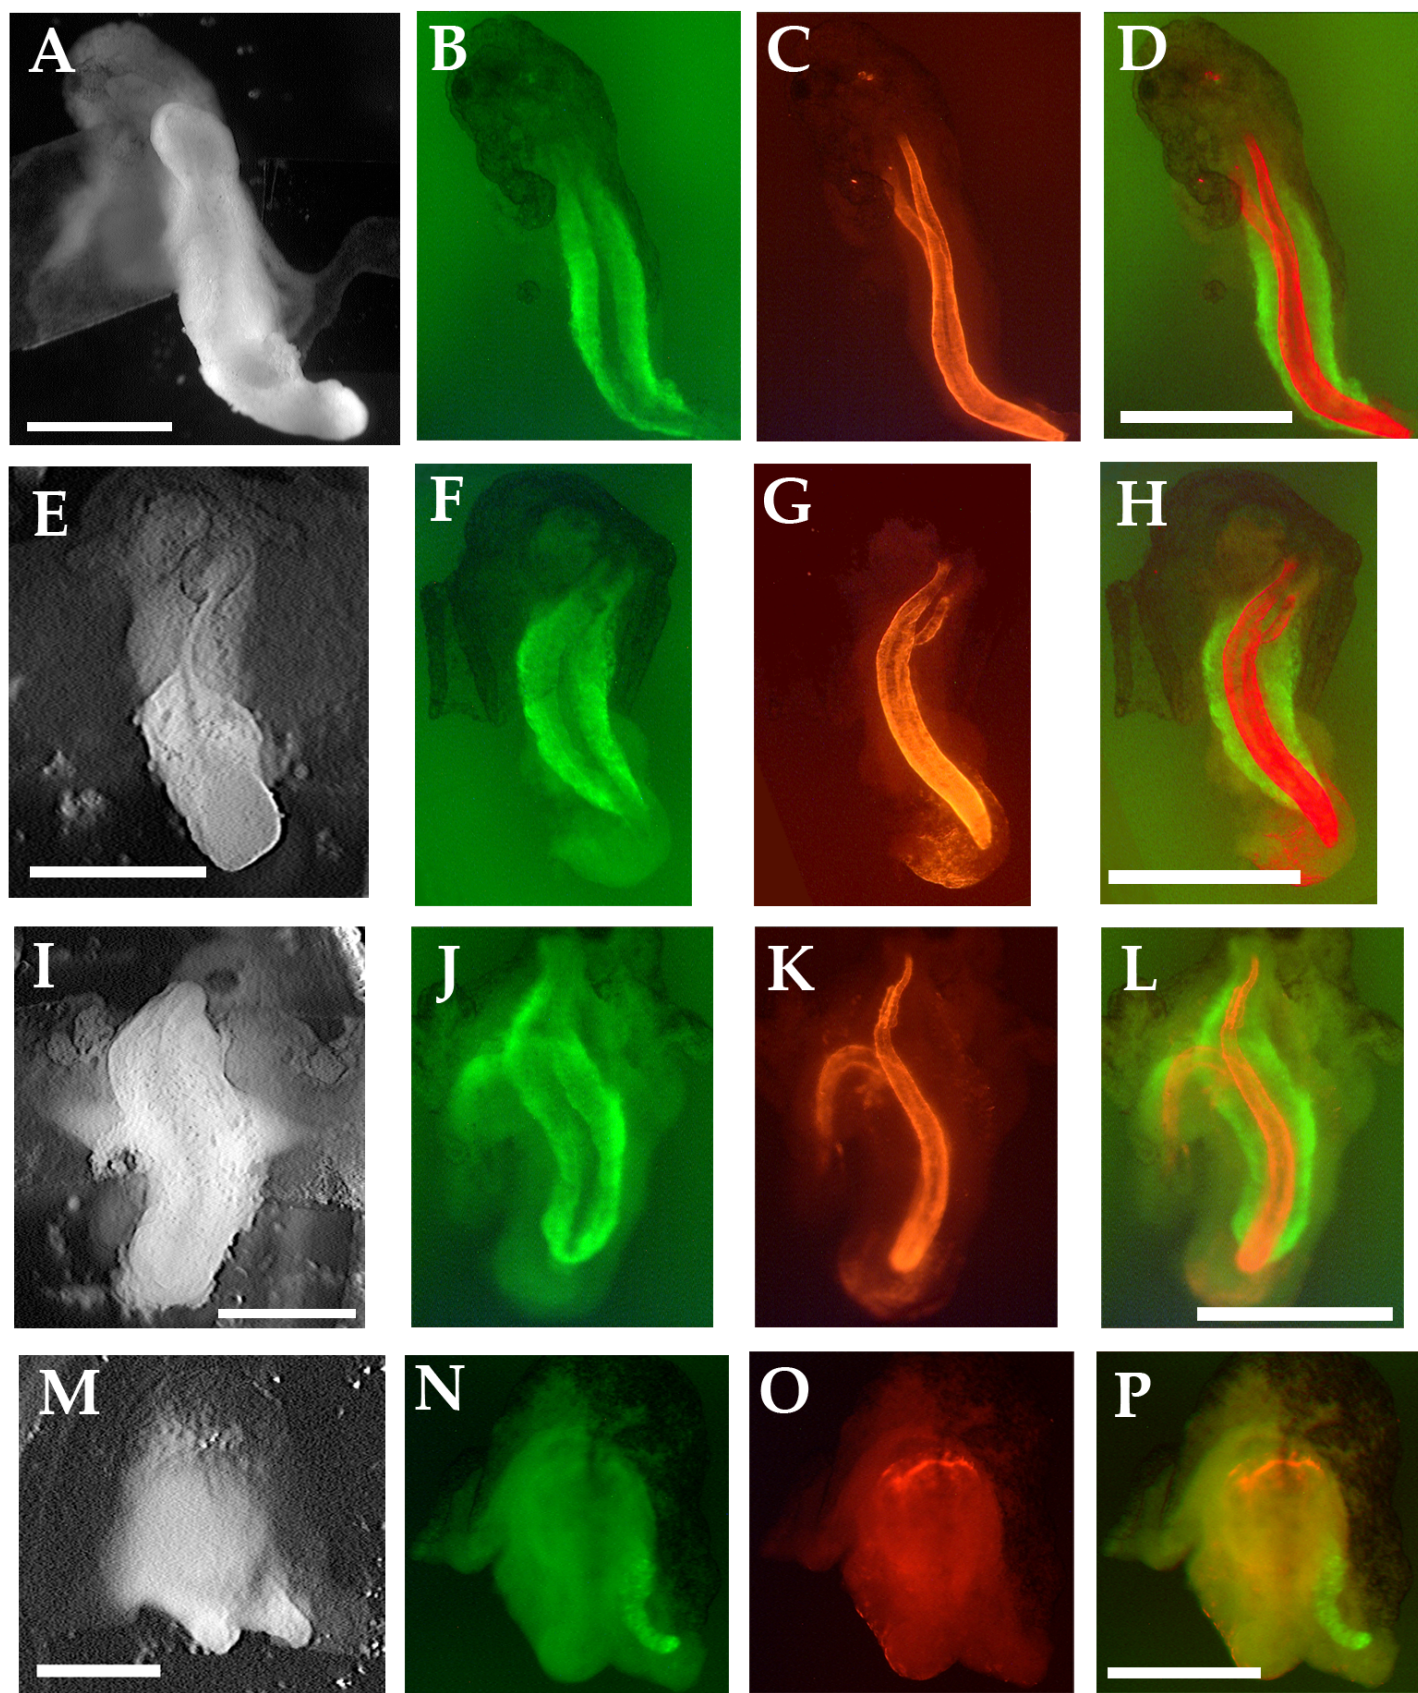

Figure 2-supplementary figure 4



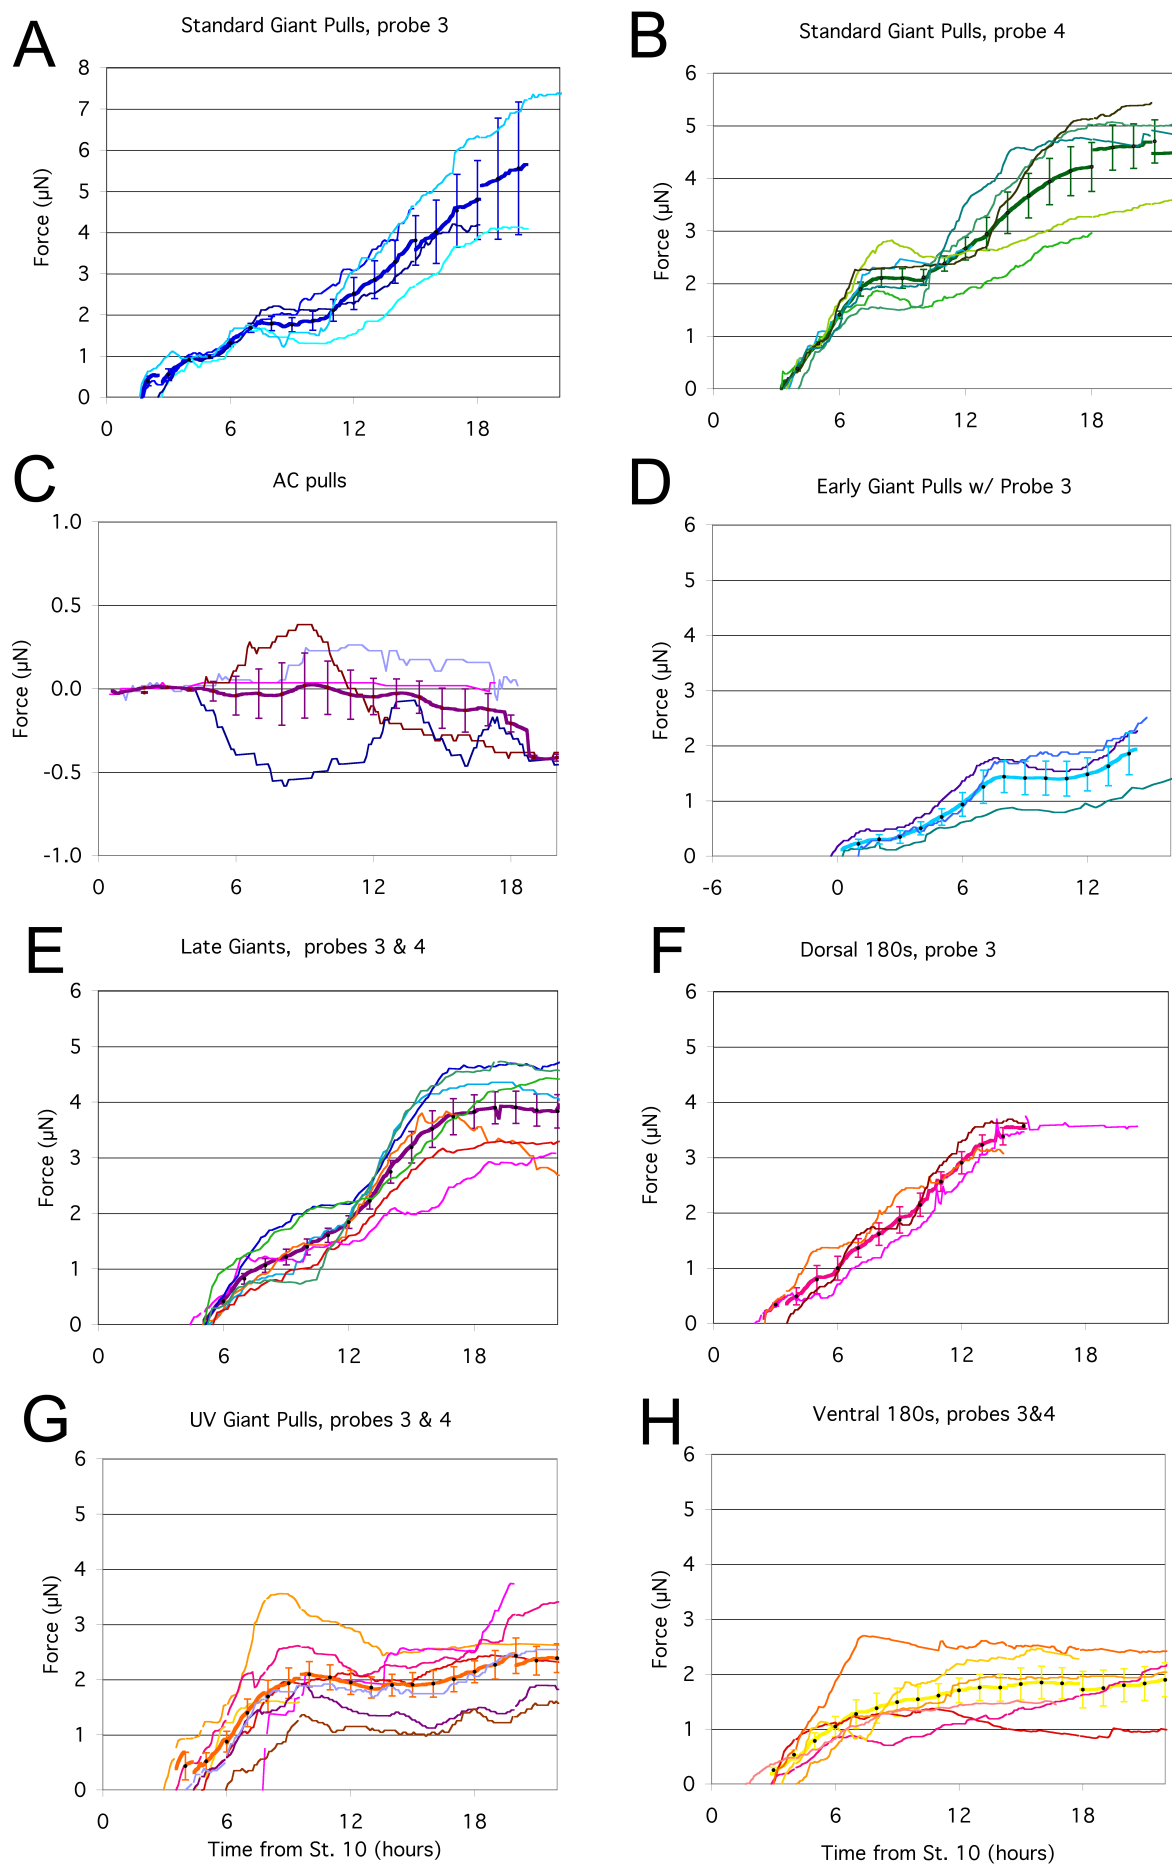

Figure 3-supplementary figure 1



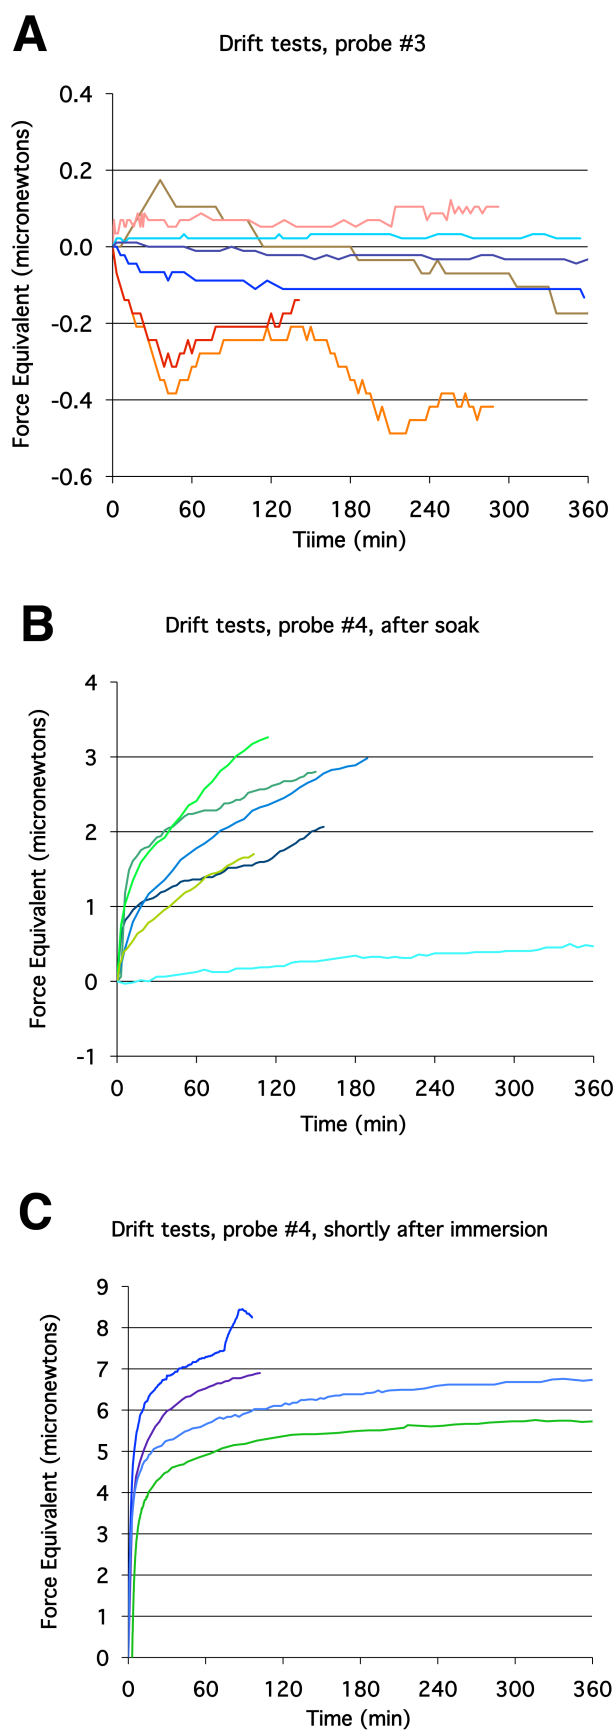

Figure 3-supplementary figure 2

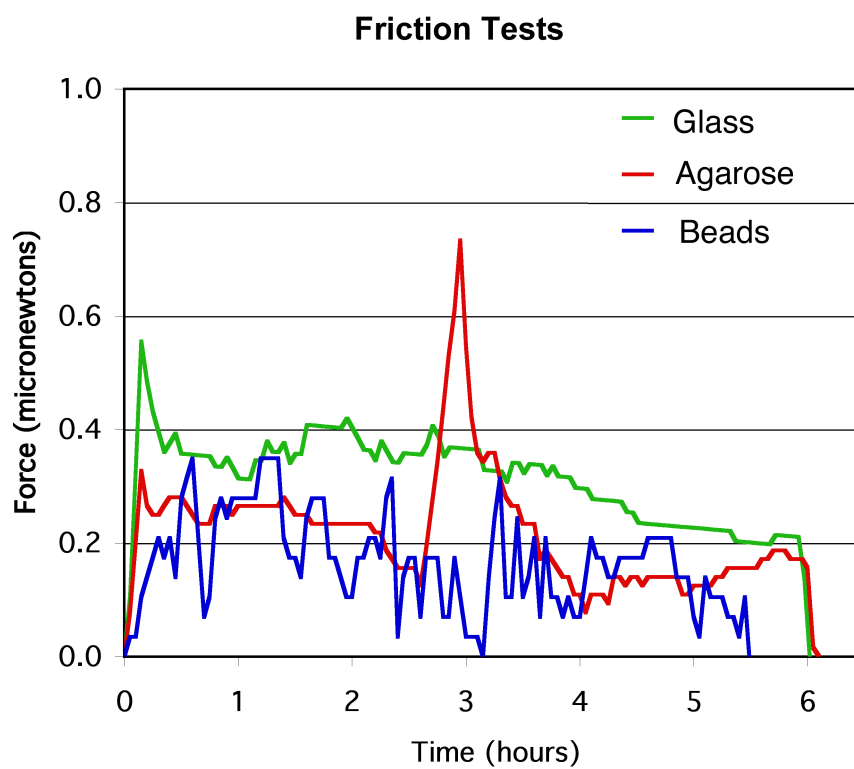

**Figure 3-supplementary figure 3**

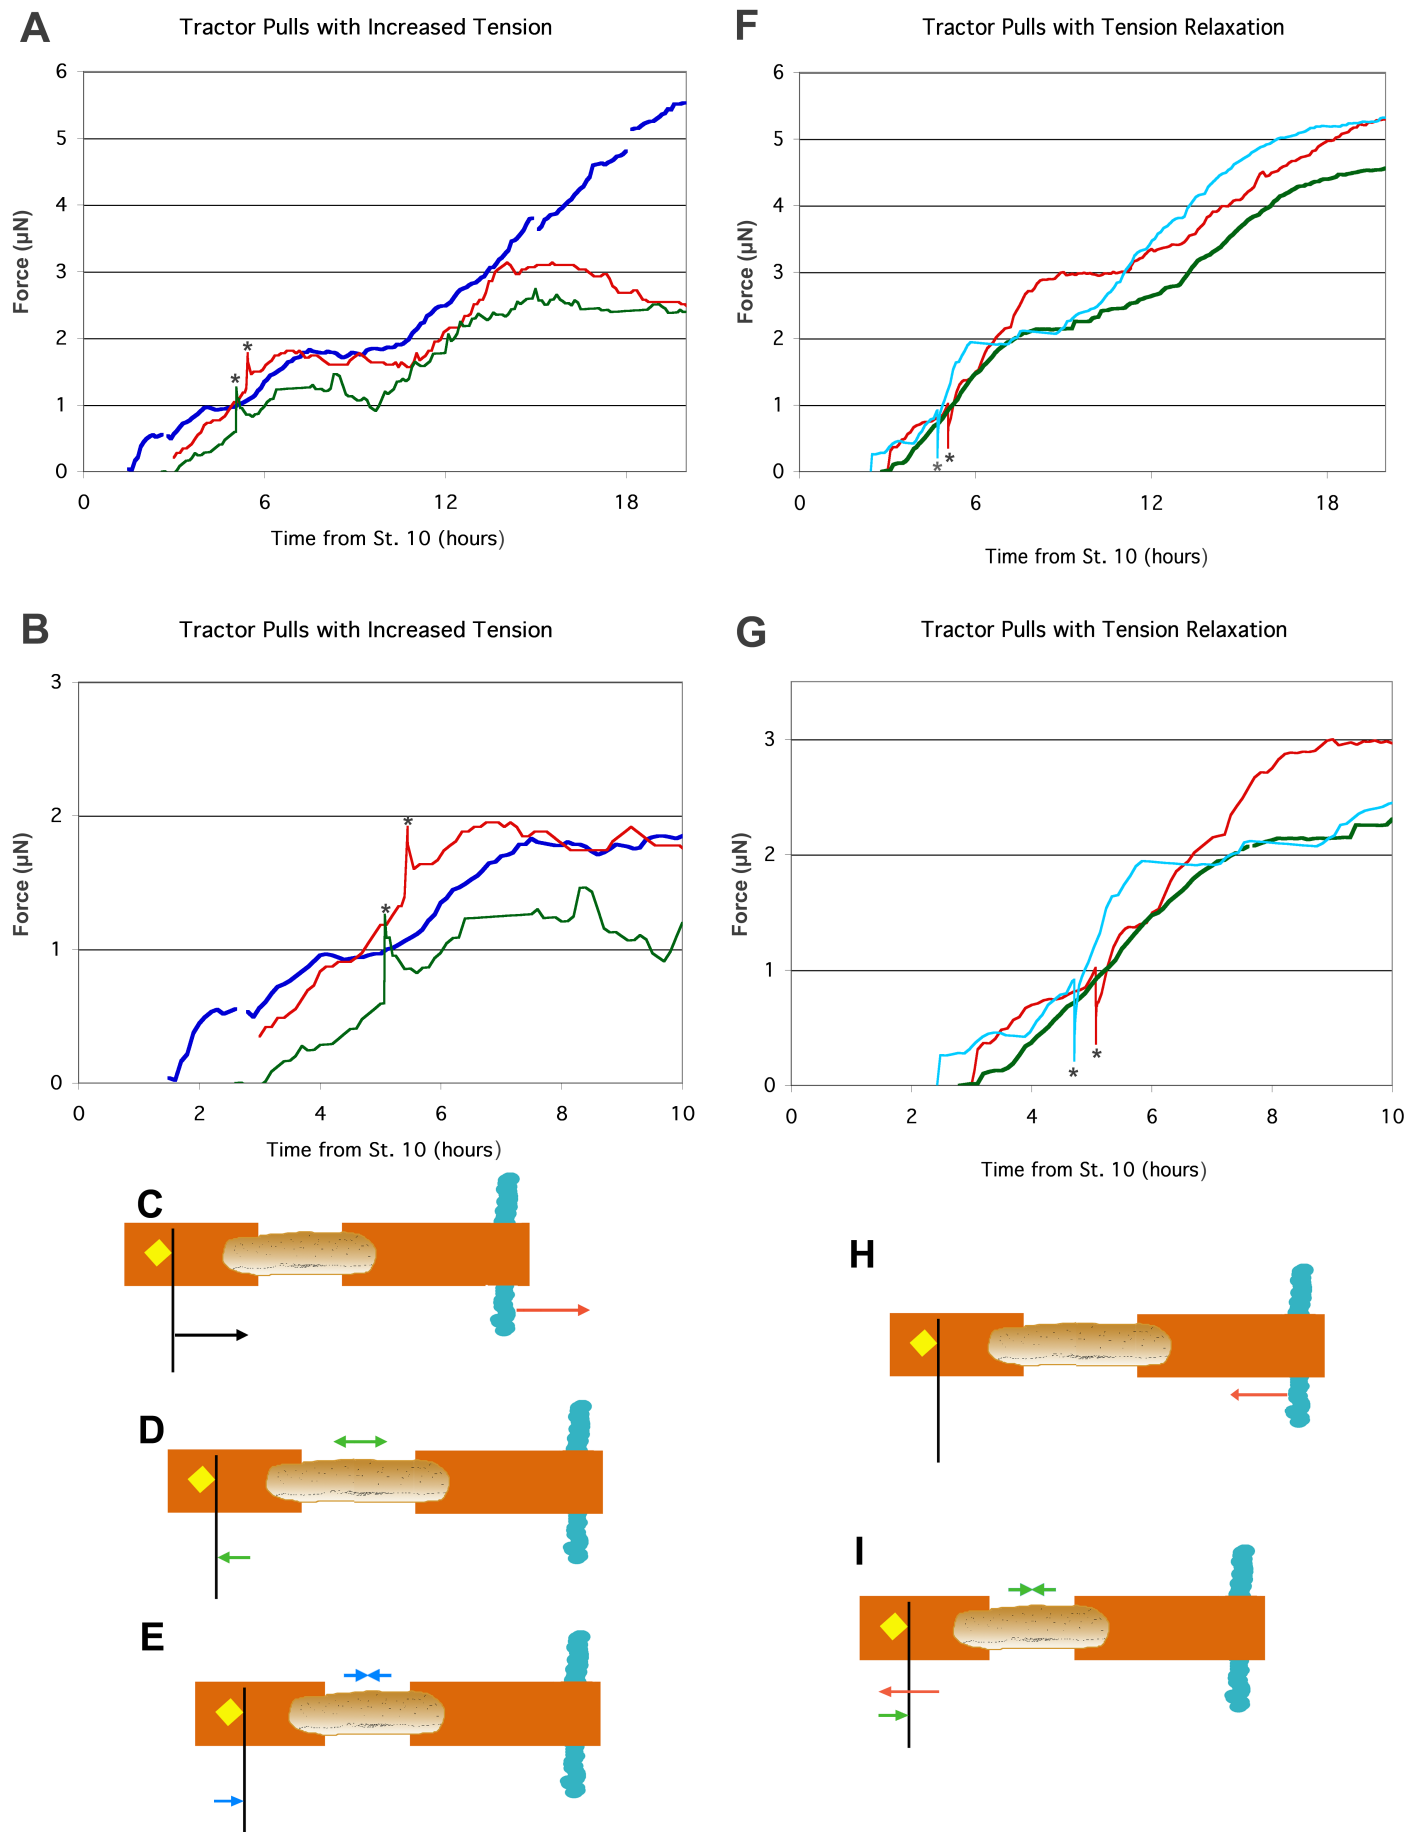

Figure 3-supplementary figure 4

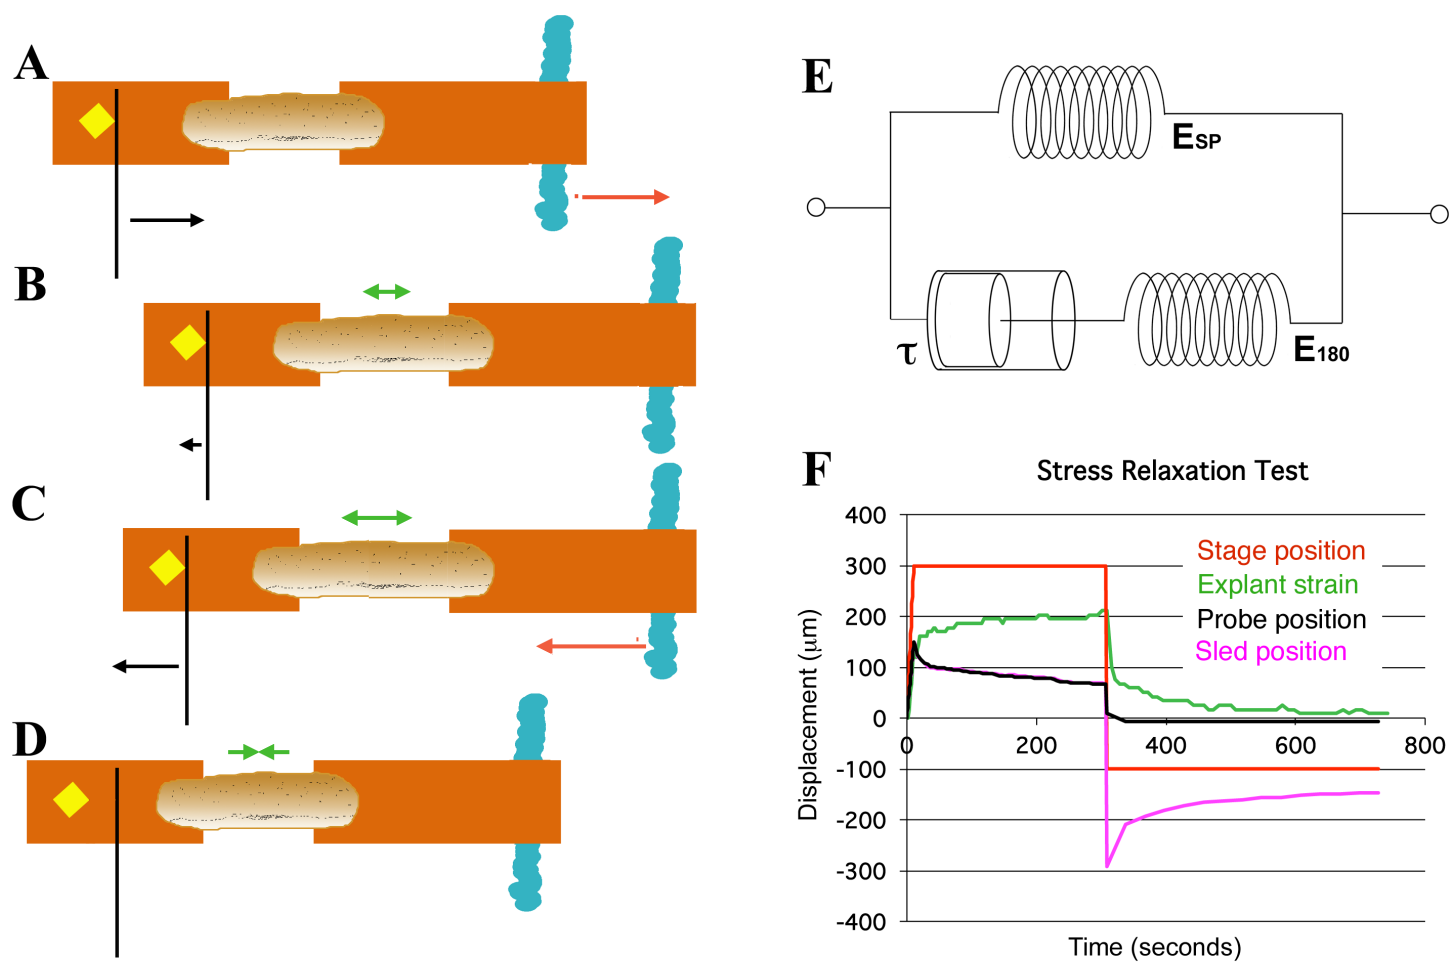

Figure 4

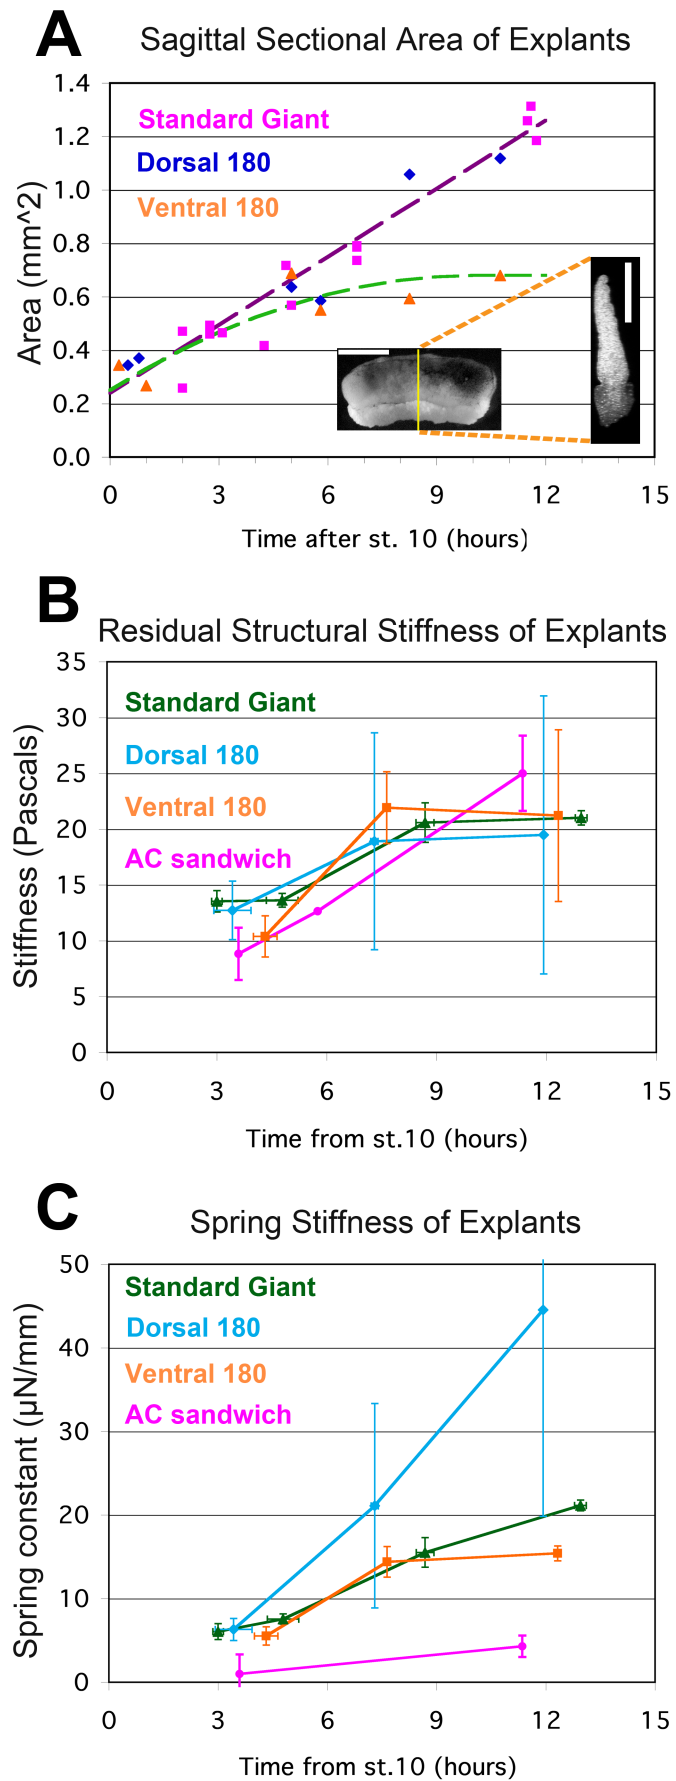

Figure 5

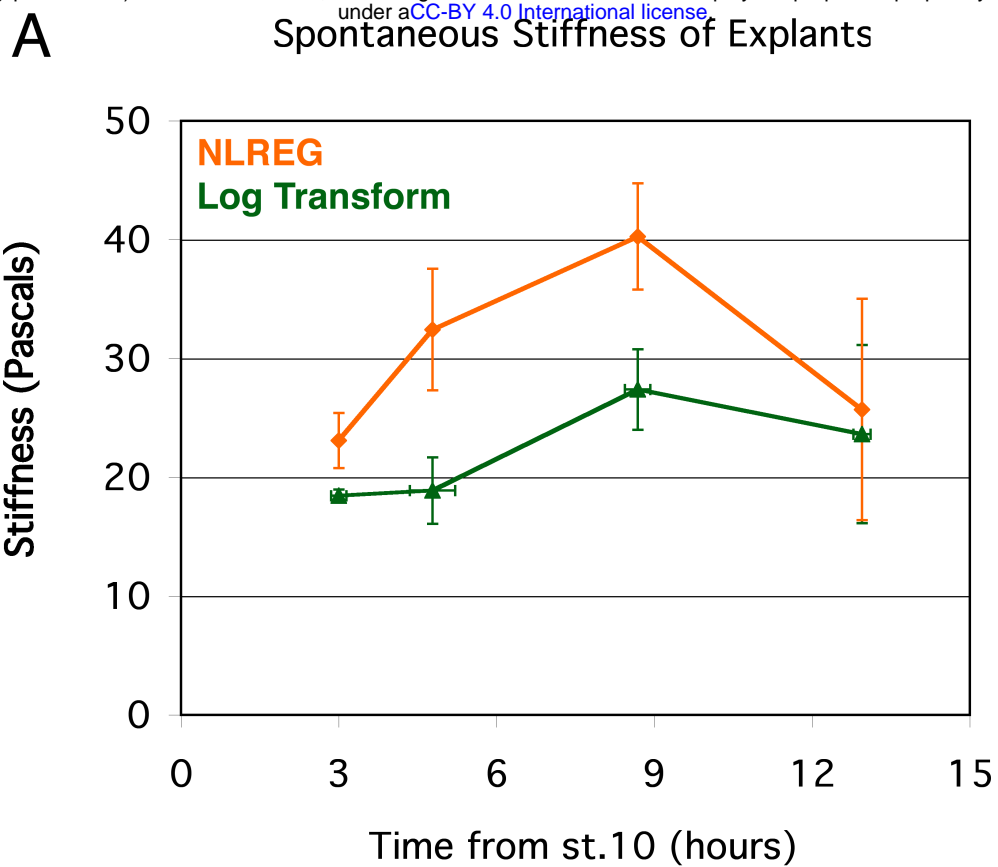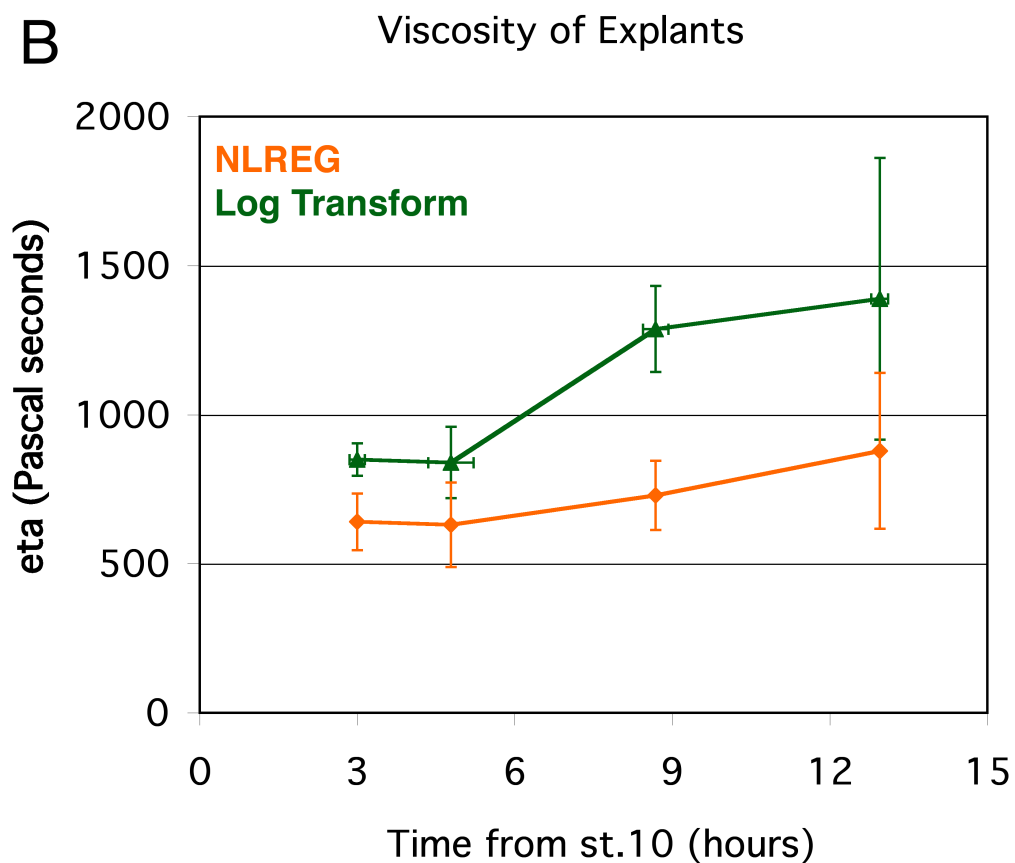

Figure 5-supplementary figure 1

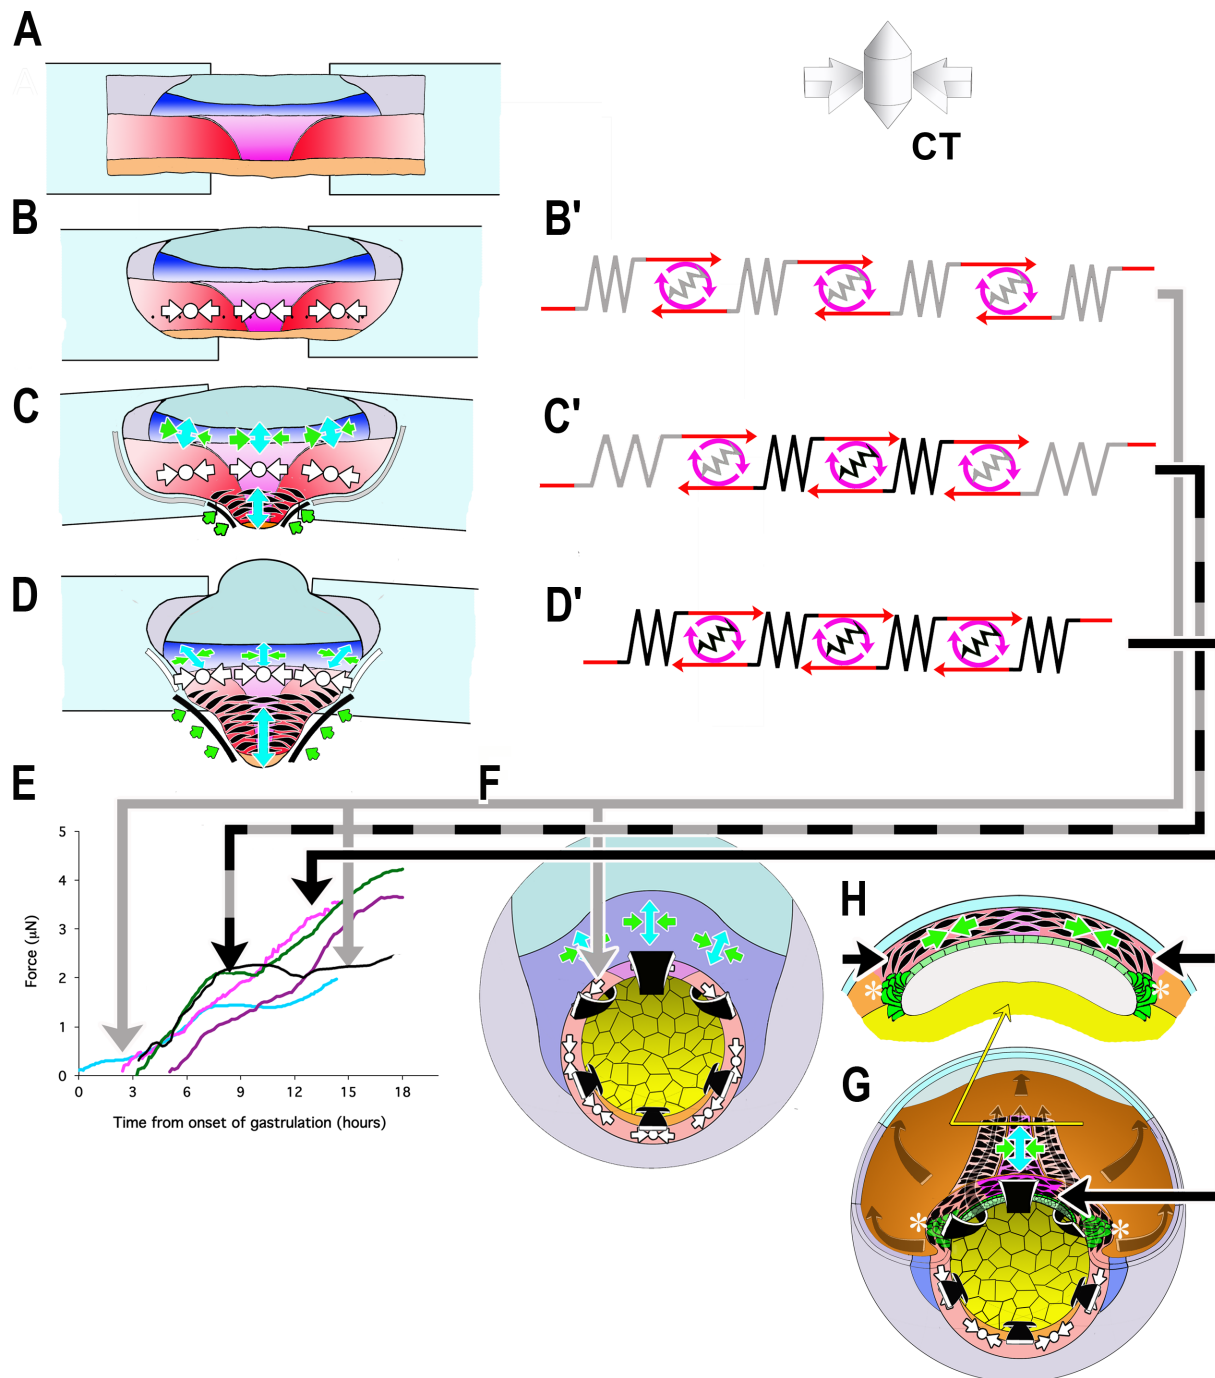

Fig. 6. Shook et al., 2017

## Log Transform of Stiffness Relaxation

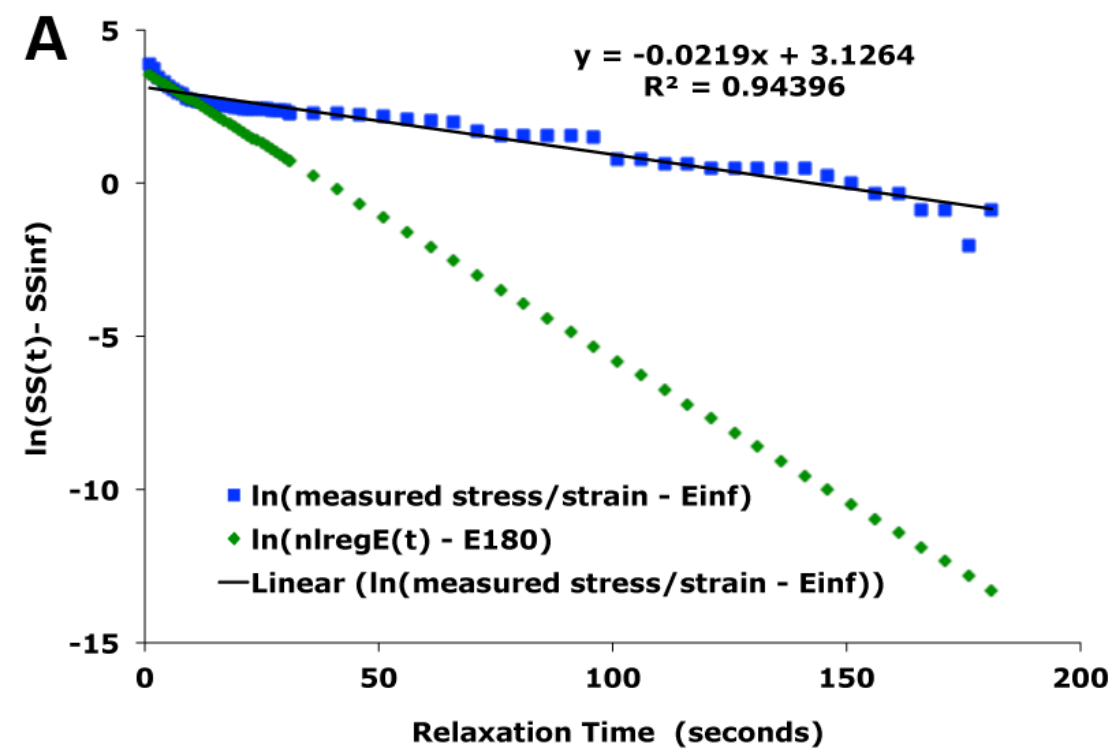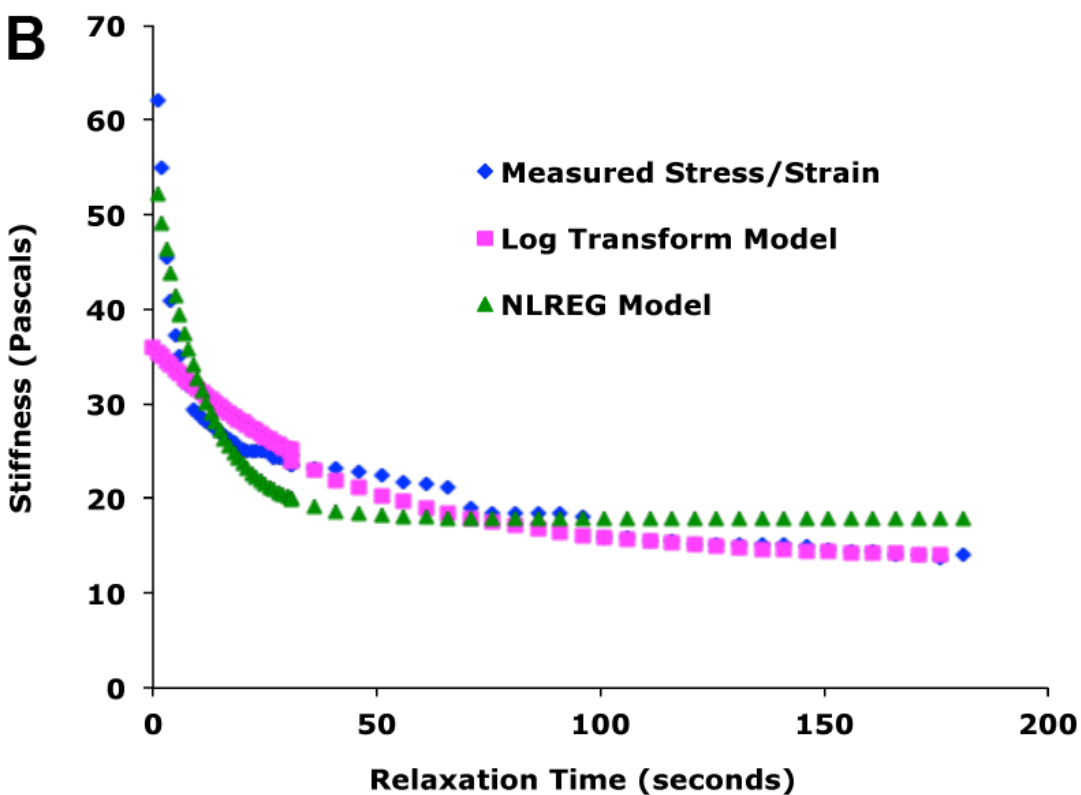

Source: https://www.biorxiv.org/content/10.1101/126201v2.full.pdf
